# Supplementary material for: Drought adaptation in Arabidopsis thaliana by extensive genetic loss-of-function
Source: eLife journal article supplement (doi:10.7554/elife.41038), 2018-12-06
Supplement: supp [file elife-41038-supp-v1.zip]

-2

-1

0

1

2

*Summer drought  
environments*

**Drought timing index**

$$\ln \left( \frac{\text{Spring drought frequency}}{\text{Summer drought frequency}} \right)$$

*Spring drought  
environments*

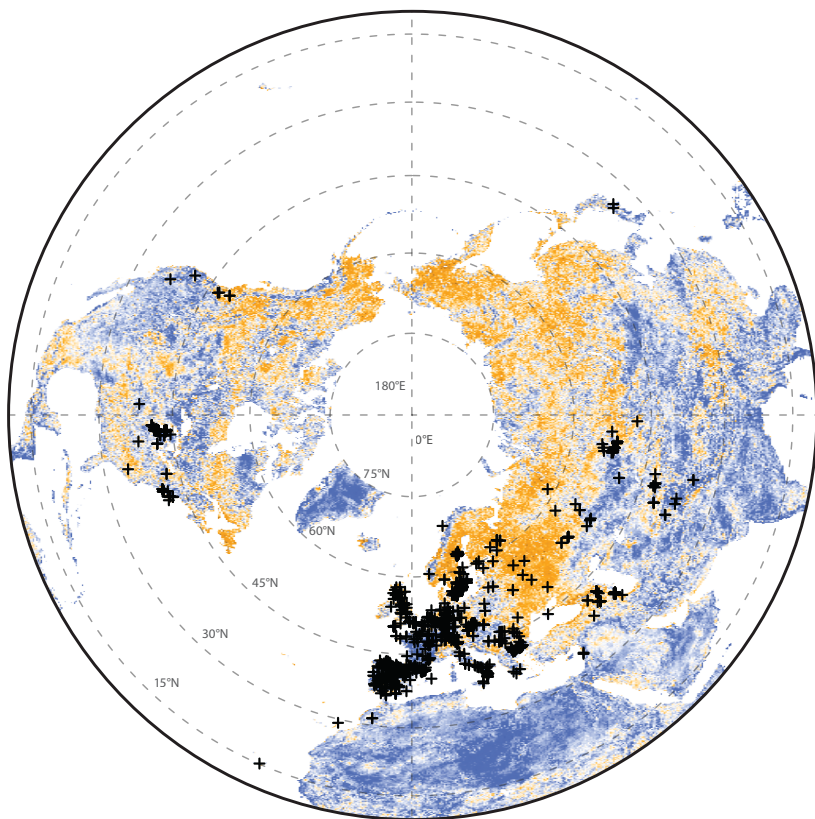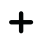

*Arabidopsis  
ecotypes*
