# Supplementary material for: Drought adaptation in Arabidopsis thaliana by extensive genetic loss-of-function
Source: eLife. 2018 Dec 6;7:e41038. doi: 10.7554/eLife.41038 (PMC6326724; doi:10.7554/eLife.41038)
Supplement: Supplementary file 1. — Includes ecotype identifiers as well as latitude and longitude of origin, seasonal drought frequencies (winter, spring, summer, fall), drought timing index (drought_timing), flowering time (FT10), and minimum temperature (BIO6). [file elife-41038-supp1.xlsx]

## Sheet: Ecotypes
	tg_ecotypeid	name	CS_number	country	latitude	longitude	collector	seq_by	Winter_DF	Spring_DF	Summer_DF	Fall_DF	Drought_timing	BIO_6	FT10	LoF_sum_fig3_candidates
1	88	CYR	CS76790	FRA	47.4	0.683333	Valerie Le Corre	Monsanto	0.321571	0.229741	0.338681	0.381285	-0.388107	9	61.25	27
2	108	LDV-18	CS77013	FRA	48.5167	-4.06667	Valerie Le Corre	Monsanto	0.261436	0.0621144	0.0409982	0.18391	0.415449	32	70	26
3	139	LDV-46	CS77014	FRA	48.5167	-4.06667	Valerie Le Corre	Monsanto	0.261436	0.0621144	0.0409982	0.18391	0.415449	32	68.75	17
4	159	MAR2-3	CS77070	FRA	47.35	3.93333	Valerie Le Corre	Monsanto	0.195697	0.0532703	0.155423	0.103978	-1.07077	-11	72	24
5	265	PYL-6	CS77198	FRA	44.65	-1.16667	Valerie Le Corre	Monsanto	NA	NA	NA	NA	NA	27	63.5	79
6	350	TOU-A1-88	CS77382	FRA	46.6667	4.11667	Fabrice Roux	Monsanto	0.134071	0.0462087	0.263403	0.26595	-1.74052	-7	68.5	20
7	351	TOU-A1-89	CS77383	FRA	46.6667	4.11667	Fabrice Roux	Monsanto	0.134071	0.0462087	0.263403	0.26595	-1.74052	-7	69.25	29
8	403	Zdarec3	CS78873	CZE	49.3667	16.2667	Marie-Theres Hauser	Monsanto	0.545767	0.152886	0.240162	0.291123	-0.451618	-57	63.5	24
9	410	Doubravnik7	CS76808	CZE	49.4211	16.3497	Marie-Theres Hauser	Monsanto	0.423193	0.245167	0.195393	0.392259	0.226926	-56	76	31
10	424	Draha2	CS76812	CZE	49.4112	16.2815	Marie-Theres Hauser	Monsanto	0.423193	0.245167	0.195393	0.392259	0.226926	-58	83.25	23
11	428	Borky1	CS76718	CZE	49.403	16.232	Marie-Theres Hauser	Monsanto	0.474038	0.271905	0.322227	0.379483	-0.169804	-59	75.75	23
12	430	Gr-1	CS76496	AUT	47	15.5	Albert Kranz	Salk	0.452969	0.288701	0.261826	0.385644	0.0977115	-67	92.33	61
13	470	BRR4	CS78943	USA	40.8313	-87.735	Diane Byers	MPI	0.498612	0.552516	0.378719	0.189891	0.377687	-105	NA	43
14	476	BRR12	CS78944	USA	40.8313	-87.735	Diane Byers	MPI	0.498612	0.552516	0.378719	0.189891	0.377687	-105	NA	44
15	484	BRR23	CS78945	USA	40.8313	-87.735	Diane Byers	MPI	0.498612	0.552516	0.378719	0.189891	0.377687	-105	NA	37
16	504	BRR57	CS78946	USA	40.8313	-87.735	Diane Byers	MPI	0.498612	0.552516	0.378719	0.189891	0.377687	-105	NA	40
17	506	BRR60	CS78947	USA	40.8313	-87.735	Diane Byers	MPI	0.498612	0.552516	0.378719	0.189891	0.377687	-105	NA	64
18	531	BRR107	CS78948	USA	40.8313	-87.735	Diane Byers	MPI	0.498612	0.552516	0.378719	0.189891	0.377687	-105	NA	31
19	544	LI-WP-039	CS78949	USA	40.9076	-73.2089	Oliver Bossdorf	MPI	NA	NA	NA	NA	NA	-52	NA	74
20	546	LI-WP-041	CS78950	USA	40.9076	-73.2089	Oliver Bossdorf	MPI	NA	NA	NA	NA	NA	-52	NA	73
21	628	LI-OF-061	CS78951	USA	40.7777	-72.9069	Oliver Bossdorf	MPI	0.381659	0.195461	0.0689702	0.102229	1.04169	-48	NA	81
22	630	LI-OF-065	CS77036	USA	40.7777	-72.9069	Oliver Bossdorf	Monsanto	0.381659	0.195461	0.0689702	0.102229	1.04169	-48	73.5	41
23	680	LI-RR-096	CS78952	USA	40.9447	-72.8615	Oliver Bossdorf	MPI	0.0853987	0.251817	0.442068	0.312006	-0.562761	-53	NA	71
24	681	LI-RR-097	CS78953	USA	40.9447	-72.8615	Oliver Bossdorf	MPI	0.0853987	0.251817	0.442068	0.312006	-0.562761	-53	NA	65
25	685	LI-EF-011	CS78954	USA	40.9064	-73.1493	Oliver Bossdorf	MPI	0.312363	0.097148	0.0673248	0.0363362	0.366706	-52	NA	71
26	687	LI-EF-018	CS78955	USA	40.9064	-73.1493	Oliver Bossdorf	MPI	0.312363	0.097148	0.0673248	0.0363362	0.366706	-52	NA	63
27	728	LI-SET-019	CS78956	USA	40.9352	-73.114	Oliver Bossdorf	MPI	0.312363	0.097148	0.0673248	0.0363362	0.366706	-52	NA	58
28	742	LI-SET-036	CS78957	USA	40.9352	-73.114	Oliver Bossdorf	MPI	0.312363	0.097148	0.0673248	0.0363362	0.366706	-52	NA	44
29	763	Kar-1	CS76522	KGZ	42.3	74.3667	Olivier Loudet	Salk	0.198058	0.296654	0.369738	0.329398	-0.220227	-206	65.75	58
30	765	Sus-1	CS76607	KGZ	42.1833	73.4	Olivier Loudet	Salk	0.238902	0.362677	0.292884	0.381822	0.213736	-189	56.75	57
31	766	Dja-1	CS76473	KGZ	42.5833	73.6333	Olivier Loudet	Salk	0.366794	0.356643	0.553682	0.317052	-0.439854	-255	63.5	60
32	768	Zal-1	CS76634	KGZ	42.8	76.35	Olivier Loudet	Salk	0.507871	0.58371	0.232826	0.314515	0.919114	-226	76.5	53
33	772	Neo-6	CS76560	TJK	37.35	72.4667	Olivier Loudet	Salk	0.330981	0.198958	0.275401	0.395457	-0.325135	-185	67.5	60
34	801	KYC-33	CS76992	USA	37.9169	-84.4639	Kathleen Donohue	Monsanto	0.192736	0.229261	0.185795	0.169194	0.210219	-51	94.75	65
35	853	MIA-1	CS78958	USA	41.7976	-86.6691	Kathleen Donohue	MPI	0.513412	0.27307	0.307898	0.235414	-0.12004	-88	NA	72
36	854	MIA-5	CS78959	USA	41.7976	-86.6691	Kathleen Donohue	MPI	0.513412	0.27307	0.307898	0.235414	-0.12004	-88	NA	73
37	867	MIC-20	CS78960	USA	41.8266	-86.4366	Kathleen Donohue	MPI	0.487861	0.245304	0.217674	0.201675	0.119496	-88	NA	68
38	868	MIC-24	CS78961	USA	41.8266	-86.4366	Kathleen Donohue	MPI	0.487861	0.245304	0.217674	0.201675	0.119496	-88	NA	72
39	870	MIC-31	CS77082	USA	41.8266	-86.4366	Kathleen Donohue	Monsanto	0.487861	0.245304	0.217674	0.201675	0.119496	-88	72.5	67
40	915	LIN S-5	CS77040	USA	41.8972	-71.4378	Kathleen Donohue	Monsanto	0.540818	0.463115	0.55279	0.568727	-0.177003	-83	63.75	37
41	932	CHA-41	CS76765	USA	42.3634	-71.1445	Kathleen Donohue	Monsanto	0.645979	0.503359	0.376114	0.356769	0.291412	-81	78	41
42	991	Ale-Stenar-41-1	CS76651	SWE	55.3833	14.05	Jon √Ögren	GMI	NA	NA	NA	NA	NA	-21	110.5	98
43	992	Ale-Stenar-44-4	CS76652	SWE	55.3833	14.05	Jon √Ögren	GMI	NA	NA	NA	NA	NA	-21	116	95
44	997	Ale-Stenar-56-14	CS76653	SWE	55.3833	14.05	Jon √Ögren	GMI	NA	NA	NA	NA	NA	-21	101.25	88
45	1002	Ale-Stenar-64-24	CS76654	SWE	55.3833	14.05	Jon √Ögren	GMI	NA	NA	NA	NA	NA	-21	102.75	88
46	1006	Ale-Stenar-77-31	CS77636	SWE	55.3833	14.05	Jon √Ögren	GMI	NA	NA	NA	NA	NA	-21	NA	117
47	1061	Br√∂sarp-11-135	CS76727	SWE	55.7167	14.1333	Jon √Ögren	GMI	0.553317	0.403469	0.152886	0.260522	0.970405	-25	97.75	67
48	1062	Br√∂sarp-15-138	CS76728	SWE	55.7167	14.1333	Jon √Ögren	GMI	0.553317	0.403469	0.152886	0.260522	0.970405	-25	94	116
49	1063	Br√∂sarp-21-140	CS76729	SWE	55.7167	14.1333	Jon √Ögren	GMI	0.553317	0.403469	0.152886	0.260522	0.970405	-25	84	100
50	1066	Br√∂sarp-34-145	CS76730	SWE	55.7167	14.1333	Jon √Ögren	GMI	0.553317	0.403469	0.152886	0.260522	0.970405	-25	128	103
51	1070	Br√∂sarp-45-153	CS77643	SWE	55.7167	14.1333	Jon √Ögren	GMI	0.553317	0.403469	0.152886	0.260522	0.970405	-25	NA	95
52	1158	Aledal-6-49	CS76656	SWE	56.7	16.5167	Jon √Ögren	GMI	0.537339	0.595665	0.0647196	0.215375	2.21962	-34	98.75	102
53	1166	Aledal-14-73	CS77651	SWE	56.7	16.5167	Jon √Ögren	GMI	0.537339	0.595665	0.0647196	0.215375	2.21962	-34	NA	92
54	1254	Tos-82-387	CS77379	SWE	59.4333	17.0167	Jon √Ögren	GMI	0.570319	0.434382	0.244916	0.172287	0.573008	-67	92	113
55	1257	Tos-95-393	CS77380	SWE	59.4333	17.0167	Jon √Ögren	GMI	0.570319	0.434382	0.244916	0.172287	0.573008	-67	94.67	83
56	1313	√Ñngs√∂-59-422	CS77658	SWE	59.5667	16.8667	Jon √Ögren	GMI	NA	NA	NA	NA	NA	-71	NA	115
57	1317	√Ñngs√∂-74-430	CS76665	SWE	59.5667	16.8667	Jon √Ögren	GMI	NA	NA	NA	NA	NA	-71	104.25	141
58	1552	Sku-30	CS77251	SWE	63.0833	18.3667	Jon √Ögren	GMI	0.4456	0.402025	0.0875497	0.276678	1.52431	-131	104	143
59	1612	Brn-10	CS78962	USA	41.9	-86.583	Diane Byers	MPI	0.513412	0.27307	0.307898	0.235414	-0.12004	-86	NA	73
60	1622	Brn-24	CS78963	USA	41.9	-86.583	Diane Byers	MPI	0.513412	0.27307	0.307898	0.235414	-0.12004	-86	NA	70
61	1651	DuckLkSP38	CS78964	USA	43.3431	-86.4045	Diane Byers	MPI	NA	NA	NA	NA	NA	-87	NA	72
62	1652	DuckLkSP40	CS78965	USA	43.3431	-86.4045	Diane Byers	MPI	NA	NA	NA	NA	NA	-87	NA	71
63	1676	Haz-2	CS78966	USA	41.879	-86.607	Diane Byers	MPI	0.513412	0.27307	0.307898	0.235414	-0.12004	-86	NA	73
64	1684	Haz-10	CS78967	USA	41.879	-86.607	Diane Byers	MPI	0.513412	0.27307	0.307898	0.235414	-0.12004	-86	NA	69
65	1739	KBS-Mac-68	CS78968	USA	42.405	-85.398	Diane Byers	MPI	0.411101	0.191828	0.318662	0.293716	-0.507532	-99	NA	39
66	1741	KBS-Mac-74	CS78969	USA	42.405	-85.398	Diane Byers	MPI	0.411101	0.191828	0.318662	0.293716	-0.507532	-99	NA	40
67	1756	Ker-4	CS78970	USA	42.184	-86.358	Diane Byers	MPI	0.30327	0.199026	0.231523	0.361609	-0.151243	-83	NA	67
68	1757	Ker-5	CS78971	USA	42.184	-86.358	Diane Byers	MPI	0.30327	0.199026	0.231523	0.361609	-0.151243	-83	NA	73
69	1793	L-R-5	CS78972	USA	41.847	-86.67	Diane Byers	MPI	0.513412	0.27307	0.307898	0.235414	-0.12004	-87	NA	66
70	1797	L-R-10	CS78973	USA	41.847	-86.67	Diane Byers	MPI	0.513412	0.27307	0.307898	0.235414	-0.12004	-87	NA	60
71	1819	Lak-12	CS78974	USA	41.8	-86.67	Diane Byers	MPI	0.513412	0.27307	0.307898	0.235414	-0.12004	-88	NA	74
72	1820	Lak-13	CS78975	USA	41.8	-86.67	Diane Byers	MPI	0.513412	0.27307	0.307898	0.235414	-0.12004	-88	NA	68
73	1829	Mdn-1	CS77077	USA	42.051	-86.509	Diane Byers	Monsanto	0.367099	0.272179	0.114699	0.298496	0.864148	-83	94.75	60
74	1834	Mdn-8	CS78976	USA	42.051	-86.509	Diane Byers	MPI	0.367099	0.272179	0.114699	0.298496	0.864148	-83	NA	63
75	1835	Mdn-10	CS78977	USA	42.051	-86.509	Diane Byers	MPI	0.367099	0.272179	0.114699	0.298496	0.864148	-83	NA	74
76	1851	MNF-Pot-10	CS78978	USA	43.595	-86.2657	Diane Byers	MPI	0.317419	0.1546	0.325723	0.234755	-0.745205	-99	NA	67
77	1852	MNF-Pot-15	CS78979	USA	43.595	-86.2657	Diane Byers	MPI	0.317419	0.1546	0.325723	0.234755	-0.745205	-99	NA	49
78	1853	MNF-Pot-21	CS77099	USA	43.595	-86.2657	Diane Byers	Monsanto	0.317419	0.1546	0.325723	0.234755	-0.745205	-99	71.5	42
79	1872	MNF-Pot-75	CS77100	USA	43.595	-86.2657	Diane Byers	Monsanto	0.317419	0.1546	0.325723	0.234755	-0.745205	-99	80.25	48
80	1890	MNF-Riv-21	CS77101	USA	43.5139	-86.1859	Diane Byers	Monsanto	0.482273	0.208762	0.274647	0.232542	-0.274292	-97	101	48
81	1925	MNF-Che-2	CS77096	USA	43.5251	-86.1843	Diane Byers	Monsanto	0.482273	0.208762	0.274647	0.232542	-0.274292	-97	89.5	46
82	1942	MNF-Che-47	CS78980	USA	43.5251	-86.1843	Diane Byers	MPI	0.482273	0.208762	0.274647	0.232542	-0.274292	-97	NA	42
83	1943	MNF-Che-49	CS78981	USA	43.5251	-86.1843	Diane Byers	MPI	0.482273	0.208762	0.274647	0.232542	-0.274292	-97	NA	42
84	1954	MNF-Jac-12	CS77097	USA	43.5187	-86.1739	Diane Byers	Monsanto	0.482273	0.208762	0.274647	0.232542	-0.274292	-97	93	50
85	2016	MNF-Pin-39	CS77098	USA	43.5356	-86.1788	Diane Byers	Monsanto	0.482273	0.208762	0.274647	0.232542	-0.274292	-97	77.5	44
86	2017	MNF-Pin-40	CS78982	USA	43.5356	-86.1788	Diane Byers	MPI	0.482273	0.208762	0.274647	0.232542	-0.274292	-97	NA	66
87	2031	Map-8	CS78983	USA	42.166	-86.412	Diane Byers	MPI	0.367099	0.272179	0.114699	0.298496	0.864148	-83	NA	69
88	2053	Map-35	CS78984	USA	42.166	-86.412	Diane Byers	MPI	0.367099	0.272179	0.114699	0.298496	0.864148	-83	NA	68
89	2057	Map-42	CS77732	USA	42.166	-86.412	Diane Byers	MPI	0.367099	0.272179	0.114699	0.298496	0.864148	-83	NA	72
90	2081	MuskSP-68	CS78985	USA	43.2483	-86.3368	Diane Byers	MPI	0.343069	0.38297	0.269094	0.366526	0.352897	-82	NA	39
91	2091	MuskSP-83	CS78986	USA	43.2483	-86.3368	Diane Byers	MPI	0.343069	0.38297	0.269094	0.366526	0.352897	-82	NA	37
92	2106	MSGA-10	CS78987	USA	43.2749	-86.0891	Diane Byers	MPI	0.285629	0.17791	0.286439	0.147155	-0.476246	-88	NA	48
93	2108	MSGA-12	CS78988	USA	43.2749	-86.0891	Diane Byers	MPI	0.285629	0.17791	0.286439	0.147155	-0.476246	-88	NA	66
94	2141	MSGA-61	CS78989	USA	43.2749	-86.0891	Diane Byers	MPI	0.285629	0.17791	0.286439	0.147155	-0.476246	-88	NA	44
95	2159	Paw-13	CS78990	USA	42.148	-86.431	Diane Byers	MPI	0.367099	0.272179	0.114699	0.298496	0.864148	-83	NA	40
96	2166	Paw-20	CS78991	USA	42.148	-86.431	Diane Byers	MPI	0.367099	0.272179	0.114699	0.298496	0.864148	-83	NA	45
97	2171	Paw-26	CS77164	USA	42.148	-86.431	Diane Byers	Monsanto	0.367099	0.272179	0.114699	0.298496	0.864148	-83	79	49
98	2191	Pent-7	CS78992	USA	43.7623	-86.3929	Diane Byers	MPI	0.214662	0.13369	0.240505	0.374049	-0.587217	-94	NA	75
99	2202	Pent-23	CS77168	USA	43.7623	-86.3929	Diane Byers	Monsanto	0.214662	0.13369	0.240505	0.374049	-0.587217	-94	97.75	47
100	2212	Pent-46	CS78993	USA	43.7623	-86.3929	Diane Byers	MPI	0.214662	0.13369	0.240505	0.374049	-0.587217	-94	NA	64
101	2239	Riv-25	CS78994	USA	42.184	-86.382	Diane Byers	MPI	0.30327	0.199026	0.231523	0.361609	-0.151243	-83	NA	68
102	2240	Riv-26	CS78995	USA	42.184	-86.382	Diane Byers	MPI	0.30327	0.199026	0.231523	0.361609	-0.151243	-83	NA	70
103	2276	SLSP-31	CS77254	USA	43.665	-86.496	Diane Byers	Monsanto	0.184899	0.272659	0.0391471	0.0972439	1.94089	-94	83	25
104	2278	SLSP-35	CS77255	USA	43.665	-86.496	Diane Byers	Monsanto	0.184899	0.272659	0.0391471	0.0972439	1.94089	-94	79.25	58
105	2285	SLSP-69	CS78996	USA	43.665	-86.496	Diane Byers	MPI	0.184899	0.272659	0.0391471	0.0972439	1.94089	-94	NA	73
106	2286	SLSP-67	CS78997	USA	43.665	-86.496	Diane Byers	MPI	0.184899	0.272659	0.0391471	0.0972439	1.94089	-94	NA	69
107	2317	Ste-40	CS77278	USA	42.03	-86.514	Diane Byers	Monsanto	0.375994	0.268477	0.234609	0.219504	0.134846	-84	77	26
108	2370	Yng-4	CS78998	USA	41.865	-86.646	Diane Byers	MPI	0.513412	0.27307	0.307898	0.235414	-0.12004	-87	NA	51
109	2412	Yng-53	CS78999	USA	41.865	-86.646	Diane Byers	MPI	0.513412	0.27307	0.307898	0.235414	-0.12004	-87	NA	51
110	4779	UKSW06-179	CS78808	UK	50.4	-4.9	Eric Holub	Monsanto	0.30723	0.130262	0.184355	0.219165	-0.347315	20	68.67	68
111	4807	UKSW06-207	CS78809	UK	50.4	-4.9	Eric Holub	Monsanto	0.30723	0.130262	0.184355	0.219165	-0.347315	20	79.75	58
112	4826	UKSW06-226	CS78810	UK	50.4	-4.9	Eric Holub	Monsanto	0.30723	0.130262	0.184355	0.219165	-0.347315	20	60	46
113	4840	UKSW06-240	CS79000	UK	50.4	-4.9	Eric Holub	MPI	0.30723	0.130262	0.184355	0.219165	-0.347315	20	NA	61
114	4857	UKSW06-257	CS79001	UK	50.3	-4.9	Eric Holub	MPI	0.30723	0.130262	0.184355	0.219165	-0.347315	25	NA	55
115	4884	UKSW06-285	CS78811	UK	50.3	-4.9	Eric Holub	Monsanto	0.30723	0.130262	0.184355	0.219165	-0.347315	25	70.25	40
116	4900	UKSW06-302	CS78812	UK	50.3	-4.8	Eric Holub	Monsanto	0.635421	0.368915	0.121418	0.31074	1.11133	25	71	30
117	4939	UKSW06-341	CS79002	UK	50.4	-4.7	Eric Holub	MPI	0.68004	0.59941	0.605855	0.476541	-0.0106941	24	NA	59
118	4958	UKSW06-360	CS78814	UK	50.5	-4.5	Eric Holub	Monsanto	0.299097	0.181955	0.0924174	0.224219	0.677446	21	91.25	71
119	5023	UKSE06-118	CS78799	UK	51.3	0.5	Eric Holub	Monsanto	0.648284	0.244824	0.278281	0.336718	-0.128091	6	61	34
120	5104	UKSE06-252	CS78800	UK	51.3	0.5	Eric Holub	Monsanto	0.648284	0.244824	0.278281	0.336718	-0.128091	6	60	22
121	5151	UKSE06-325	CS78801	UK	52.2	-1.7	Eric Holub	Monsanto	0.424521	0.108597	0.105718	0.180829	0.026873	4	81.75	59
122	5165	UKSE06-362	CS78802	UK	51.3	0.4	Eric Holub	Monsanto	0.462177	0.115385	0.242287	0.275883	-0.741852	9	86.5	48
123	5210	UKSE06-432	CS78803	UK	51.2	0.3	Eric Holub	Monsanto	0.327921	0.131085	0.203826	0.225561	-0.441422	10	96	48
124	5236	UKSE06-470	CS78804	UK	51.2	0.4	Eric Holub	Monsanto	0.327921	0.131085	0.203826	0.225561	-0.441422	11	58.5	38
125	5249	UKSE06-491	CS79003	UK	51.2	0.3	Eric Holub	MPI	0.327921	0.131085	0.203826	0.225561	-0.441422	10	NA	66
126	5253	UKSE06-500	CS78805	UK	51.1	0.6	Eric Holub	Monsanto	0.286593	0.114082	0.237557	0.309686	-0.733488	10	62.75	15
127	5276	UKSE06-533	CS78806	UK	51.3	1.1	Eric Holub	Monsanto	0.50719	0.127108	0.244755	0.215273	-0.65522	13	74.5	15
128	5279	UKSE06-541	CS79004	UK	51.3	1.1	Eric Holub	MPI	0.50719	0.127108	0.244755	0.215273	-0.65522	13	NA	65
129	5349	UKSE06-639	CS78807	UK	51.1	0.4	Eric Holub	Monsanto	0.216676	0.143905	0.143905	0.254969	0	8	92	46
130	5353	UKNW06-003	CS78792	UK	54.5	-3	Eric Holub	Monsanto	0.502417	0.151721	0.149664	0.311477	0.013649	-27	71	27
131	5395	UKNW06-102	CS79005	UK	54.4	-3	Eric Holub	MPI	0.484801	0.175785	0.103867	0.113146	0.526153	-5	NA	53
132	5486	UKNW06-233	CS78794	UK	54.6	-3.3	Eric Holub	Monsanto	0.627198	0.101124	0.110928	0.244375	-0.0925328	-5	60.5	22
133	5577	UKNW06-403	CS78797	UK	54.7	-3.4	Eric Holub	Monsanto	0.422404	0.0275607	0.0436035	0.0746038	-0.458746	-2	66.75	23
134	5644	UKNW06-481	CS78798	UK	54.4	-2.9	Eric Holub	Monsanto	0.484801	0.175785	0.103867	0.113146	0.526153	-10	60.75	33
135	5651	UKNW06-488	CS79006	UK	54.4	-2.9	Eric Holub	MPI	0.484801	0.175785	0.103867	0.113146	0.526153	-10	NA	53
136	5717	Bra-1	CS79007	UK	54.6	-3.2	Eric Holub	MPI	0.627198	0.101124	0.110928	0.244375	-0.0925328	-5	NA	65
137	5718	UKID11	CS79008	UK	57	-3.4	Eric Holub	MPI	0.370779	0.220965	0.112848	0.198006	0.671965	-36	NA	55
138	5720	Cal-2	CS78781	UK	53.3	-1.6	D. Ratcliffe	Monsanto	0.332138	0.147607	0.156314	0.139043	-0.0573132	-3	92	48
139	5726	Cnt-1	CS78782	UK	51.3	1.1	Eric Holub	Monsanto	0.50719	0.127108	0.244755	0.215273	-0.65522	13	74	20
140	5741	For-2	CS78783	UK	56.6	-4.1	D. Ratcliffe	Monsanto	0.588955	0.293569	0.12512	0.120002	0.85284	-33	97.25	53
141	5748	Kil-0	CS78784	UK	56	-4.4	D. Ratcliffe	Monsanto	0.451306	0.170575	0.151721	0.407778	0.11713	-11	60.75	36
142	5757	Mc-1	CS78785	UK	54.6	-2.3	D. Ratcliffe	Monsanto	0.479664	0.223228	0.0883039	0.212576	0.927409	-30	87.75	45
143	5768	UKID63	CS78786	UK	54.1	-1.5	Eric Holub	Monsanto,MPI	0.549054	0.351022	0.231592	0.254022	0.415871	7	96.25	31
144	5772	Set-1	CS78787	UK	54.1	-2.3	D. Ratcliffe	Monsanto	0.547756	0.113739	0.0804196	0.176486	0.34665	-6	66.75	29
145	5776	UKID71	CS79009	UK	52.9	-1.3	Eric Holub	MPI	0.360127	0.15508	0.331894	0.180373	-0.760872	4	NA	54
146	5779	UKID74	CS78789	UK	51	-3.1	Eric Holub	Monsanto	0.303167	0.236117	0.175031	0.303971	0.299364	10	90.5	30
147	5784	Ty-1	CS78790	UK	56.4	-5.2	D. Ratcliffe	Monsanto	0.500707	0.237351	0.168449	0.3058	0.342905	-4	101.75	61
148	5798	UKID93	CS79010	UK	53.1	-3.3	Eric Holub	MPI	0.328778	0.238242	0.0580694	0.160722	1.41165	3	NA	57
149	5800	UKID96	CS78791	UK	57.4	-5.5	Eric Holub	Monsanto	0.708295	0.300357	0.19793	0.386545	0.417059	0	61.75	27
150	5811	UKID107	CS78778	UK	52.9	-3.1	Eric Holub	Monsanto	0.232269	0.124709	0.12608	0.223553	-0.010935	-9	72	39
151	5822	UKID116	CS78780	UK	56.7333	-5.98333	Eric Holub	Monsanto	0.527561	0.334289	0.173797	0.458722	0.654119	3	112.75	86
152	5830	App1-12	CS76667	SWE	56.3333	15.9667	Magnus Nordborg	GMI	0.445907	0.413753	0.133278	0.184241	1.13283	-31	97.75	68
153	5831	App1-14	CS76668	SWE	56.3333	15.9667	Magnus Nordborg	GMI	0.445907	0.413753	0.133278	0.184241	1.13283	-31	99.5	109
154	5832	App1-16	CS76669	SWE	56.3333	15.9667	Magnus Nordborg	GMI	0.445907	0.413753	0.133278	0.184241	1.13283	-31	88.5	118
155	5836	Boo2-3	CS77906	SWE	55.86	13.51	Magnus Nordborg	GMI	0.47789	0.448718	0.219251	0.155817	0.716176	-30	NA	135
156	5837	Bor-1	CS76453	CZE	49.4013	16.2326	Jirina Relichov	Salk	0.474038	0.271905	0.322227	0.379483	-0.169804	-59	80.5	40
157	5856	D√∂r-10	CS76806	SWE	63.0167	17.4914	Magnus Nordborg	GMI	0.429117	0.277899	0.117441	0.166118	0.861319	-141	119	138
158	5860	Dra-3	CS77913	SWE	62.6814	18.0165	Magnus Nordborg	GMI	0.44167	0.504735	0.304744	0.590735	0.50456	-123	NA	146
159	5865	Dra1-4	CS76809	SWE	55.76	14.12	Magnus Nordborg	GMI	0.583063	0.819827	0.591458	0.710687	0.326504	-28	109.75	101
160	5867	Dra2-1	CS76810	SWE	55.76	14.12	Magnus Nordborg	GMI	0.583063	0.819827	0.591458	0.710687	0.326504	-28	130.5	113
161	5874	DraII-6	CS76814	CZE	49.4112	16.2815	Jirina Relichov	Monsanto	0.423193	0.245167	0.195393	0.392259	0.226926	-58	78	27
162	5890	DraIV 1-8	CS76817	CZE	49.4112	16.2815	Jirina Relichov	Monsanto	0.423193	0.245167	0.195393	0.392259	0.226926	-58	78.25	19
163	5893	DraIV 1-11	CS76816	CZE	49.4112	16.2815	Jirina Relichov	Monsanto	0.423193	0.245167	0.195393	0.392259	0.226926	-58	73.75	21
164	5907	DraIV 2-9	CS76818	CZE	49.4112	16.2815	Jirina Relichov	Monsanto	0.423193	0.245167	0.195393	0.392259	0.226926	-58	66.5	27
165	5921	DraIV 3-7	CS76819	CZE	49.4112	16.2815	Jirina Relichov	Monsanto	0.423193	0.245167	0.195393	0.392259	0.226926	-58	82.5	22
166	5950	DraIV 5-12	CS76820	CZE	49.4112	16.2815	Jirina Relichov	Monsanto	0.423193	0.245167	0.195393	0.392259	0.226926	-58	81.25	31
167	5984	DraIV 6-13	CS76822	CZE	49.4112	16.2815	Jirina Relichov	Monsanto	0.423193	0.245167	0.195393	0.392259	0.226926	-58	66.75	31
168	5993	DraIV 6-22	CS76823	CZE	49.4112	16.2815	Jirina Relichov	Monsanto	0.423193	0.245167	0.195393	0.392259	0.226926	-58	82.5	25
169	6008	Duk	CS76824	CZE	49.1	16.2	Jirina Relichov	Salk	0.304766	0.344646	0.390717	0.36401	-0.125467	-51	73.5	33
170	6009	Eden-1	CS76826	SWE	62.877	18.177	Magnus Nordborg	GMI	0.327529	0.405959	0.176882	0.298952	0.830769	-129	103	159
171	6010	Eden-5	CS78000	SWE	62.877	18.177	Magnus Nordborg	GMI	0.327529	0.405959	0.176882	0.298952	0.830769	-129	NA	178
172	6011	Eden-6	CS76828	SWE	62.877	18.177	Magnus Nordborg	GMI	0.327529	0.405959	0.176882	0.298952	0.830769	-129	97.33	172
173	6012	Eden-7	CS76829	SWE	62.877	18.177	Magnus Nordborg	GMI	0.327529	0.405959	0.176882	0.298952	0.830769	-129	102	170
174	6013	Eden-9	CS76830	SWE	62.877	18.177	Magnus Nordborg	GMI	0.327529	0.405959	0.176882	0.298952	0.830769	-129	93.75	162
175	6016	Eds-1	CS76834	SWE	62.9	18.4	Magnus Nordborg	GMI	0.392236	0.56403	0.462361	0.733175	0.198761	-128	87.33	137
176	6017	Eds-9	CS76835	SWE	62.9	18.4	Magnus Nordborg	GMI	0.392236	0.56403	0.462361	0.733175	0.198761	-128	96.5	160
177	6019	Fj√§1-2	CS76860	SWE	56.06	14.29	Magnus Nordborg	GMI	0.498102	0.257439	0.137186	0.375483	0.629441	-28	103.5	88
178	6020	Fj√§1-5	CS76861	SWE	56.06	14.29	Magnus Nordborg	GMI	0.498102	0.257439	0.137186	0.375483	0.629441	-28	94	61
179	6021	Fj√§2-4	CS76862	SWE	56.06	14.29	Magnus Nordborg	GMI	0.498102	0.257439	0.137186	0.375483	0.629441	-28	94.25	89
180	6022	Fj√§2-6	CS78009	SWE	56.06	14.29	Magnus Nordborg	GMI	0.498102	0.257439	0.137186	0.375483	0.629441	-28	NA	101
181	6023	Fly2-1	CS76863	SWE	55.7509	13.3712	Magnus Nordborg	GMI	0.355932	0.369807	0.130399	0.246391	1.04238	-29	93.75	132
182	6024	Fly2-2	CS76864	SWE	55.7509	13.3712	Magnus Nordborg	GMI	0.355932	0.369807	0.130399	0.246391	1.04238	-29	106.75	138
183	6025	Gro-3	CS76889	SWE	62.6437	17.7339	Magnus Nordborg	GMI	0.437178	0.552083	0.0983135	0.253635	1.72554	-126	129.25	164
184	6030	Gr√∂n-5	CS76893	SWE	62.806	18.1896	Magnus Nordborg	GMI	0.327529	0.405959	0.176882	0.298952	0.830769	-124	107.25	98
185	6034	Hov1-7	CS76932	SWE	56.1	13.74	Magnus Nordborg	GMI	0.387735	0.194227	0.110037	0.267084	0.568212	-33	102.75	120
186	6035	Hov1-10	CS76931	SWE	56.1	13.74	Magnus Nordborg	GMI	0.387735	0.194227	0.110037	0.267084	0.568212	-33	83	72
187	6036	Hov3-2	CS76934	SWE	56.1	13.74	Magnus Nordborg	GMI	0.387735	0.194227	0.110037	0.267084	0.568212	-33	94.25	66
188	6038	Hov3-5	CS76935	SWE	56.1	13.74	Magnus Nordborg	GMI	0.387735	0.194227	0.110037	0.267084	0.568212	-33	91.25	101
189	6039	Hovdala-2	CS76937	SWE	56.1	13.74	Torbjorn Sall	GMI	0.387735	0.194227	0.110037	0.267084	0.568212	-33	91	76
190	6040	Kni-1	CS76970	SWE	55.66	13.4	Magnus Nordborg	GMI	0.397157	0.159811	0.156109	0.18869	0.0234386	-29	93.25	118
191	6041	Lis-3	CS77044	SWE	56.0328	14.775	Magnus Nordborg	GMI	0.41848	0.6223	0.38435	0.508052	0.481869	-25	78.75	75
192	6042	Lom1-1	CS77048	SWE	56.09	13.9	Magnus Nordborg	GMI	0.494404	0.250446	0.175579	0.252851	0.355151	-31	63.5	61
193	6043	L√∂v-1	CS77049	SWE	62.801	18.079	Magnus Nordborg	GMI	0.404441	0.450466	0.0572467	0.426197	2.06291	-122	110	112
194	6046	L√∂v-5	CS77050	SWE	62.801	18.079	Magnus Nordborg	GMI	0.404441	0.450466	0.0572467	0.426197	2.06291	-122	117.25	143
195	6064	Nyl-2	CS77136	SWE	62.9513	18.2763	Magnus Nordborg	GMI	0.464058	0.403992	0.0757576	0.444042	1.67386	-126	103.67	165
196	6069	Nyl-7	CS77137	SWE	62.9513	18.2763	Magnus Nordborg	GMI	0.464058	0.403992	0.0757576	0.444042	1.67386	-126	107.25	169
197	6070	Omn-1	CS77145	SWE	62.9308	18.3448	Magnus Nordborg	GMI	0.521159	0.34375	0.213012	0.326517	0.478564	-128	106.75	160
198	6071	Omn-5	CS77146	SWE	62.9308	18.3448	Magnus Nordborg	GMI	0.521159	0.34375	0.213012	0.326517	0.478564	-128	120.75	162
199	6073	√ñM√∂1-7	CS77147	SWE	56.1481	15.8155	Magnus Nordborg	GMI	NA	NA	NA	NA	NA	-29	102.25	78
200	6074	√ñr-1	CS77150	SWE	56.4573	16.1308	Magnus Nordborg	GMI	NA	NA	NA	NA	NA	-31	101	106
201	6076	Rev-2	CS77215	SWE	55.6942	13.4504	Magnus Nordborg	GMI	0.397157	0.159811	0.156109	0.18869	0.0234386	-27	121.5	106
202	6077	Rev-3	CS78030	SWE	55.6942	13.4504	Magnus Nordborg	GMI	0.397157	0.159811	0.156109	0.18869	0.0234386	-27	NA	120
203	6085	Sparta-1	CS77260	SWE	55.7097	13.2145	Magnus Nordborg	GMI	0.449562	0.330934	0.273207	0.219032	0.191688	-30	124.25	116
204	6086	Sr:3	CS77267	SWE	58.9	11.2	Ivo Cetl	GMI	0.459597	0.365093	0.131839	0.287499	1.01857	-41	100.5	119
205	6087	Stu-2	CS78033	SWE	56.4666	16.1284	Magnus Nordborg	GMI	NA	NA	NA	NA	NA	-31	NA	87
206	6088	Stu1-1	CS77285	SWE	56.4666	16.1284	Magnus Nordborg	GMI	NA	NA	NA	NA	NA	-31	107.67	86
207	6090	T1000	CS77288	SWE	55.6525	13.2197	Mattias Jakobsson	GMI	0.449562	0.330934	0.273207	0.219032	0.191688	-26	94.75	104
208	6091	T1010	CS78035	SWE	55.6525	13.215	Mattias Jakobsson	GMI	0.449562	0.330934	0.273207	0.219032	0.191688	-26	NA	124
209	6092	T1020	CS77289	SWE	55.6514	13.2233	Mattias Jakobsson	GMI	0.449562	0.330934	0.273207	0.219032	0.191688	-26	103	99
210	6094	T1040	CS77290	SWE	55.6494	13.2147	Mattias Jakobsson	GMI	0.449562	0.330934	0.273207	0.219032	0.191688	-26	101.75	75
211	6095	T1050	CS78039	SWE	55.6486	13.2161	Mattias Jakobsson	GMI	0.449562	0.330934	0.273207	0.219032	0.191688	-26	NA	116
212	6096	T1060	CS78040	SWE	55.6472	13.2225	Mattias Jakobsson	GMI	0.449562	0.330934	0.273207	0.219032	0.191688	-26	NA	101
213	6097	T1070	CS77291	SWE	55.6481	13.2264	Mattias Jakobsson	GMI	0.449562	0.330934	0.273207	0.219032	0.191688	-26	114.5	112
214	6098	T1080	CS77292	SWE	55.6561	13.2178	Mattias Jakobsson	GMI	0.449562	0.330934	0.273207	0.219032	0.191688	-26	112.25	105
215	6099	T1090	CS77293	SWE	55.6575	13.2386	Mattias Jakobsson	GMI	0.449562	0.330934	0.273207	0.219032	0.191688	-26	117	119
216	6100	T1110	CS77294	SWE	55.6	13.2	Mattias Jakobsson	GMI	0.449562	0.330934	0.273207	0.219032	0.191688	-26	102	92
217	6101	T1120	CS78045	SWE	55.6	13.2	Mattias Jakobsson	GMI	0.449562	0.330934	0.273207	0.219032	0.191688	-26	NA	116
218	6102	T1130	CS77295	SWE	55.6	13.2	Mattias Jakobsson	GMI	0.449562	0.330934	0.273207	0.219032	0.191688	-26	122.33	107
219	6104	T1160	CS77296	SWE	55.7	13.2	Mattias Jakobsson	GMI	0.449562	0.330934	0.273207	0.219032	0.191688	-27	100	152
220	6105	T450	CS77297	SWE	55.7967	13.1211	Mattias Jakobsson	GMI	0.412129	0.449061	0.16173	0.341433	1.02123	-29	97.75	76
221	6106	T460	CS77298	SWE	55.7931	13.1186	Mattias Jakobsson	GMI	0.412129	0.449061	0.16173	0.341433	1.02123	-29	102	117
222	6107	T470	CS77299	SWE	55.7942	13.1222	Mattias Jakobsson	GMI	0.412129	0.449061	0.16173	0.341433	1.02123	-29	119	119
223	6108	T480	CS77300	SWE	55.7989	13.1206	Mattias Jakobsson	GMI	0.412129	0.449061	0.16173	0.341433	1.02123	-29	78.75	81
224	6109	T510	CS77301	SWE	55.7936	13.1233	Mattias Jakobsson	GMI	0.412129	0.449061	0.16173	0.341433	1.02123	-29	100.75	97
225	6111	T530	CS77302	SWE	55.7989	13.1219	Mattias Jakobsson	GMI	0.412129	0.449061	0.16173	0.341433	1.02123	-29	111.75	105
226	6112	T540	CS77303	SWE	55.7967	13.1044	Mattias Jakobsson	GMI	0.412129	0.449061	0.16173	0.341433	1.02123	-29	94.5	103
227	6113	T550	CS77304	SWE	55.8078	13.1028	Mattias Jakobsson	GMI	0.435795	0.150418	0.171877	0.269419	-0.13336	-29	132.67	89
228	6114	T570	CS77305	SWE	55.8097	13.1342	Mattias Jakobsson	GMI	0.412129	0.449061	0.16173	0.341433	1.02123	-30	97	102
229	6115	T580	CS77306	SWE	55.8	13.1367	Mattias Jakobsson	GMI	0.412129	0.449061	0.16173	0.341433	1.02123	-30	97.5	88
230	6118	T610	CS77307	SWE	55.7	13.2	Mattias Jakobsson	GMI	0.449562	0.330934	0.273207	0.219032	0.191688	-27	98.25	139
231	6119	T620	CS78060	SWE	55.7	13.2	Mattias Jakobsson	GMI	0.449562	0.330934	0.273207	0.219032	0.191688	-27	NA	109
232	6122	T670	CS77308	SWE	55.8364	13.3075	Mattias Jakobsson	GMI	0.355932	0.369807	0.130399	0.246391	1.04238	-32	101.5	106
233	6123	T680	CS78064	SWE	55.8369	13.3033	Mattias Jakobsson	GMI	0.355932	0.369807	0.130399	0.246391	1.04238	-32	NA	125
234	6124	T690	CS77309	SWE	55.8378	13.3092	Mattias Jakobsson	GMI	0.355932	0.369807	0.130399	0.246391	1.04238	-32	129.5	105
235	6125	T710	CS77310	SWE	55.8403	13.3106	Mattias Jakobsson	GMI	0.355932	0.369807	0.130399	0.246391	1.04238	-32	106.25	121
236	6126	T720	CS77311	SWE	55.8411	13.3047	Mattias Jakobsson	GMI	0.355932	0.369807	0.130399	0.246391	1.04238	-32	103.25	107
237	6128	T740	CS77313	SWE	55.8397	13.2881	Mattias Jakobsson	GMI	0.355932	0.369807	0.130399	0.246391	1.04238	-31	122.33	121
238	6131	T780	CS77315	SWE	55.8369	13.3181	Mattias Jakobsson	GMI	0.355932	0.369807	0.130399	0.246391	1.04238	-32	119	118
239	6132	T790	CS77316	SWE	55.8386	13.3186	Mattias Jakobsson	GMI	0.355932	0.369807	0.130399	0.246391	1.04238	-32	106	128
240	6133	T800	CS77317	SWE	55.8364	13.2906	Mattias Jakobsson	GMI	0.355932	0.369807	0.130399	0.246391	1.04238	-31	111.75	126
241	6134	T810	CS77318	SWE	55.8383	13.2906	Mattias Jakobsson	GMI	0.355932	0.369807	0.130399	0.246391	1.04238	-31	110	117
242	6136	T840	CS77319	SWE	55.9336	13.5519	Mattias Jakobsson	GMI	0.410723	0.229878	0.0894008	0.244806	0.944419	-32	96.5	142
243	6137	T850	CS77320	SWE	55.9419	13.5603	Mattias Jakobsson	GMI	0.410723	0.229878	0.0894008	0.244806	0.944419	-32	92.5	97
244	6138	T860	CS77321	SWE	55.9403	13.5511	Mattias Jakobsson	GMI	0.410723	0.229878	0.0894008	0.244806	0.944419	-32	97	113
245	6140	T880	CS77322	SWE	55.9392	13.5539	Mattias Jakobsson	GMI	0.410723	0.229878	0.0894008	0.244806	0.944419	-32	98.75	102
246	6141	T890	CS78079	SWE	55.9414	13.5542	Mattias Jakobsson	GMI	0.410723	0.229878	0.0894008	0.244806	0.944419	-32	NA	111
247	6142	T900	CS77323	SWE	55.9428	13.5558	Mattias Jakobsson	GMI	0.410723	0.229878	0.0894008	0.244806	0.944419	-32	98.5	128
248	6145	T930	CS77324	SWE	55.9497	13.5533	Mattias Jakobsson	GMI	0.410723	0.229878	0.0894008	0.244806	0.944419	-32	116	136
249	6148	T960	CS77325	SWE	55.9319	13.5508	Mattias Jakobsson	GMI	0.410723	0.229878	0.0894008	0.244806	0.944419	-32	105	119
250	6149	T970	CS77326	SWE	55.9281	13.5481	Mattias Jakobsson	GMI	0.410723	0.229878	0.0894008	0.244806	0.944419	-32	106	100
251	6150	T980	CS77327	SWE	55.9261	13.5319	Mattias Jakobsson	GMI	0.299032	0.0850816	0.139243	0.282655	-0.492611	-33	111.33	125
252	6151	T990	CS77328	SWE	55.6528	13.2244	Mattias Jakobsson	GMI	0.449562	0.330934	0.273207	0.219032	0.191688	-26	99.5	103
253	6153	TAA 03	CS77329	SWE	62.6425	17.7422	Mattias Jakobsson	GMI	0.437178	0.552083	0.0983135	0.253635	1.72554	-126	149.25	147
254	6154	TAA 04	CS77330	SWE	62.6422	17.7406	Mattias Jakobsson	GMI	0.437178	0.552083	0.0983135	0.253635	1.72554	-126	149.33	160
255	6163	TAA 14	CS77331	SWE	62.6425	17.7356	Mattias Jakobsson	GMI	0.437178	0.552083	0.0983135	0.253635	1.72554	-126	157.5	164
256	6166	TAA 17	CS77332	SWE	62.6425	17.7372	Mattias Jakobsson	GMI	0.437178	0.552083	0.0983135	0.253635	1.72554	-126	144	164
257	6169	T√ÖD 01	CS77333	SWE	62.8714	18.3447	Mattias Jakobsson	GMI	0.392236	0.56403	0.462361	0.733175	0.198761	-126	116	148
258	6172	T√ÖD 04	CS77335	SWE	62.8717	18.3436	Mattias Jakobsson	GMI	0.392236	0.56403	0.462361	0.733175	0.198761	-126	110.5	146
259	6173	T√ÖD 05	CS77336	SWE	62.8717	18.3419	Mattias Jakobsson	GMI	0.392236	0.56403	0.462361	0.733175	0.198761	-126	91.75	146
260	6174	T√ÖD 06	CS77337	SWE	62.8719	18.3422	Mattias Jakobsson	GMI	0.392236	0.56403	0.462361	0.733175	0.198761	-126	100	155
261	6177	T√ÑL 03	CS77338	SWE	62.6322	17.69	Mattias Jakobsson	GMI	0.517027	0.356643	0.0757576	0.213367	1.5492	-129	99	173
262	6180	T√ÑL 07	CS77339	SWE	62.6322	17.6906	Mattias Jakobsson	GMI	0.517027	0.356643	0.0757576	0.213367	1.5492	-129	71	27
263	6184	TB√ñ 01	CS77343	SWE	62.8892	18.4522	Mattias Jakobsson	GMI	NA	NA	NA	NA	NA	-126	93.67	148
264	6188	TDr-1	CS77345	SWE	55.7683	14.1386	Mattias Jakobsson	GMI	0.583063	0.819827	0.591458	0.710687	0.326504	-26	73.25	71
265	6189	TDr-2	CS77351	SWE	55.7686	14.1383	Mattias Jakobsson	GMI	0.583063	0.819827	0.591458	0.710687	0.326504	-26	74	87
266	6191	TDr-4	CS77352	SWE	55.7689	14.1375	Mattias Jakobsson	GMI	0.583063	0.819827	0.591458	0.710687	0.326504	-26	78.33	62
267	6192	TDr-5	CS77353	SWE	55.7692	14.1369	Mattias Jakobsson	GMI	0.583063	0.819827	0.591458	0.710687	0.326504	-26	95	82
268	6193	TDr-7	CS77354	SWE	55.7694	14.1347	Mattias Jakobsson	GMI	0.583063	0.819827	0.591458	0.710687	0.326504	-26	83	98
269	6194	TDr-8	CS77355	SWE	55.7706	14.1342	Mattias Jakobsson	GMI	0.583063	0.819827	0.591458	0.710687	0.326504	-26	110.5	79
270	6195	TDr-9	CS77356	SWE	55.7708	14.1342	Mattias Jakobsson	GMI	0.583063	0.819827	0.591458	0.710687	0.326504	-26	83.75	95
271	6198	TDr-13	CS77347	SWE	55.7708	14.1331	Mattias Jakobsson	GMI	0.583063	0.819827	0.591458	0.710687	0.326504	-26	88.25	88
272	6201	TDr-16	CS77348	SWE	55.7719	14.1211	Mattias Jakobsson	GMI	0.583063	0.819827	0.591458	0.710687	0.326504	-28	94.25	119
273	6202	TDr-17	CS77349	SWE	55.7717	14.1206	Mattias Jakobsson	GMI	0.583063	0.819827	0.591458	0.710687	0.326504	-28	109.75	98
274	6203	TDr-18	CS77350	SWE	55.7714	14.1208	Mattias Jakobsson	GMI	0.583063	0.819827	0.591458	0.710687	0.326504	-28	108	72
275	6209	TEDEN 02	CS77358	SWE	62.8836	18.1842	Mattias Jakobsson	GMI	0.327529	0.405959	0.176882	0.298952	0.830769	-129	94	165
276	6210	TEDEN 03	CS77359	SWE	62.8839	18.1836	Mattias Jakobsson	GMI	0.327529	0.405959	0.176882	0.298952	0.830769	-129	100.75	167
277	6214	TF√Ñ 04	CS78121	SWE	63.0175	18.3281	Mattias Jakobsson	GMI	0.521159	0.34375	0.213012	0.326517	0.478564	-129	NA	175
278	6216	TF√Ñ 06	CS77362	SWE	63.0167	18.3283	Mattias Jakobsson	GMI	0.521159	0.34375	0.213012	0.326517	0.478564	-129	134.5	182
279	6217	TF√Ñ 07	CS77363	SWE	63.0169	18.3283	Mattias Jakobsson	GMI	0.521159	0.34375	0.213012	0.326517	0.478564	-129	111.25	172
280	6218	TF√Ñ 08	CS77364	SWE	63.0172	18.3283	Mattias Jakobsson	GMI	0.521159	0.34375	0.213012	0.326517	0.478564	-129	124	164
281	6220	TGR 01	CS77365	SWE	62.806	18.1896	Mattias Jakobsson	GMI	0.327529	0.405959	0.176882	0.298952	0.830769	-124	103	132
282	6221	TGR 02	CS77366	SWE	62.806	18.1896	Mattias Jakobsson	GMI	0.327529	0.405959	0.176882	0.298952	0.830769	-124	108	154
283	6231	TNY 04	CS77368	SWE	62.96	18.2844	Mattias Jakobsson	GMI	0.464058	0.403992	0.0757576	0.444042	1.67386	-129	109.25	120
284	6235	TOM 01	CS77372	SWE	62.9611	18.3589	Mattias Jakobsson	GMI	0.521159	0.34375	0.213012	0.326517	0.478564	-133	119.5	170
285	6237	TOM 03	CS77373	SWE	62.9619	18.35	Mattias Jakobsson	GMI	0.521159	0.34375	0.213012	0.326517	0.478564	-133	106	132
286	6238	TOM 04	CS77374	SWE	62.9619	18.35	Mattias Jakobsson	GMI	0.521159	0.34375	0.213012	0.326517	0.478564	-133	104.5	163
287	6240	TOM 06	CS77375	SWE	62.9622	18.35	Mattias Jakobsson	GMI	0.521159	0.34375	0.213012	0.326517	0.478564	-133	98.25	162
288	6241	TOM 07	CS77376	SWE	62.9614	18.3608	Mattias Jakobsson	GMI	0.521159	0.34375	0.213012	0.326517	0.478564	-133	96.25	125
289	6242	Tomegap-2	CS77377	SWE	55.7	13.2	Mattias Jakobsson	GMI	0.449562	0.330934	0.273207	0.219032	0.191688	-27	83.67	98
290	6243	Tottarp-2	CS77381	SWE	56.2737	13.9004	Magnus Nordborg	GMI	0.439128	0.196421	0.0942685	0.246916	0.734115	-36	66.75	52
291	6244	TR√Ñ 01	CS77384	SWE	62.9169	18.4728	Mattias Jakobsson	GMI	NA	NA	NA	NA	NA	-129	90.75	153
292	6252	TV-4	CS78771	SWE	55.5796	14.3336	Mattias Jakobsson	GMI	0.630866	0.764774	0.636021	0.634422	0.18435	-20	122.75	133
293	6255	TV-7	CS78772	SWE	55.5796	14.334	Mattias Jakobsson	GMI	0.630866	0.764774	0.636021	0.634422	0.18435	-20	134	104
294	6258	TV-10	CS78767	SWE	55.5796	14.3336	Mattias Jakobsson	GMI	0.630866	0.764774	0.636021	0.634422	0.18435	-20	119.25	114
295	6268	TV-22	CS78768	SWE	55.5796	14.3336	Mattias Jakobsson	GMI	0.630866	0.764774	0.636021	0.634422	0.18435	-20	115	131
296	6276	TV-30	CS78769	SWE	55.5796	14.3336	Mattias Jakobsson	GMI	0.630866	0.764774	0.636021	0.634422	0.18435	-20	131	126
297	6284	TV-38	CS78770	SWE	55.5796	14.3336	Mattias Jakobsson	GMI	0.630866	0.764774	0.636021	0.634422	0.18435	-20	117.5	114
298	6296	UduI 1-11	CS78774	CZE	49.2771	16.6314	Jirina Relichov	Monsanto	0.469731	0.360688	0.190937	0.334166	0.636073	-56	75	36
299	6390	UduI 3-36	CS78775	CZE	49.2771	16.6314	Jirina Relichov	Monsanto	0.469731	0.360688	0.190937	0.334166	0.636073	-56	71.75	20
300	6396	UduI 4-9	CS78776	CZE	49.2771	16.6314	Jirina Relichov	Monsanto	0.469731	0.360688	0.190937	0.334166	0.636073	-56	82.75	17
301	6413	Ull3-4	CS78819	SWE	56.06	13.97	Magnus Nordborg	GMI	0.425357	0.359934	0.268271	0.212774	0.293924	-30	104.25	64
302	6424	ZdrI 1-23	CS78875	CZE	49.3853	16.2544	Jirina Relichov	Monsanto	0.545767	0.152886	0.240162	0.291123	-0.451618	-58	77	28
303	6434	ZdrI 2-9	CS78877	CZE	49.3853	16.2544	Jirina Relichov	Monsanto	0.545767	0.152886	0.240162	0.291123	-0.451618	-58	62.75	38
304	6445	ZdrI 2-21	CS78876	CZE	49.3853	16.2544	Jirina Relichov	Monsanto	0.545767	0.152886	0.240162	0.291123	-0.451618	-58	67	22
305	6680	ANH-1	CS76437	GER	51.85	6.4333	Gerhard R√∂bbelen	Salk	0.366276	0.126834	0.191485	0.207914	-0.411931	-5	99.25	56
306	6739	CSHL-15	CS79011	USA	40.8585	-73.4675	Catherine Weiss	MPI	0.252957	0.292472	0.325449	0.156003	-0.106836	-51	NA	70
307	6740	CSHL-17	CS79012	USA	40.8585	-73.4675	Catherine Weiss	MPI	0.252957	0.292472	0.325449	0.156003	-0.106836	-51	NA	73
308	6744	CSHL-5	CS76779	USA	40.8585	-73.4675	Catherine Weiss	Monsanto	0.252957	0.292472	0.325449	0.156003	-0.106836	-51	63.25	19
309	6749	FM-10	CS79013	USA	42.4489	-76.5072	Michael Nachman	MPI	0.338432	0.22789	0.240436	0.303359	-0.0535921	-92	NA	73
310	6750	FM-11	CS79014	USA	42.4489	-76.5072	Michael Nachman	MPI	0.338432	0.22789	0.240436	0.303359	-0.0535921	-92	NA	70
311	6805	HS-12	CS79015	USA	42.373	-71.0627	Toby Kellogg	MPI	0.518678	0.450912	0.565268	0.521653	-0.226028	-77	NA	70
312	6806	HS-17	CS79016	USA	42.373	-71.0627	Toby Kellogg	MPI	0.518678	0.450912	0.565268	0.521653	-0.226028	-77	NA	69
313	6814	KNO-15	CS79017	USA	41.2816	-86.621	Joy Bergelson	MPI	0.34204	0.268271	0.215549	0.379918	0.218808	-97	NA	70
314	6830	Kz-13	CS76994	KAZ	49.5	73.1	Ihsan Al-Shehbaz	MPI	0.315915	0.390717	0.244344	0.288255	0.469407	-200	69.75	54
315	6897	Ag-0	CS76430	FRA	45	1.3	Albert Kranz	Salk	0.162219	0.0974222	0.160222	0.178776	-0.497507	3	68	30
316	6898	An-1	CS76435	BEL	51.2167	4.4	Albert Kranz	Salk	0.358679	0.304333	0.238996	0.252314	0.241674	0	57.5	53
317	6900	Bil-5	CS76709	SWE	63.324	18.484	Magnus Nordborg	GMI	0.327536	0.537806	0.191691	0.231406	1.03161	-138	116	130
318	6901	Bil-7	CS76710	SWE	63.324	18.484	Magnus Nordborg	GMI	0.327536	0.537806	0.191691	0.231406	1.03161	-138	95.5	127
319	6903	Bor-4	CS76454	CZE	49.4013	16.2326	Jirina Relichov	Salk	0.474038	0.271905	0.322227	0.379483	-0.169804	-59	81.5	51
320	6904	Br-0	CS76455	CZE	49.2	16.6166	Albert Kranz	Salk	0.5948	0.440834	0.34396	0.406131	0.248142	-49	72.25	60
321	6907	CIBC-17	CS76770	UK	51.4083	-0.6383	Mick Crawley	Salk	0.329528	0.08611	0.208213	0.223561	-0.882938	-4	72	63
322	6908	CIBC-5	CS78894	UK	51.4083	-0.6383	Mick Crawley	Salk	0.329528	0.08611	0.208213	0.223561	-0.882938	-4	66	46
323	6909	Col-0	CS76778	USA	38.3	-92.3	Albert Kranz	GMI	0.324116	0.113396	0.353284	0.366788	-1.13638	-75	70.5	0
324	6911	Cvi-0	CS76789	CPV	15.1111	-23.6167	Albert Kranz	Salk	0.579961	0.520088	0.570204	0.377035	-0.0919972	167	62.75	82
325	6913	Eden-2	CS76827	SWE	62.877	18.177	Magnus Nordborg	GMI	0.327529	0.405959	0.176882	0.298952	0.830769	-129	120.67	147
326	6915	Ei-2	CS76478	GER	50.3	6.3	Albert Kranz	Salk	0.503822	0.250857	0.137598	0.171642	0.600549	-29	76.5	41
327	6917	F√§b-2	CS76850	SWE	63.0165	18.3174	Magnus Nordborg	GMI	0.521159	0.34375	0.213012	0.326517	0.478564	-129	144	129
328	6918	F√§b-4	CS76851	SWE	63.0165	18.3174	Magnus Nordborg	GMI	0.521159	0.34375	0.213012	0.326517	0.478564	-129	123	137
329	6919	Ga-0	CS76490	GER	50.3	8	Albert Kranz	Salk	0.506175	0.18696	0.246332	0.253829	-0.275785	-26	76.75	41
330	6920	Got-22	CS76884	GER	51.5338	9.9355	Gerhard R√∂bbelen	Salk	0.605426	0.326203	0.250377	0.167125	0.264552	-32	86.75	90
331	6922	Gu-0	CS76498	GER	50.3	8	Albert Kranz	Salk	0.506175	0.18696	0.246332	0.253829	-0.275785	-26	71	49
332	6923	HR-10	CS76940	UK	51.4083	-0.6383	Mick Crawley	Salk	0.329528	0.08611	0.208213	0.223561	-0.882938	-4	57	41
333	6924	HR-5	CS76514	UK	51.4083	-0.6383	Mick Crawley	Salk	0.329528	0.08611	0.208213	0.223561	-0.882938	-4	61.5	52
334	6926	Kin-0	CS76527	USA	44.46	-85.37	Albert Kranz	Salk	0.221659	0.27924	0.281846	0.24347	-0.00928648	-127	66.25	45
335	6927	KNO-10	CS76973	USA	41.2816	-86.621	Joy Bergelson	Salk,MPI	0.34204	0.268271	0.215549	0.379918	0.218808	-97	73.5	75
336	6929	Kondara	CS76532	TJK	38.48	68.49	Igor Vizir	Salk	0.333676	0.435349	0.300562	0.232538	0.370493	-27	78.5	58
337	6931	Kz-9	CS76537	KAZ	49.5	73.1	Ihsan Al-Shehbaz	Salk	0.315915	0.390717	0.244344	0.288255	0.469407	-200	59.75	64
338	6932	Ler-1	CS77021	GER	47.984	10.8719	Eric Holub	MPI,GMI	0.544332	0.249143	0.417112	0.329915	-0.515328	-44	63.5	84
339	6933	LL-0	CS77047	ESP	41.59	2.49	Albert Kranz	Salk	NA	NA	NA	NA	NA	43	63.75	48
340	6938	Ms-0	CS76555	RUS	55.7522	37.6322	Albert Kranz	Salk	0.269047	0.426368	0.3925	0.520664	0.0827666	-122	72	39
341	6940	Mz-0	CS76557	GER	50.3	8.3	Albert Kranz	Salk	0.3454	0.200466	0.221788	0.228752	-0.101076	-29	64.25	43
342	6943	NFA-10	CS77126	UK	51.4083	-0.6383	Mick Crawley	Salk	0.329528	0.08611	0.208213	0.223561	-0.882938	-4	60.75	47
343	6944	NFA-8	CS78913	UK	51.4083	-0.6383	Mick Crawley	Salk	0.329528	0.08611	0.208213	0.223561	-0.882938	-4	63.75	64
344	6945	Nok-3	CS76562	NED	52.24	4.45	Albert Kranz	Salk	0.395478	0.203277	0.148978	0.24339	0.310768	3	76.5	60
345	6951	Pu2-23	CS76579	CZE	49.42	16.36	Ivo Cetl	Salk	0.423193	0.245167	0.195393	0.392259	0.226926	-56	79.5	73
346	6956	Pu2-7	CS76580	CZE	49.42	16.36	Ivo Cetl	Salk	0.423193	0.245167	0.195393	0.392259	0.226926	-56	84.5	45
347	6957	Pu2-8	CS77192	CZE	49.42	16.36	Ivo Cetl	Salk	0.423193	0.245167	0.195393	0.392259	0.226926	-56	81.25	25
348	6958	Ra-0	CS76582	FRA	46	3.3	Albert Kranz	Salk	0.36979	0.354929	0.255245	0.326854	0.329696	-12	68.75	55
349	6959	Rennes-1	CS77210	FRA	48.5	-1.41	Gerhard R√∂bbelen	Salk	0.213882	0.160359	0.1075	0.101502	0.399923	20	71.75	76
350	6960	Rennes-11	CS77211	FRA	48.5	-1.41	Gerhard R√∂bbelen	Salk	0.213882	0.160359	0.1075	0.101502	0.399923	20	55	54
351	6961	Se-0	CS76597	ESP	38.3333	-3.53333	Albert Kranz	Salk	0.308841	0.272933	0.252022	0.164661	0.0797078	23	59	46
352	6963	Sorbo	CS78917	TJK	38.35	68.48	Igor Vizir	Salk	0.401357	0.290758	0.238174	0.40439	0.199492	-16	78.75	64
353	6966	Sq-1	CS77266	UK	51.4083	-0.6383	Mick Crawley	Salk	0.329528	0.08611	0.208213	0.223561	-0.882938	-4	62.25	46
354	6967	Sq-8	CS76604	UK	51.4083	-0.6383	Mick Crawley	Salk	0.329528	0.08611	0.208213	0.223561	-0.882938	-4	62.75	73
355	6968	Tamm-2	CS76610	FIN	60	23.5	Outi Savolainen	Salk,GMI	0.31949	0.32146	0.140477	0.327847	0.827827	-88	92.5	99
356	6969	Tamm-27	CS77341	FIN	60	23.5	Outi Savolainen	Salk	0.31949	0.32146	0.140477	0.327847	0.827827	-88	91.25	114
357	6970	Ts-1	CS76615	ESP	41.7194	2.93056	Albert Kranz	Salk	NA	NA	NA	NA	NA	52	62.5	46
358	6971	Ts-5	CS77388	ESP	41.7194	2.93056	Albert Kranz	Salk	NA	NA	NA	NA	NA	52	66.25	57
359	6973	Ull2-3	CS78817	SWE	56.0648	13.9707	Magnus Nordborg	GMI	0.425357	0.359934	0.268271	0.212774	0.293924	-30	77.25	80
360	6974	Ull2-5	CS78818	SWE	56.0648	13.9707	Magnus Nordborg	GMI	0.425357	0.359934	0.268271	0.212774	0.293924	-30	108.75	100
361	6975	Uod-1	CS76621	AUT	48.3	14.45	Marcus Koch	Salk	0.502001	0.468874	0.23646	0.218587	0.684557	-53	67.25	45
362	6976	Uod-7	CS78823	AUT	48.3	14.45	Marcus Koch	Salk	0.502001	0.468874	0.23646	0.218587	0.684557	-53	71.25	60
363	6979	Wei-0	CS76628	SUI	47.25	8.26	Alan Slusarenko	Salk	0.507374	0.200398	0.214726	0.246675	-0.0690613	-30	54.75	41
364	6981	Ws-2	CS78920	RUS	52.3	30	Kenneth Feldmann	MPI,Salk	0.441378	0.289113	0.0643082	0.230614	1.50313	-101	62.25	58
365	6982	Wt-5	CS76632	GER	52.3	9.3	Albert Kranz	Salk	0.362608	0.242424	0.274373	0.17697	-0.123798	-22	78.5	29
366	6984	Zdr-1	CS76635	CZE	49.3853	16.2544	Jirina Relichov	Salk	0.545767	0.152886	0.240162	0.291123	-0.451618	-58	69.25	28
367	6986	Abd-0	CS76429	UK	57.1539	-2.2207	R. Mitchelson	Salk	0.535496	0.279108	0.109968	0.110488	0.931404	-7	61.5	42
368	6987	Ak-1	CS76431	GER	48.0683	7.62551	Albert Kranz	Salk	0.472696	0.4348	0.24407	0.374582	0.577434	-14	69	48
369	6989	Alst-1	CS76432	UK	54.8	-2.4333	Maarten Koornneef	Salk	0.4215	0.145276	0.0947484	0.212507	0.427413	-17	78.25	57
370	6990	Amel-1	CS76434	NED	53.448	5.73	Maarten Koornneef	Salk	NA	NA	NA	NA	NA	-7	79	68
371	6992	Ang-0	CS76436	BEL	50.3	5.3	Albert Kranz	Salk	0.384174	0.101056	0.15508	0.223625	-0.42827	-13	68	49
372	6997	Appt-1	CS76440	NED	51.8333	5.5833	Maarten Koornneef	Salk	0.395979	0.175031	0.163102	0.178631	0.0705889	-5	81	55
373	7000	Aa-0	CS76428	GER	50.9167	9.57073	Albert Kranz	Salk	0.299598	0.133896	0.221582	0.197066	-0.503734	-38	78	42
374	7002	Baa-1	CS76442	NED	51.3333	6.1	Maarten Koornneef	Salk	0.445311	0.224942	0.059372	0.298374	1.33202	-3	80.25	56
375	7003	Bs-1	CS78888	SUI	47.5	7.5	Albert Kranz	Salk	0.559003	0.11943	0.219731	0.189487	-0.609678	-18	71.75	54
376	7008	Benk-1	CS76447	NED	52	5.675	Maarten Koornneef	Salk	0.540973	0.200603	0.21123	0.185906	-0.0516179	-7	95.5	50
377	7013	Bd-0	CS76445	GER	52.4584	13.287	Albert Kranz	Salk	0.436386	0.432127	0.621898	0.512288	-0.364057	-33	63	46
378	7014	Ba-1	CS76441	UK	56.5459	-4.79821	Albert Kranz	Salk	0.583916	0.310572	0.300768	0.253255	0.0320763	-22	81.5	38
379	7025	Bl-1	CS76450	ITA	44.5041	11.3396	Albert Kranz	Salk	0.435632	0.251063	0.413616	0.422646	-0.499235	-6	71.5	49
380	7026	Boot-1	CS76452	UK	54.4	-3.2667	Maarten Koornneef	Salk	0.5139	0.293638	0.267105	0.327778	0.0947033	-8	69	34
381	7028	Bch-1	CS76444	GER	49.5166	9.3166	Albert Kranz	Salk	0.345584	0.252708	0.427053	0.230344	-0.524674	-29	57.5	51
382	7031	Bsch-0	CS76457	GER	50.0167	8.6667	Albert Kranz	Salk	0.395405	0.303236	0.267174	0.322769	0.126611	-22	78.25	41
383	7033	Buckhorn Pass	CS76733	USA	41.3599	-122.755	Angus Murphy	Salk,MPI	0.382267	0.336144	0.490196	0.39475	-0.377265	-55	78.75	49
384	7036	Bu-0	CS78889	GER	50.5	9.5	Albert Kranz	MPI,Salk	0.575059	0.236734	0.168655	0.155938	0.339082	-43	67.75	53
385	7058	Bur-0	CS76734	IRL	54.1	-6.2	Albert Kranz	Mott	0.601313	0.283902	0.179761	0.285062	0.457	11	87.25	86
386	7061	Cal-0	CS76460	UK	53.2699	-1.64293	Albert Kranz	Salk	0.389869	0.0802825	0.0623886	0.087916	0.252169	5	87.25	101
387	7062	Ca-0	CS76459	GER	50.2981	8.26607	Albert Kranz	Salk	0.3454	0.200466	0.221788	0.228752	-0.101076	-24	62.25	51
388	7063	Can-0	CS76740	ESP	29.2144	-13.4811	Albert Kranz	Mott	0.681433	0.705577	0.488746	0.460907	0.367173	128	72.25	59
389	7064	Cnt-1	CS76467	UK	51.3	1.1	Eric Holub	Salk	0.50719	0.127108	0.244755	0.215273	-0.65522	13	68.33	45
390	7067	Ct-1	CS76786	ITA	37.3	15	Albert Kranz	Mott	0.572557	0.358426	0.443576	0.32101	-0.213147	61	58.75	60
391	7068	Cerv-1	CS76462	ITA	42	12.1	Maarten Koornneef	Salk	0.371294	0.115179	0.197038	0.417375	-0.536911	49	63.75	26
392	7071	Chat-1	CS76463	FRA	48.0717	1.33867	Maarten Koornneef	Salk	0.489343	0.166255	0.205334	0.354414	-0.211113	1	64.25	50
393	7072	Chi-0	CS76464	RUS	53.7502	34.7361	Albert Kranz	Salk	0.403006	0.15508	0.156726	0.333903	-0.0105542	-120	70.25	44
394	7077	Co-1	CS76468	POR	40.12	-8.25	Albert Kranz	Salk	0.158328	0.0741807	0.232209	0.234679	-1.14113	45	54.5	41
395	7081	Co	CS78895	POR	40.2077	-8.42639	George Redei	Salk	0.314278	0.369944	0.274647	0.309622	0.297865	58	58.5	39
396	7092	Com-1	CS76469	FRA	49.416	2.823	Maarten Koornneef	Salk	0.631744	0.225696	0.373646	0.251703	-0.50412	0	68	59
397	7094	Da-0	CS76791	GER	49.8724	8.65081	Albert Kranz	Monsanto	0.394925	0.267928	0.244961	0.382149	0.0896202	-26	67.25	30
398	7096	Di-G	CS76472	FRA	47.3239	5.04278	Maarten Koornneef	Salk	0.500111	0.177499	0.329837	0.298976	-0.619633	-14	65.5	72
399	7102	Do-0	CS76474	GER	50.7224	8.2372	Albert Kranz	Salk	0.45458	0.284039	0.151104	0.207918	0.631146	-28	87.25	49
400	7103	Dra-0	CS76476	CZE	49.4167	16.2667	Albert Kranz	Salk	0.474038	0.271905	0.322227	0.379483	-0.169804	-60	62.25	42
401	7106	Dr-0	CS78897	GER	51.051	13.7336	Albert Kranz	MPI,Salk	0.50575	0.32778	0.251474	0.235418	0.265003	-30	76.5	48
402	7107	Durh-1	CS76477	UK	54.7761	-1.5733	Maarten Koornneef	Salk	0.570337	0.246812	0.219868	0.241938	0.115598	3	67.25	37
403	7109	Ema-1	CS76480	UK	51.3	0.5	Eric Holub	Salk	0.648284	0.244824	0.278281	0.336718	-0.128091	6	60.75	43
404	7111	Edi-0	CS76831	UK	55.9494	-3.16028	Albert Kranz	Mott	0.449532	0.33587	0.181475	0.208523	0.615604	0	86	73
405	7117	El-0	CS76479	GER	51.5105	9.68253	Albert Kranz	Salk	0.608987	0.365693	0.171534	0.285066	0.757011	-31	58	62
406	7119	En-2	CS76481	GER	50	8.5	Albert Kranz	Salk	0.413993	0.191828	0.240985	0.160467	-0.228135	-22	65.5	43
407	7120	En-D	CS76482	GER	50	8.5	Albert Kranz	Salk	0.413993	0.191828	0.240985	0.160467	-0.228135	-22	62.5	57
408	7125	Er-0	CS78898	GER	49.5955	11.0087	Albert Kranz	MPI,Salk	0.30468	0.349925	0.277595	0.361376	0.231555	-34	69.25	67
409	7126	Es-0	CS76484	FIN	60.1997	24.5682	Albert Kranz	Salk	0.414236	0.283435	0.148087	0.276202	0.649183	-90	95.5	87
410	7127	Est	CS76485	EST	58.6656	24.9871	Brigitte Damm	Salk	0.374893	0.306891	0.0574524	0.274533	1.67554	-91	59.75	51
411	7130	Et-0	CS76486	FRA	44.6447	2.56481	Albert Kranz	Salk	0.148207	0.0950912	0.304059	0.229633	-1.16238	0	91.67	51
412	7133	Fr-2	CS76489	GER	50.1102	8.6822	Albert Kranz	Salk	0.395405	0.303236	0.267174	0.322769	0.126611	-17	76	55
413	7138	Fi-0	CS76488	GER	50.5	8.0167	Albert Kranz	Salk	0.513395	0.337104	0.189702	0.206123	0.574935	-19	85.5	85
414	7143	Gel-1	CS76492	NED	51.0167	5.86667	Maarten Koornneef	Salk	0.369965	0.108254	0.238448	0.273479	-0.789666	-1	83	48
415	7147	Gie-0	CS76493	GER	50.584	8.67825	Albert Kranz	Salk	0.441056	0.15748	0.274647	0.210648	-0.556189	-23	74.5	49
416	7158	Gr-5	CS76885	AUT	47	15.5	Albert Kranz	Monsanto	0.452969	0.288701	0.261826	0.385644	0.0977115	-67	63.33	40
417	7160	Gre-0	CS76497	USA	43.178	-85.2532	Albert Kranz	Salk	0.50003	0.110723	0.231181	0.19488	-0.736171	-106	72.25	57
418	7161	Gd-1	CS76491	GER	53.5	10.5	Albert Kranz	Salk	0.521163	0.346634	0.175099	0.262833	0.682915	-30	61.25	16
419	7162	Hs-0	CS76515	GER	52.24	9.44	Albert Kranz	Salk	0.371088	0.229124	0.312423	0.282659	-0.310095	-25	65	73
420	7163	Ha-0	CS76500	GER	52.3721	9.73569	Albert Kranz	Salk	0.394531	0.379748	0.338887	0.133657	0.113842	-21	66.5	55
421	7164	Hau-0	CS76915	DEN	55.675	12.5686	Albert Kranz	Salk	0.42297	0.524955	0.431373	0.35083	0.196341	-19	69.75	63
422	7165	Hn-0	CS76513	GER	51.3472	8.28844	Albert Kranz	Salk	0.565444	0.253531	0.0850816	0.269141	1.09187	-24	71.5	80
423	7169	Hh-0	CS76512	GER	54.4175	9.88682	Albert Kranz	Salk	0.5151	0.253257	0.237762	0.233948	0.0631318	-18	82.5	72
424	7177	Jm-0	CS76520	CZE	49	15	Albert Kranz	Salk	0.339478	0.111271	0.249486	0.392366	-0.807433	-58	65.75	48
425	7181	Je-0	CS76518	GER	50.927	11.587	Albert Kranz	Salk	0.525448	0.210407	0.26402	0.210507	-0.226981	-26	96.75	75
426	7183	Kas-1	CS79018	IND	35	77	Shauna Somerville	Salk	0.238242	0.259153	0.117441	0.174038	0.791478	-272	NA	63
427	7186	Kn-0	CS76969	LTU	54.8969	23.8924	Albert Kranz	Mott	0.420665	0.426916	0.231043	0.298899	0.613982	-78	75	66
428	7192	Kil-0	CS76526	UK	55.6395	-5.66364	Albert Kranz	Salk	0.681043	0.369258	0.0708899	0.405585	1.65037	2	68.75	71
429	7199	Kl-5	CS76528	GER	50.95	6.9666	Albert Kranz	Salk	0.456829	0.203414	0.275058	0.257174	-0.301739	-8	66.5	48
430	7202	Kb-0	CS76524	GER	50.1797	8.50861	Albert Kranz	Salk	0.575659	0.300288	0.351501	0.424109	-0.157472	-27	63	47
431	7203	Krot-0	CS76534	GER	49.631	11.5722	Thomas Mitchell-Olds	Salk	0.627532	0.298368	0.196833	0.320615	0.415975	-39	67.25	69
432	7207	Kyoto	CS76535	JPN	35.0085	135.752	Hirokazu Tsukaya	Salk	0.541251	0.574112	0.506307	0.47413	0.125681	2	70.25	39
433	7208	Lan-0	CS76539	UK	55.6739	-3.78181	Albert Kranz	Salk	0.451075	0.119155	0.0804881	0.259368	0.392318	-9	73	16
434	7209	La-0	CS76538	POL	52.7333	15.2333	Albert Kranz	Salk	0.710639	0.289319	0.263677	0.348563	0.0928015	-51	63.5	65
435	7213	Ler-0	CS77020	GER	47.984	10.8719	Maarten Koornneef	Mott	0.544332	0.249143	0.417112	0.329915	-0.515328	-44	65.5	72
436	7217	Lm-2	CS76545	FRA	48	0.5	Albert Kranz	Salk	0.305661	0.138146	0.205471	0.207259	-0.396993	2	56.5	64
437	7218	Le-0	CS76540	NED	52.1611	4.49015	Albert Kranz	Salk	0.31505	0.180173	0.240779	0.139968	-0.289963	2	75	43
438	7223	Li-2:1	CS76541	GER	50.3833	8.0666	Albert Kranz	Salk	0.405196	0.230906	0.217606	0.237935	0.0593265	-17	75.75	45
439	7231	Li-7	CS77035	GER	50.3833	8.0666	Albert Kranz	Monsanto	0.405196	0.230906	0.217606	0.237935	0.0593265	-17	65.75	44
440	7236	Litva	CS76543	LTU	NA	NA	Igor Vizir	Salk	NA	NA	NA	NA	NA	NA	73.5	68
441	7244	Mnz-0	CS76552	GER	50.001	8.26664	Albert Kranz	Salk	0.479385	0.376457	0.347045	0.282788	0.0813487	-17	68	45
442	7248	Mv-0	CS76556	USA	41.3923	-70.6652	Albert Kranz	Salk	0.4852	0.307075	0.158645	0.235208	0.660422	-53	71.5	53
443	7250	Me-0	CS76549	GER	51.9183	10.1138	Albert Kranz	Salk	0.391917	0.217263	0.199781	0.330311	0.0838894	-28	58	25
444	7255	Mh-0	CS76550	POL	50.95	20.5	Albert Kranz	Salk	0.481429	0.379405	0.280063	0.311925	0.303589	-86	62	34
445	7258	Nw-0	CS76564	GER	50.5	8.5	Albert Kranz	Salk	0.447865	0.187509	0.297546	0.239143	-0.461743	-28	71	48
446	7268	Np-0	CS76563	GER	52.6969	10.981	Albert Kranz	Salk	0.548523	0.284862	0.409434	0.23541	-0.362769	-25	65.75	57
447	7273	No-0	CS77128	GER	51.0581	13.2995	Albert Kranz	Mott	0.612822	0.408405	0.244961	0.267909	0.511161	-37	77	60
448	7276	Ob-0	CS76566	GER	50.2	8.5833	Albert Kranz	Salk	0.575659	0.300288	0.351501	0.424109	-0.157472	-24	73.75	43
449	7280	Old-1	CS76567	GER	53.1667	8.2	Albert Kranz	Salk	0.530462	0.251131	0.246812	0.287111	0.0173486	-17	80.75	87
450	7282	Or-0	CS76568	GER	50.3827	8.01161	Albert Kranz	Salk	0.506175	0.18696	0.246332	0.253829	-0.275785	-17	62.5	59
451	7287	Ove-0	CS76569	GER	53.3422	8.42255	Albert Kranz	Salk	0.522633	0.231798	0.308309	0.341882	-0.285239	-16	71	56
452	7288	Oy-0	CS77156	NOR	60.3855	6.19302	Albert Kranz	Mott	0.443406	0.407634	0.337995	0.577801	0.187338	-30	82.5	73
453	7296	Petergof	CS77170	RUS	59	29	Igor Vizir	Monsanto	0.651394	0.261801	0.050665	0.314676	1.64235	-106	84.25	62
454	7298	Pi-0	CS76572	AUT	47.04	10.51	Albert Kranz	Salk	0.568242	0.734951	0.535308	0.380055	0.316962	-107	81.75	47
455	7305	Pt-0	CS78915	GER	53.476	10.6065	Albert Kranz	Salk	0.347161	0.317016	0.221788	0.286396	0.357231	-29	79.25	74
456	7306	Pog-0	CS76576	CAN	49.2655	-123.206	Albert Kranz	Salk	0.430622	0.585146	0.379039	0.513244	0.434223	0	76.5	51
457	7307	Pn-0	CS77182	FRA	48.0653	-2.96591	Albert Kranz	Monsanto	0.300104	0.098999	0.15364	0.268631	-0.439505	28	78.5	54
458	7314	Ragl-1	CS76583	UK	54.3512	-3.41697	Maarten Koornneef	Salk	0.427688	0.101193	0.0478541	0.229349	0.748872	1	66	51
459	7316	Rhen-1	CS78916	NED	51.9667	5.56667	Maarten Koornneef	Salk	0.40601	0.0577951	0.155971	0.392298	-0.992768	-8	81.25	69
460	7319	Rome-1	CS76590	ITA	42	12.1	Maarten Koornneef	Salk	0.371294	0.115179	0.197038	0.417375	-0.536911	49	58.5	35
461	7320	Rou-0	CS76591	FRA	49.4424	1.09849	Albert Kranz	Salk	0.29428	0.344783	0.325792	0.437676	0.0566556	7	80.75	41
462	7322	Rsch-4	CS77222	RUS	56.3	34	Albert Kranz	Mott	0.517521	0.278212	0.0946798	0.150289	1.07788	-126	76.5	56
463	7323	Rubezhnoe-1	CS76594	UKR	49	38.28	Igor Vizir	Salk	0.387662	0.369738	0.149733	0.294314	0.903944	-94	75.75	60
464	7327	Sf-1	CS77246	ESP	41.7833	3.03333	F. Laibach	Salk	0.696611	0.623367	0.756726	0.751497	-0.193865	55	64.5	58
465	7328	Sf-2	CS77247	ESP	41.7833	3.03333	Albert Kranz	Mott	0.696611	0.623367	0.756726	0.751497	-0.193865	55	56.25	70
466	7332	Seattle-0	CS76598	USA	47	-122.2	Rick Amasino	Salk	0.396493	0.272179	0.0592349	0.307694	1.52495	-8	64	45
467	7333	Sei-0	CS76599	ITA	46.5438	11.5614	Albert Kranz	Salk	0.62425	0.19313	0.18127	0.105902	0.0633796	-77	68.75	60
468	7337	Si-0	CS76601	GER	50.8738	8.02341	Albert Kranz	Salk	0.529369	0.412656	0.218154	0.246775	0.637411	-24	74.5	45
469	7342	Su-0	CS76606	UK	53.6473	-3.00733	Albert Kranz	Salk	0.310186	0.11086	0.0799397	0.285536	0.326993	2	83	78
470	7343	Sp-0	CS76603	GER	52.5339	13.181	Albert Kranz	Salk	0.50803	0.221925	0.238516	0.235296	-0.0720979	-32	72	69
471	7344	Sg-1	CS76600	GER	47.6667	9.5	Albert Kranz	Salk	0.551038	0.385301	0.0503908	0.136432	2.03422	-33	73.5	36
472	7346	Sten-0	CS77277	GER	52.6058	11.8558	Albert Kranz	Monsanto	0.410689	0.240642	0.243316	0.219116	-0.0110498	-24	78.25	55
473	7347	Stw-0	CS76605	RUS	52	36	Albert Kranz	Salk	0.409661	0.47621	0.132182	0.37737	1.28168	-120	64.75	80
474	7349	Ta-0	CS76608	CZE	49.5	14.5	Albert Kranz	Salk	0.606236	0.218977	0.214041	0.246056	0.0228002	-57	81.25	55
475	7350	Tac-0	CS76609	USA	47.2413	-122.459	Thomas Mitchell-Olds	Salk	0.597726	0.290347	0.404635	0.403269	-0.331908	1	80	43
476	7353	Tha-1	CS76611	NED	52.08	4.3	Maarten Koornneef	Salk	0.623625	0.519608	0.309475	0.511618	0.518198	3	86	85
477	7354	Ting-1	CS76612	SWE	56.5	14.9	Maarten Koornneef	Salk	0.4073	0.180653	0.171466	0.271156	0.0521925	-41	100.25	85
478	7356	Tol-0	CS76614	USA	41.6639	-83.5553	Scott Leisner	Salk,MPI	0.380819	0.536748	0.421157	0.521939	0.242522	-87	88	53
479	7358	Tol-2	CS79019	USA	41.6639	-83.5553	Scott Leisner	MPI	0.380819	0.536748	0.421157	0.521939	0.242522	-87	NA	71
480	7359	Tol-3	CS79020	USA	41.6639	-83.5553	Scott Leisner	MPI	0.380819	0.536748	0.421157	0.521939	0.242522	-87	NA	72
481	7372	Tscha-1	CS76616	AUT	47.0748	9.9042	Maarten Koornneef	Salk	0.601484	0.623612	0.199095	0.289056	1.14175	-70	83	49
482	7373	Tsu-0	CS77389	JPN	34.43	136.31	Albert Kranz	Mott	0.161996	0.194364	0.2198	0.255684	-0.122982	-10	81.25	43
483	7377	Tul-0	CS76618	USA	43.2708	-85.2563	Albert Kranz	Salk	0.290655	0.200946	0.222611	0.311686	-0.102388	-107	75.75	56
484	7378	Uk-1	CS76620	GER	48.0333	7.7667	Albert Kranz	Salk	0.566074	0.242081	0.354312	0.251178	-0.380905	-10	71.25	33
485	7382	Utrecht	CS76622	NED	52.0918	5.1145	Viola Willemsen	Salk	0.330938	0.170849	0.262786	0.291248	-0.430562	-5	55.5	28
486	7383	Van-0	CS76623	CAN	49.2655	-123.206	Albert Kranz	Salk	0.430622	0.585146	0.379039	0.513244	0.434223	0	60.5	53
487	7384	Ven-1	CS76624	NED	52.0333	5.55	Maarten Koornneef	Salk	0.50533	0.119224	0.300905	0.298576	-0.925791	-7	76.25	70
488	7387	Vind-1	CS76625	UK	54.9902	-2.3671	Maarten Koornneef	Salk	0.372078	0.124914	0.0597148	0.167303	0.738048	-8	60.75	53
489	7394	Wa-1	CS76626	POL	52.3	21	Albert Kranz	Salk	0.405312	0.320444	0.2669	0.385628	0.182835	-61	56.75	49
490	7396	Ws-0.2	CS78857	RUS	52.3	30	Albert Kranz	Mott	0.441378	0.289113	0.0643082	0.230614	1.50313	-101	61.5	58
491	7404	Wc-1	CS76627	GER	52.6	10.0667	Albert Kranz	Salk	0.392671	0.168655	0.15892	0.233935	0.0594566	-22	68.5	48
492	7411	Wl-0	CS76630	GER	47.9299	10.8134	Albert Kranz	Salk	0.348549	0.277458	0.283765	0.220237	-0.0224783	-46	66	38
493	7413	Wil-2	CS78856	LTU	54.6833	25.3167	Albert Kranz	Mott	0.233859	0.270602	0.172357	0.311671	0.451081	-89	69.25	69
494	7415	Wu-0	CS78858	GER	49.7878	9.9361	Albert Kranz	Mott	0.502695	0.442068	0.347525	0.202989	0.240626	-27	72.25	48
495	7416	Yo-0	CS76633	USA	37.45	-119.35	Albert Kranz	Salk	0.198401	0.0996161	0.191211	0.364847	-0.652053	-43	81.5	64
496	7417	Zu-0	CS78880	SUI	47.3667	8.55	Albert Kranz	Mott	0.584666	0.237762	0.28116	0.274902	-0.167653	-24	86.33	43
497	7418	Zu-1	CS78881	SUI	47.3667	8.55	Albert Kranz	Monsanto	0.584666	0.237762	0.28116	0.274902	-0.167653	-24	63.5	41
498	7419	Db-1	CS76471	GER	50.3058	8.32213	Albert Kranz	Salk	0.3454	0.200466	0.221788	0.228752	-0.101076	-29	69	40
499	7424	Jl-3	CS76519	CZE	49.2	16.6166	Albert Kranz	Salk	0.5948	0.440834	0.34396	0.406131	0.248142	-49	57.75	47
500	7427	Ko-2	CS76531	DEN	NA	NA	Albert Kranz	Salk	NA	NA	NA	NA	NA	NA	101	54
501	7430	Nc-1	CS76559	FRA	48.6167	6.25	Albert Kranz	Salk	0.320778	0.173797	0.383656	0.325996	-0.791858	-18	72.5	43
502	7460	Da(1)-12	CS76470	CZE	NA	NA	Igor Vizir	Salk	NA	NA	NA	NA	NA	NA	75	48
503	7461	H55	CS76897	CZE	49	15	Igor Vizir	Salk	0.339478	0.111271	0.249486	0.392366	-0.807433	-58	68	21
504	7471	RLD-1	CS76588	UNK	NA	NA	Maarten Koornneef	Salk	NA	NA	NA	NA	NA	NA	56.25	57
505	7475	KEN	CS79021	USA	41.767	-72.677	Massimo Pigliucci	MPI	0.18495	0.194844	0.363362	0.292108	-0.623199	-83	NA	68
506	7477	WAR	CS78853	USA	41.7302	-71.2825	Massimo Pigliucci	Monsanto	NA	NA	NA	NA	NA	-69	74	43
507	7514	RRS-7	CS76593	USA	41.5609	-86.4251	Joy Bergelson	Salk	0.326632	0.363979	0.348211	0.223367	0.0442891	-92	80.25	57
508	7515	RRS-10	CS76592	USA	41.5609	-86.4251	Joy Bergelson	MPI,Salk	0.326632	0.363979	0.348211	0.223367	0.0442891	-92	73.75	57
509	7516	V√•r2-1	CS78830	SWE	55.58	14.334	Magnus Nordborg	GMI	0.630866	0.764774	0.636021	0.634422	0.18435	-20	105	112
510	7517	V√•r2-6	CS78831	SWE	55.58	14.334	Magnus Nordborg	GMI	0.630866	0.764774	0.636021	0.634422	0.18435	-20	115	76
511	7520	Lp2-2	CS76546	CZE	49.38	16.81	Ivo Cetl	Salk	0.401558	0.324489	0.14082	0.336162	0.83477	-63	73.25	78
512	7521	Lp2-6	CS77052	CZE	49.38	16.81	Ivo Cetl	Salk	0.401558	0.324489	0.14082	0.336162	0.83477	-63	70.75	59
513	7523	Pna-17	CS76575	USA	42.0945	-86.3253	Joy Bergelson	Salk	0.30327	0.199026	0.231523	0.361609	-0.151243	-86	80	45
514	7525	Rmx-A180	CS77218	USA	42.036	-86.511	Joy Bergelson	Salk	0.375994	0.268477	0.234609	0.219504	0.134846	-84	63	54
515	7529	627RMX-1MN4	CS79022	USA	42.0333	-86.5128	Justin Borevitz	MPI	0.375994	0.268477	0.234609	0.219504	0.134846	-84	NA	63
516	7530	627RMX-1MN5	CS79023	USA	42.0333	-86.5128	Justin Borevitz	MPI	0.375994	0.268477	0.234609	0.219504	0.134846	-84	NA	61
517	7566	627ME-13Y1	CS78367	USA	42.093	-86.359	Justin Borevitz	MPI	0.30327	0.199026	0.231523	0.361609	-0.151243	-85	NA	74
518	7568	627ME-1MI1	CS79024	USA	42.093	-86.359	Justin Borevitz	MPI	0.30327	0.199026	0.231523	0.361609	-0.151243	-85	NA	70
519	7717	KNO1.37	CS76972	USA	41.273	-86.625	Megan Dunning	Monsanto	0.34204	0.268271	0.215549	0.379918	0.218808	-97	82.75	47
520	7757	KNO2.41	CS79025	USA	41.273	-86.625	Megan Dunning	MPI	0.34204	0.268271	0.215549	0.379918	0.218808	-97	NA	71
521	7767	KNO2.54	CS79026	USA	41.273	-86.625	Megan Dunning	MPI	0.34204	0.268271	0.215549	0.379918	0.218808	-97	NA	67
522	7917	PNA3.10	CS77183	USA	42.0945	-86.3253	Megan Dunning	Monsanto	0.30327	0.199026	0.231523	0.361609	-0.151243	-86	82.25	39
523	7947	PNA3.40	CS77184	USA	42.0945	-86.3253	Megan Dunning	Monsanto	0.30327	0.199026	0.231523	0.361609	-0.151243	-86	82.25	46
524	8037	PT1.52	CS79027	USA	41.3423	-86.7368	Megan Dunning	MPI	0.427156	0.414644	0.329288	0.296382	0.230487	-96	NA	74
525	8057	PT1.85	CS79028	USA	41.3423	-86.7368	Megan Dunning	MPI	0.427156	0.414644	0.329288	0.296382	0.230487	-96	NA	71
526	8077	PT2.21	CS77191	USA	41.3423	-86.7368	Megan Dunning	Monsanto	0.427156	0.414644	0.329288	0.296382	0.230487	-96	70	39
527	8132	RMX3.22	CS77219	USA	42.036	-86.511	Megan Dunning	Monsanto	0.375994	0.268477	0.234609	0.219504	0.134846	-84	74	42
528	8171	RMX4.118	CS79029	USA	42.036	-86.511	Megan Dunning	MPI	0.375994	0.268477	0.234609	0.219504	0.134846	-84	NA	70
529	8214	Gy-0	CS78901	FRA	49	2	Albert Kranz	Salk	0.401065	0.15508	0.242698	0.241652	-0.447877	4	65	49
530	8222	Lis-2	CS77043	SWE	56.0328	14.775	Magnus Nordborg	GMI	0.41848	0.6223	0.38435	0.508052	0.481869	-25	100	96
531	8227	TH√ñ 03	CS77367	SWE	62.7989	17.9103	Mattias Jakobsson	GMI	0.409089	0.444129	0.196284	0.46586	0.816551	-121	120	121
532	8230	Algutsrum	CS76657	SWE	56.68	16.5	Magnus Nordborg	GMI	0.537339	0.595665	0.0647196	0.215375	2.21962	-34	110.33	110
533	8231	Br√∂1-6	CS76726	SWE	56.3	16	Magnus Nordborg	GMI	NA	NA	NA	NA	NA	-31	100.75	70
534	8233	Dem-4	CS76794	USA	41.1876	-87.1923	Joy Bergelson	Salk	0.57562	0.191485	0.206019	0.327786	-0.0731613	-101	75.5	34
535	8234	Gul1-2	CS76896	SWE	56.4606	15.8127	Magnus Nordborg	GMI,Salk	0.506329	0.118538	0.170095	0.124865	-0.361118	-36	102.67	72
536	8235	Hod	CS76924	CZE	48.8	17.1	Jirina Relichov	Salk	0.422284	0.199232	0.283628	0.245268	-0.353193	-46	74.5	33
537	8236	HSm	CS76941	CZE	49.33	15.76	Jirina Relichov	Salk	0.377031	0.227273	0.268065	0.377221	-0.16508	-58	74	27
538	8237	K√§vlinge-1	CS76964	SWE	55.8	13.1	Torbjorn Sall	GMI	0.435795	0.150418	0.171877	0.269419	-0.13336	-29	97.25	99
539	8238	Kent	CS76967	UK	51.15	0.4	Magnus Nordborg	Salk	0.327921	0.131085	0.203826	0.225561	-0.441422	8	79.5	50
540	8239	PHW-3	CS76976	GER	51	7	Paul Williams	Salk	0.495222	0.277252	0.343137	0.496633	-0.213203	-8	56	23
541	8240	Kulturen-1	CS76987	SWE	55.705	13.196	Torbjorn Sall	GMI	0.449562	0.330934	0.273207	0.219032	0.191688	-27	94.5	84
542	8241	Liarum	CS77038	SWE	55.9473	13.821	Torbjorn Sall	GMI	0.436223	0.322295	0.213081	0.215492	0.413796	-35	90.75	94
543	8242	Lill√∂-1	CS77039	SWE	56.1494	15.7884	Magnus Nordborg	GMI	NA	NA	NA	NA	NA	-28	116.75	85
544	8243	PHW-2	CS77173	ITA	43.7703	11.2547	Paul Williams	Salk	0.230114	0.353078	0.435692	0.353546	-0.210245	19	80	38
545	8244	PHW-34	CS77174	FRA	48.6103	2.3086	Paul Williams	Salk	0.407548	0.135952	0.35205	0.220971	-0.951469	5	90.5	70
546	8246	NC-6	CS77124	USA	35	-79.18	Joy Bergelson	Salk	0.207451	0.307075	0.199095	0.121735	0.433311	-9	70.5	58
547	8247	San-2	CS77233	SWE	56.07	13.74	Magnus Nordborg	GMI	0.387735	0.194227	0.110037	0.267084	0.568212	-33	98	102
548	8249	Vimmerby	CS78845	SWE	57.7	15.8	Magnus Nordborg	GMI	0.567038	0.300969	0.121966	0.199922	0.903264	-52	93.75	94
549	8256	B√•1-2	CS76676	SWE	56.4	12.9	Magnus Nordborg	GMI	0.232286	0.159674	0.0480598	0.273944	1.20069	-51	73.25	74
550	8258	B√•4-1	CS76677	SWE	56.4	12.9	Magnus Nordborg	GMI	0.232286	0.159674	0.0480598	0.273944	1.20069	-51	93	96
551	8259	B√•5-1	CS76678	SWE	56.4	12.9	Magnus Nordborg	GMI	0.232286	0.159674	0.0480598	0.273944	1.20069	-51	88	106
552	8264	Bla-1	CS76451	ESP	41.6833	2.8	Albert Kranz	Salk	0.585542	0.576708	0.647846	0.542623	-0.116317	54	65.5	46
553	8283	Dra3-1	CS76811	SWE	55.76	14.12	Magnus Nordborg	GMI	0.583063	0.819827	0.591458	0.710687	0.326504	-28	84.25	96
554	8284	DraII-1	CS76813	CZE	49.4112	16.2815	Jirina Relichov	Salk	0.423193	0.245167	0.195393	0.392259	0.226926	-58	83.25	32
555	8285	DraIII-1	CS76815	CZE	49.4112	16.2815	Jirina Relichov	Salk	0.423193	0.245167	0.195393	0.392259	0.226926	-58	66.5	50
556	8290	En-1	CS76841	GER	50	8.5	Albert Kranz	Salk	0.413993	0.191828	0.240985	0.160467	-0.228135	-22	63.25	41
557	8297	Ge-0	CS76875	SUI	46.5	6.08	Albert Kranz	Salk	0.608503	0.156451	0.241396	0.252843	-0.433693	-55	85.75	59
558	8306	Hov4-1	CS76936	SWE	56.1	13.74	Magnus Nordborg	GMI	0.387735	0.194227	0.110037	0.267084	0.568212	-33	102.5	85
559	8307	Hovdala-6	CS76938	SWE	56.1	13.74	Torbjorn Sall	GMI	0.387735	0.194227	0.110037	0.267084	0.568212	-33	79.25	72
560	8311	In-0	CS78903	AUT	47.5	11.5	Albert Kranz	Salk	0.398199	0.588304	0.484437	0.242338	0.194256	-87	65.5	35
561	8312	Is-0	CS78904	GER	50.5	7.5	Albert Kranz	MPI,Salk	0.518121	0.251954	0.183464	0.313678	0.31723	-17	65.75	46
562	8326	Lis-1	CS77042	SWE	56.0328	14.775	Magnus Nordborg	GMI	0.41848	0.6223	0.38435	0.508052	0.481869	-25	86.75	77
563	8334	Lu-1	CS77056	SWE	55.71	13.2	Albert Kranz	GMI	0.449562	0.330934	0.273207	0.219032	0.191688	-29	74.75	69
564	8335	Lund	CS77060	SWE	55.71	13.2	Magnus Nordborg	GMI	0.449562	0.330934	0.273207	0.219032	0.191688	-29	100	119
565	8337	Mir-0	CS76551	ITA	44	12.37	Albert Kranz	Salk	0.250767	0.236048	0.230975	0.318675	0.0217272	0	74	47
566	8343	Na-1	CS76558	FRA	47.5	1.5	Albert Kranz	Salk	0.42057	0.162622	0.226656	0.257969	-0.332006	3	81.25	51
567	8351	Ost-0	CS77154	SWE	60.25	18.37	Albert Kranz	GMI	0.533273	0.389423	0.207459	0.194229	0.629732	-75	103	96
568	8354	Per-1	CS76571	RUS	58	56.3167	Albert Kranz	Salk	0.481631	0.328449	0.224599	0.455164	0.380064	-186	82	64
569	8357	Pla-0	CS76573	ESP	41.5	2.25	Albert Kranz	Salk	0.317813	0.34204	0.240573	0.261695	0.351904	58	71.75	68
570	8365	Rak-2	CS77201	CZE	49	16	Albert Kranz	Salk	0.490453	0.247909	0.318113	0.38943	-0.249346	-49	74	38
571	8366	Rd-0	CS76584	GER	50.5	8.5	Albert Kranz	Salk	0.447865	0.187509	0.297546	0.239143	-0.461743	-28	78.33	52
572	8369	Rev-1	CS77214	SWE	55.6942	13.4504	Magnus Nordborg	GMI	0.397157	0.159811	0.156109	0.18869	0.0234386	-27	98	129
573	8376	Sanna-2	CS77234	SWE	62.69	18	Magnus Nordborg	GMI	0.44167	0.504735	0.304744	0.590735	0.50456	-123	103	140
574	8386	Sr:5	CS77268	SWE	58.9	11.2	Ivo Cetl	GMI	0.459597	0.365093	0.131839	0.287499	1.01857	-41	75	76
575	8387	St-0	CS77270	SWE	59	18	Albert Kranz	GMI	0.50479	0.601314	0.548112	0.574277	0.0926376	-44	74.25	64
576	8419	Wil-1	CS78855	LTU	54.6833	25.3167	Albert Kranz	Salk	0.233859	0.270602	0.172357	0.311671	0.451081	-89	94.25	56
577	8420	Kelsterbach-4	CS76525	GER	50.0667	8.5333	Paul Williams	Salk	0.413993	0.191828	0.240985	0.160467	-0.228135	-21	74.75	50
578	8422	Fj√§1-1	CS76859	SWE	56.06	14.29	Magnus Nordborg	GMI	0.498102	0.257439	0.137186	0.375483	0.629441	-28	116.75	117
579	8424	Kas-2	CS78905	IND	35	77	Shauna Somerville	Salk	0.238242	0.259153	0.117441	0.174038	0.791478	-272	68.25	65
580	8426	Ull1-1	CS78816	SWE	56.06	13.97	Magnus Nordborg	GMI	0.425357	0.359934	0.268271	0.212774	0.293924	-30	62.75	45
581	8427	Ull2-13	CS78552	SWE	56.0648	13.9707	Magnus Nordborg	GMI	0.425357	0.359934	0.268271	0.212774	0.293924	-30	NA	78
582	8464	LP3413.31	CS79030	USA	41.6862	-86.8513	Justin Borevitz	MPI	0.394574	0.274647	0.405252	0.199804	-0.389022	-91	NA	75
583	8483	LP3413.53	CS79031	USA	41.6862	-86.8513	Justin Borevitz	MPI	0.394574	0.274647	0.405252	0.199804	-0.389022	-91	NA	72
584	8699	328PNA062	CS79032	USA	42.0945	-86.3253	Justin Borevitz	MPI	0.30327	0.199026	0.231523	0.361609	-0.151243	-86	NA	43
585	8723	11PNA1.14	CS79033	USA	42.0945	-86.3253	Justin Borevitz	MPI	0.30327	0.199026	0.231523	0.361609	-0.151243	-86	NA	43
586	9027	RMX413.85	CS79034	USA	42.036	-86.511	Justin Borevitz	MPI	0.375994	0.268477	0.234609	0.219504	0.134846	-84	NA	75
587	9057	Vinsl√∂v	CS78847	SWE	56.1	13.9167	Torbjorn Sall	GMI	0.494404	0.250446	0.175579	0.252851	0.355151	-30	87.5	90
588	9058	V√§stervik	CS78834	SWE	57.75	16.6333	Magnus Nordborg	GMI	0.580988	0.448055	0.188462	0.3741	0.866022	-41	113.25	133
589	9067	Xan-3	CS78860	AZE	38.6536	48.7992	James Beck	Monsanto	0.563374	0.288701	0.417455	0.275769	-0.368784	12	101.75	51
590	9069	Xan-5	CS78861	AZE	38.6536	48.7992	James Beck	Monsanto	0.563374	0.288701	0.417455	0.275769	-0.368784	12	82.75	58
591	9070	Xan-6	CS78862	AZE	38.6536	48.7992	James Beck	Monsanto	0.563374	0.288701	0.417455	0.275769	-0.368784	12	80	46
592	9075	Lerik1-4	CS77023	AZE	38.7406	48.6131	James Beck	Monsanto	0.571794	0.382696	0.338612	0.315273	0.122384	-12	93.25	55
593	9078	Lerik1-7	CS77024	AZE	38.7406	48.6131	James Beck	Monsanto	0.571794	0.382696	0.338612	0.315273	0.122384	-12	100.25	66
594	9079	Lerik2-1	CS77025	AZE	38.7833	48.5517	James Beck	Monsanto	0.571794	0.382696	0.338612	0.315273	0.122384	-15	101	45
595	9081	Lerik2-3	CS77026	AZE	38.7833	48.5517	James Beck	Monsanto	0.571794	0.382696	0.338612	0.315273	0.122384	-15	91.25	45
596	9084	Lerik2-6	CS77028	AZE	38.7833	48.5517	James Beck	Monsanto	0.571794	0.382696	0.338612	0.315273	0.122384	-15	103.75	60
597	9085	Lerik2-7	CS77029	AZE	38.7833	48.5517	James Beck	Monsanto	0.571794	0.382696	0.338612	0.315273	0.122384	-15	103	55
598	9089	Nar-3	CS77119	AZE	38.9522	48.925	James Beck	Monsanto	NA	NA	NA	NA	NA	9	88.67	64
599	9091	Nar-5	CS77121	AZE	38.9522	48.925	James Beck	Monsanto	NA	NA	NA	NA	NA	9	99.75	44
600	9095	Istisu-5	CS76950	AZE	38.9786	48.5594	James Beck	Monsanto	0.514594	0.496229	0.384821	0.239866	0.25426	-5	104	57
601	9099	Istisu-9	CS76953	AZE	38.9786	48.5594	James Beck	Monsanto	0.514594	0.496229	0.384821	0.239866	0.25426	-5	100.25	51
602	9100	Lag1-2	CS76998	GEO	41.8296	46.2831	James Beck	Monsanto	0.384251	0.22501	0.225147	0.236812	-0.000609199	-24	77.5	52
603	9102	Lag1-4	CS76999	GEO	41.8296	46.2831	James Beck	Monsanto	0.384251	0.22501	0.225147	0.236812	-0.000609199	-24	83.75	60
604	9103	Lag1-5	CS77000	GEO	41.8296	46.2831	James Beck	Monsanto	0.384251	0.22501	0.225147	0.236812	-0.000609199	-24	83.25	62
605	9104	Lag1-6	CS77001	GEO	41.8296	46.2831	James Beck	Monsanto	0.384251	0.22501	0.225147	0.236812	-0.000609199	-24	60.75	68
606	9105	Lag1-7	CS77002	GEO	41.8296	46.2831	James Beck	Monsanto	0.384251	0.22501	0.225147	0.236812	-0.000609199	-24	77.25	39
607	9106	Lag1-8	CS77003	GEO	41.8296	46.2831	James Beck	Monsanto	0.384251	0.22501	0.225147	0.236812	-0.000609199	-24	87.25	47
608	9111	Lag2-4	CS77005	GEO	41.8296	46.2831	James Beck	Monsanto	0.384251	0.22501	0.225147	0.236812	-0.000609199	-24	100.5	79
609	9113	Lag2-6	CS77006	GEO	41.8296	46.2831	James Beck	Monsanto	0.384251	0.22501	0.225147	0.236812	-0.000609199	-24	76	42
610	9114	Lag2-7	CS77007	GEO	41.8296	46.2831	James Beck	Monsanto	0.384251	0.22501	0.225147	0.236812	-0.000609199	-24	99.75	58
611	9115	Lag2-10	CS77004	GEO	41.8296	46.2831	James Beck	Monsanto	0.384251	0.22501	0.225147	0.236812	-0.000609199	-24	91.25	45
612	9121	Bak-5	CS76685	GEO	41.7942	43.4767	James Beck	Monsanto	0.46971	0.279583	0.137049	0.225892	0.71296	-97	105.25	51
613	9125	Geg-14	CS76876	ARM	40.1408	44.8203	James Beck	Monsanto	0.532326	0.372686	0.175854	0.446875	0.751085	-105	74	65
614	9128	Yeg-2	CS78864	ARM	39.8692	45.3622	James Beck	Monsanto	0.536349	0.436172	0.135335	0.397142	1.17028	-100	69.5	54
615	9130	Yeg-4	CS78865	ARM	39.8692	45.3622	James Beck	Monsanto	0.536349	0.436172	0.135335	0.397142	1.17028	-100	72.75	46
616	9131	Yeg-5	CS78866	ARM	39.8692	45.3622	James Beck	Monsanto	0.536349	0.436172	0.135335	0.397142	1.17028	-100	72.5	65
617	9133	Yeg-7	CS78867	ARM	39.8692	45.3622	James Beck	Monsanto	0.536349	0.436172	0.135335	0.397142	1.17028	-100	73.25	58
618	9134	Yeg-8	CS78868	ARM	39.8692	45.3622	James Beck	Monsanto	0.536349	0.436172	0.135335	0.397142	1.17028	-100	79.75	66
619	9298	Edi-1	CS76832	UK	55.9681	-3.21833	James Beck	Monsanto	0.494065	0.377005	0.374194	0.367936	0.00748384	1	60	37
620	9312	Ullapool-8	CS78821	UK	57.9	-5.1525	James Beck	Monsanto	0.445916	0.363983	0.11511	0.422728	1.15122	1	75.25	44
621	9314	Gol-2	CS76883	UK	57.9672	-3.96722	James Beck	Monsanto	NA	NA	NA	NA	NA	-7	74.25	60
622	9321	√Ödal 1	CS76643	SWE	62.8622	18.336	Alison Anastasio	GMI	0.392236	0.56403	0.462361	0.733175	0.198761	-126	106.75	167
623	9323	√Ödal 3	CS76644	SWE	62.8622	18.336	Alison Anastasio	GMI	0.392236	0.56403	0.462361	0.733175	0.198761	-126	97	148
624	9332	Bar 1	CS76688	SWE	62.8698	18.381	Alison Anastasio	GMI	0.392236	0.56403	0.462361	0.733175	0.198761	-124	114.25	102
625	9336	B√∂n 1	CS76715	SWE	62.8794	18.4473	Alison Anastasio	GMI	NA	NA	NA	NA	NA	-126	84	113
626	9339	B√∂t 1	CS76720	SWE	57.7133	15.0689	Alison Anastasio	GMI	0.369425	0.321661	0.0900864	0.261111	1.27273	-66	104.5	85
627	9343	Dju-1	CS78896	SWE	57.3089	18.1512	Alison Anastasio	GMI	0.645233	0.239879	0.122172	0.115671	0.674705	-30	94.5	122
628	9352	D√∂d 2	CS76797	SWE	57.2608	16.3675	Alison Anastasio	GMI	0.445376	0.392444	0.149321	0.104427	0.966294	-40	127.75	107
629	9353	D√∂d 3	CS76798	SWE	57.2608	16.3675	Alison Anastasio	GMI	0.445376	0.392444	0.149321	0.104427	0.966294	-40	126	93
630	9363	EdJ 2	CS76833	SWE	62.9147	18.4045	Alison Anastasio	GMI	0.392236	0.56403	0.462361	0.733175	0.198761	-128	134	130
631	9369	EkS 2	CS76837	SWE	57.6781	14.9986	Alison Anastasio	GMI	0.369425	0.321661	0.0900864	0.261111	1.27273	-62	81.75	89
632	9370	EkS 3	CS79035	SWE	57.6781	14.9986	Alison Anastasio	GMI	0.369425	0.321661	0.0900864	0.261111	1.27273	-62	NA	107
633	9371	F√§L 1	CS76852	SWE	63.016	18.3175	Alison Anastasio	GMI	0.521159	0.34375	0.213012	0.326517	0.478564	-129	129.25	165
634	9380	FlyA 3	CS76865	SWE	55.7488	13.3742	Alison Anastasio	GMI	0.355932	0.369807	0.130399	0.246391	1.04238	-27	101	116
635	9381	Fri 1	CS76868	SWE	55.8106	14.2091	Alison Anastasio	GMI	0.583063	0.819827	0.591458	0.710687	0.326504	-23	98.25	91
636	9382	Fri 2	CS76869	SWE	55.8106	14.2091	Alison Anastasio	GMI	0.583063	0.819827	0.591458	0.710687	0.326504	-23	99	99
637	9383	Fri 3	CS76870	SWE	55.8106	14.2091	Alison Anastasio	GMI	0.583063	0.819827	0.591458	0.710687	0.326504	-23	99.33	80
638	9386	Gr√∂n 12	CS76891	SWE	62.806	18.1896	Alison Anastasio	GMI	0.327529	0.405959	0.176882	0.298952	0.830769	-124	115.5	174
639	9388	Gr√∂n 14	CS76892	SWE	62.806	18.1896	Alison Anastasio	GMI	0.327529	0.405959	0.176882	0.298952	0.830769	-124	127.25	156
640	9390	Hadd-1	CS78659	SWE	57.3263	15.8979	Alison Anastasio	GMI	0.593853	0.231159	0.126628	0.143102	0.601851	-46	79.75	98
641	9391	Hadd-2	CS76905	SWE	57.3263	15.8979	Alison Anastasio	GMI	0.593853	0.231159	0.126628	0.143102	0.601851	-46	85	104
642	9392	Hadd-3	CS76906	SWE	57.3263	15.8979	Alison Anastasio	GMI	0.593853	0.231159	0.126628	0.143102	0.601851	-46	87.25	94
643	9394	Hag-2	CS76907	SWE	56.5804	16.4063	Alison Anastasio	GMI	0.497309	0.47787	0.177668	0.366761	0.989421	-32	110.67	92
644	9395	Hal-1	CS76908	SWE	57.5089	15.0105	Alison Anastasio	GMI	0.289357	0.291367	0.16934	0.301021	0.542671	-61	104.5	78
645	9399	Hamm-1	CS76910	SWE	55.4234	13.9905	Alison Anastasio	GMI	NA	NA	NA	NA	NA	-22	97	76
646	9402	Hel-3	CS76918	SWE	57.8765	14.8549	Alison Anastasio	GMI	0.470284	0.352071	0.107295	0.219904	1.18825	-66	92.25	108
647	9404	HolA-1 1	CS76926	SWE	55.7491	13.399	Alison Anastasio	GMI	0.47789	0.448718	0.219251	0.155817	0.716176	-27	95	125
648	9405	HolA-1 2	CS76927	SWE	55.7491	13.399	Alison Anastasio	GMI	0.47789	0.448718	0.219251	0.155817	0.716176	-27	103.5	128
649	9407	HolA-2 2	CS76928	SWE	55.7491	13.399	Alison Anastasio	GMI	0.47789	0.448718	0.219251	0.155817	0.716176	-27	91.75	115
650	9408	Kal 1	CS76959	SWE	56.047	13.9519	Alison Anastasio	GMI	0.494404	0.250446	0.175579	0.252851	0.355151	-32	108.25	104
651	9409	Kia 1	CS76968	SWE	56.0573	14.302	Alison Anastasio	GMI	0.498102	0.257439	0.137186	0.375483	0.629441	-27	108.25	95
652	9412	Kor 3	CS76981	SWE	57.2746	16.1494	Alison Anastasio	GMI	0.369785	0.202352	0.249966	0.147558	-0.211317	-43	87.25	97
653	9413	Kor 4	CS76982	SWE	57.2746	16.1494	Alison Anastasio	GMI	0.369785	0.202352	0.249966	0.147558	-0.211317	-43	86	98
654	9416	Kru-3	CS76986	SWE	57.7215	18.3837	Alison Anastasio	GMI	0.511741	0.314878	0.0944742	0.265746	1.20386	-32	135.5	118
655	9421	Lan 1	CS77009	SWE	55.9745	14.3997	Alison Anastasio	GMI	0.592263	0.600302	0.642191	0.667963	-0.0674537	-25	107	101
656	9427	N√§s 2	CS77122	SWE	62.8815	18.4055	Alison Anastasio	GMI	0.392236	0.56403	0.462361	0.733175	0.198761	-128	96.75	148
657	9433	Nyl 13	CS77135	SWE	62.9513	18.2763	Alison Anastasio	GMI	0.464058	0.403992	0.0757576	0.444042	1.67386	-126	138	182
658	9436	Puk-1	CS77194	SWE	56.1633	14.6806	Alison Anastasio	GMI	0.425129	0.173934	0.172151	0.199857	0.0103012	-27	89	98
659	9437	Puk-2	CS77195	SWE	56.1633	14.6806	Alison Anastasio	GMI	0.425129	0.173934	0.172151	0.199857	0.0103012	-27	91.75	104
660	9442	Sim-1	CS77250	SWE	55.5678	14.3398	Alison Anastasio	GMI	0.630866	0.764774	0.636021	0.634422	0.18435	-20	104.75	138
661	9450	Spro 1	CS77263	SWE	57.2545	18.2109	Alison Anastasio	GMI	0.645233	0.239879	0.122172	0.115671	0.674705	-30	88	78
662	9451	Spro 2	CS77264	SWE	57.2545	18.2109	Alison Anastasio	GMI	0.645233	0.239879	0.122172	0.115671	0.674705	-30	107.5	92
663	9452	Spro 3	CS77265	SWE	57.2545	18.2109	Alison Anastasio	GMI	0.645233	0.239879	0.122172	0.115671	0.674705	-30	101.5	91
664	9453	Stenk-2	CS77274	SWE	57.8009	18.5162	Alison Anastasio	GMI	0.451735	0.296663	0.0294803	0.0877906	2.30887	-33	106.5	119
665	9454	Stenk-3	CS77275	SWE	57.8009	18.5162	Alison Anastasio	GMI	0.451735	0.296663	0.0294803	0.0877906	2.30887	-33	101.25	112
666	9455	Stenk-4	CS77276	SWE	57.8009	18.5162	Alison Anastasio	GMI	0.451735	0.296663	0.0294803	0.0877906	2.30887	-33	93.25	115
667	9470	Tur-4	CS77399	SWE	57.6511	14.8043	Alison Anastasio	GMI	0.545776	0.352611	0.128342	0.317003	1.01067	-66	102.67	118
668	9471	Ull-A-1	CS78820	SWE	56.0648	13.9707	Alison Anastasio	GMI	0.425357	0.359934	0.268271	0.212774	0.293924	-30	NA	140
669	9476	V√•rA 1	CS78832	SWE	55.5796	14.3336	Alison Anastasio	GMI	0.630866	0.764774	0.636021	0.634422	0.18435	-20	120.25	122
670	9481	Yst-1	CS78869	SWE	55.4242	13.8484	Alison Anastasio	GMI	NA	NA	NA	NA	NA	-23	110.5	95
671	9503	11C1	CS76640	UK	55.8877	-3.21072	Andrew Hudson	Monsanto	0.494065	0.377005	0.374194	0.367936	0.00748384	-8	64	55
672	9506	IP-Alo-0	CS76662	POR	40.11	-7.47	Carlos Alonso-Blanco	Monsanto	0.311159	0.170849	0.569244	0.432021	-1.20353	30	77.75	64
673	9507	IP-Coa-0	CS76775	POR	38.45	-7.5	Carlos Alonso-Blanco	Monsanto	0.245968	0.275401	0.366036	0.343413	-0.284503	58	55	38
674	9508	IP-Mos-1	CS77108	POR	40.04	-7.11	Carlos Alonso-Blanco	Monsanto	0.103618	0.208145	0.206294	0.306819	0.00893306	41	62	59
675	9509	IP-Reg-0	CS77207	POR	39.29	-7.4	Carlos Alonso-Blanco	Monsanto	0.180503	0.143837	0.316125	0.298104	-0.78746	54	64.5	46
676	9510	IP-Rei-0	CS77208	POR	38.75	-7.59	Carlos Alonso-Blanco	Monsanto	0.21288	0.228987	0.412382	0.505218	-0.588286	52	59.25	42
677	9511	IP-Vav-0	CS78835	POR	38.53	-8.02	Carlos Alonso-Blanco	Monsanto	0.253449	0.226793	0.543741	0.548338	-0.874435	65	64.25	48
678	9512	IP-Vid-1	CS78842	POR	38.22	-7.84	Carlos Alonso-Blanco	Monsanto	0.24263	0.256822	0.265803	0.295708	-0.0343731	58	51.25	42
679	9513	IP-Adc-5	CS76646	ESP	38.77	-4.07	Carlos Alonso-Blanco	Monsanto	0.291427	0.321884	0.356369	0.385495	-0.101776	11	71.75	44
680	9514	IP-Adm-0	CS76647	ESP	39.15	-4.54	Carlos Alonso-Blanco	Monsanto	0.201932	0.162142	0.248389	0.334048	-0.426524	8	72.5	30
681	9515	IP-Ala-0	CS76650	ESP	39.72	-6.89	Carlos Alonso-Blanco	Monsanto	0.20434	0.270053	0.20835	0.228082	0.259398	49	56.25	46
682	9517	IP-All-0	CS76659	ESP	42.19	-7.8	Carlos Alonso-Blanco	Monsanto	0.259423	0.192033	0.262992	0.209203	-0.314454	21	64	39
683	9518	IP-Alm-0	CS76660	ESP	39.88	-0.36	Carlos Alonso-Blanco	Monsanto	0.20928	0.323804	0.325723	0.267076	-0.00591093	25	92	58
684	9519	IP-Ang-0	CS78886	ESP	41.94	2.64	Xavier Pic√≥	Monsanto	0.0804967	0.11511	0.397984	0.389544	-1.24052	39	77.25	58
685	9520	IP-Ara-4	CS76670	ESP	41.7	-3.68	Carlos Alonso-Blanco	Monsanto	0.493183	0.271973	0.240436	0.259905	0.123249	-3	113.5	51
686	9521	IP-Bar-1	CS76689	ESP	41.43	2.13	Xavier Pic√≥	Monsanto	0.685062	0.63369	0.472234	0.525584	0.294086	57	69.75	61
687	9522	IP-Bea-0	CS76695	ESP	36.52	-5.27	Carlos Alonso-Blanco	Monsanto	0.206148	0.229398	0.275607	0.255098	-0.183516	63	59	44
688	9523	IP-Ben-0	CS76700	ESP	38.37	-2.66	Carlos Alonso-Blanco	Monsanto	0.374297	0.387015	0.305293	0.245862	0.237192	4	86.75	63
689	9524	IP-Ber-0	CS78887	ESP	42.52	-0.56	Carlos Alonso-Blanco	Monsanto	0.1899	0.18552	0.286508	0.277673	-0.4346	-29	97.25	63
690	9525	IP-Bis-0	CS76711	ESP	42.49	0.54	Xavier Pic√≥	Monsanto	0.395679	0.211093	0.213218	0.192035	-0.0100179	-36	91.75	76
691	9526	IP-Cab-3	CS76738	ESP	41.54	2.39	Xavier Pic√≥	Monsanto	0.609086	0.612848	0.635335	0.613152	-0.036036	58	65	55
692	9527	IP-Cad-0	CS76739	ESP	40.37	-5.74	Carlos Alonso-Blanco	Monsanto	0.104111	0.199164	0.292815	0.351562	-0.385415	-25	86.25	51
693	9528	IP-Cal-0	CS78890	ESP	40.94	-1.37	Carlos Alonso-Blanco	Monsanto	0.24197	0.162553	0.302619	0.248375	-0.62147	-26	105.33	55
694	9529	IP-Cap-1	CS76741	ESP	36.97	-3.36	Carlos Alonso-Blanco	Monsanto	0.140233	0.281023	0.2331	0.385616	0.186968	-30	65	51
695	9530	IP-Car-1	CS76742	ESP	38.25	-4.32	Carlos Alonso-Blanco	Monsanto	0.117746	0.252708	0.257439	0.153733	-0.0185464	17	90.5	42
696	9531	IP-Cdc-3	CS76761	ESP	41.21	-4.54	Carlos Alonso-Blanco	Monsanto	0.366434	0.228712	0.151378	0.162733	0.412685	0	91	63
697	9532	IP-Cdo-0	CS76762	ESP	42.23	-4.64	Carlos Alonso-Blanco	Monsanto	0.371272	0.16413	0.261484	0.31142	-0.465713	-9	106	50
698	9533	IP-Cem-0	CS76763	ESP	41.15	-4.32	Carlos Alonso-Blanco	Monsanto	0.532497	0.304264	0.434663	0.385891	-0.356675	-4	89	60
699	9534	IP-Cmo-3	CS76774	ESP	40.05	-4.65	Carlos Alonso-Blanco	Monsanto	0.297139	0.328397	0.645208	0.389499	-0.675349	22	69.75	59
700	9535	IP-Coc-1	CS76776	ESP	42.31	3.19	Xavier Pic√≥	Monsanto	0.672186	0.641437	0.770396	0.625616	-0.183194	41	93.5	67
701	9536	IP-Cor-0	CS76782	ESP	40.83	-2	Carlos Alonso-Blanco	Monsanto	0.331564	0.132113	0.3273	0.339178	-0.90722	-28	99	65
702	9537	IP-Cum-1	CS76787	ESP	38.07	-6.66	Carlos Alonso-Blanco	Monsanto	0.251547	0.263472	0.294803	0.205647	-0.112362	31	64.25	46
703	9539	IP-Deh-1	CS76793	ESP	40.29	-6.67	Carlos Alonso-Blanco	Monsanto	0.283885	0.219457	0.277801	0.184894	-0.235747	13	78.5	48
704	9540	IP-Elb-0	CS76838	ESP	41.81	2.34	Xavier Pic√≥	Monsanto	0.173364	0.13938	0.167489	0.180304	-0.183714	3	75.25	55
705	9541	IP-Fue-2	CS76871	ESP	38.26	-5.42	Carlos Alonso-Blanco	Monsanto	0.185525	0.221788	0.137803	0.154003	0.475894	22	68.5	50
706	9542	IP-Fun-0	CS76872	ESP	40.79	-4.05	Carlos Alonso-Blanco	Monsanto	0.124323	0.16365	0.190731	0.176631	-0.153133	-31	90	79
707	9543	IP-Gra-0	CS76886	ESP	36.77	-5.39	Xavier Pic√≥	Monsanto	0.252721	0.106266	0.261826	0.286848	-0.901734	15	94.33	65
708	9544	IP-Gua-1	CS76894	ESP	39.4	-5.33	Carlos Alonso-Blanco	Monsanto	0.0847516	0.270465	0.38866	0.310681	-0.362564	16	57.25	46
709	9545	IP-Her-12	CS76920	ESP	39.4	-5.78	Carlos Alonso-Blanco	Monsanto	0.142637	0.19697	0.178185	0.214439	0.10023	23	83.5	55
710	9546	IP-Hom-4	CS76929	ESP	40.82	-1.68	Carlos Alonso-Blanco	Monsanto	0.214906	0.148087	0.319964	0.237329	-0.770408	-34	148.5	58
711	9547	IP-Hor-0	CS76930	ESP	41.67	2.62	Xavier Pic√≥	Monsanto	0.202784	0.286988	0.553476	0.370106	-0.65678	43	79.25	45
712	9548	IP-Hoy-0	CS76939	ESP	40.4	-5	Carlos Alonso-Blanco	Monsanto	0.239528	0.152749	0.34108	0.244734	-0.803321	-25	128	64
713	9549	IP-Hum-2	CS76943	ESP	42.23	-3.69	Carlos Alonso-Blanco	Monsanto	0.426145	0.294598	0.299397	0.236751	-0.0161592	-7	91	56
714	9550	IP-Iso-4	CS76946	ESP	43.05	-5.37	Carlos Alonso-Blanco	Monsanto	0.38294	0.22645	0.126217	0.232481	0.584522	-37	130.25	73
715	9551	IP-Jim-1	CS76955	ESP	42.28	-5.92	Carlos Alonso-Blanco	Monsanto	0.393091	0.318662	0.245647	0.233147	0.260237	-5	102	55
716	9552	IP-Lab-7	CS76995	ESP	40.87	-4.5	Carlos Alonso-Blanco	Monsanto	0.331212	0.312423	0.461264	0.363985	-0.389613	-11	128.75	63
717	9553	IP-Ldd-0	CS77012	ESP	41.58	-4.71	Carlos Alonso-Blanco	Monsanto	0.317586	0.187714	0.391197	0.317488	-0.734291	2	100.75	58
718	9554	IP-Lso-0	CS77055	ESP	38.86	-3.16	Carlos Alonso-Blanco	Monsanto	0.327797	0.464212	0.274304	0.329531	0.526104	6	94	48
719	9555	IP-Mar-1	CS77068	ESP	39.58	-3.93	Carlos Alonso-Blanco	Monsanto	0.21608	0.248732	0.357603	0.385894	-0.363049	-2	93.5	58
720	9556	IP-Men-2	CS77081	ESP	39.66	-4.34	Xavier Pic√≥	Monsanto	0.323409	0.400315	0.50809	0.468627	-0.238406	5	76.25	58
721	9557	IP-Moa-0	CS77102	ESP	42.46	0.7	Carlos Alonso-Blanco	Monsanto	0.153233	0.159194	0.174894	0.147037	-0.0940566	-32	107.25	76
722	9558	IP-Moc-11	CS77103	ESP	41.57	-5.64	Carlos Alonso-Blanco	Monsanto	0.405042	0.384547	0.223159	0.255315	0.54418	1	96.5	62
723	9559	IP-Mon-5	CS77107	ESP	38.06	-4.38	Carlos Alonso-Blanco	Monsanto	0.275928	0.328329	0.313657	0.246318	0.0457149	42	56.75	48
724	9560	IP-Mot-0	CS77109	ESP	38.19	-6.24	Carlos Alonso-Blanco	Monsanto	0.251255	0.245647	0.251954	0.312523	-0.0253527	29	69.25	38
725	9561	IP-Mun-0	CS77114	ESP	40.71	-5.04	Carlos Alonso-Blanco	Monsanto	0.300129	0.129096	0.442136	0.343345	-1.23106	-15	101	38
726	9562	IP-Mur-0	CS77115	ESP	41.67	2	Xavier Pic√≥	Monsanto	0.370192	0.323872	0.227684	0.275677	0.35239	27	93.25	70
727	9564	IP-Nog-17	CS77129	ESP	40.45	-1.6	Xavier Pic√≥	Monsanto	0.195637	0.0763746	0.432607	0.232607	-1.73418	-39	122.25	73
728	9565	IP-Orb-10	CS77152	ESP	42.97	-1.23	Carlos Alonso-Blanco	Monsanto	0.326833	0.204168	0.244755	0.160726	-0.181314	-16	74.5	60
729	9567	IP-Pal-0	CS77159	ESP	42.34	1.3	Xavier Pic√≥	Monsanto	0.255116	0.286508	0.378856	0.173311	-0.279392	-25	113	83
730	9568	IP-Pan-0	CS77160	ESP	42.76	-0.23	Carlos Alonso-Blanco	Monsanto	0.648726	0.468394	0.32161	0.195093	0.375972	-79	103.75	73
731	9569	IP-Pds-1	CS77166	ESP	42.87	-6.45	Carlos Alonso-Blanco	Monsanto	0.462884	0.282943	0.351776	0.242076	-0.21775	-12	99	70
732	9571	IP-Pro-0	CS78914	ESP	43.28	-6.01	Carlos Alonso-Blanco	Monsanto	0.158538	0.0764432	0.136021	0.137455	-0.576261	19	56.5	60
733	9573	IP-Rds-0	CS77206	ESP	41.86	2.99	Xavier Pic√≥	Monsanto	0.176745	0.164678	0.147676	0.227488	0.108975	45	70.25	48
734	9574	IP-Rel-0	CS77209	ESP	38.6	-2.7	Carlos Alonso-Blanco	Monsanto	0.223408	0.30351	0.194433	0.30218	0.445328	4	112	51
735	9576	IP-Rev-0	CS77213	ESP	40.86	-4.11	Carlos Alonso-Blanco	Monsanto	0.124323	0.16365	0.190731	0.176631	-0.153133	-18	106	65
736	9577	IP-Ria-0	CS77216	ESP	42.34	2.17	Xavier Pic√≥	Monsanto	0.145362	0.423763	0.258124	0.18257	0.495732	-23	99.5	77
737	9578	IP-Sac-0	CS77229	ESP	42.13	-6.7	Carlos Alonso-Blanco	Monsanto	0.237946	0.129508	0.122035	0.126264	0.0594342	-24	75.25	58
738	9579	IP-San-10	CS77232	ESP	38.33	-3.51	Carlos Alonso-Blanco	Monsanto	0.308841	0.272933	0.252022	0.164661	0.0797078	23	77	47
739	9581	IP-Sdv-3	CS77242	ESP	42.84	-5.12	Carlos Alonso-Blanco	Monsanto	0.221415	0.0741807	0.151104	0.246532	-0.711463	-22	111	61
740	9582	IP-Ses-0	CS77244	ESP	41.48	-1.63	Carlos Alonso-Blanco	Monsanto	0.421894	0.253119	0.465652	0.573446	-0.609577	-23	95.75	68
741	9583	IP-Sne-0	CS77258	ESP	37.09	-3.38	Carlos Alonso-Blanco	Monsanto	0.627939	0.36206	0.409022	0.543212	-0.121961	-50	96.75	64
742	9584	IP-Stp-0	CS77283	ESP	41.19	-3.58	Carlos Alonso-Blanco	Monsanto	0.236875	0.118333	0.130536	0.241321	-0.0981503	-21	88.5	45
743	9585	IP-Svi-0	CS77287	ESP	43.4	-7.39	Carlos Alonso-Blanco	Monsanto	0.296624	0.0461401	0.0780886	0.162927	-0.526161	31	52.25	65
744	9586	IP-Tam-0	CS77340	ESP	41.03	-3.27	Carlos Alonso-Blanco	Monsanto	0.328573	0.300905	0.383724	0.24806	-0.243129	-11	97.5	56
745	9587	IP-Tdc-0	CS77344	ESP	41.5	-1.88	Carlos Alonso-Blanco	Monsanto	0.417245	0.227273	0.457768	0.256847	-0.700211	-19	101	69
746	9588	IP-Tol-7	CS77371	ESP	42.11	0.6	Xavier Pic√≥	Monsanto	0.266621	0.268819	0.31496	0.273289	-0.158404	-16	85	66
747	9589	IP-Tor-1	CS77378	ESP	41.6	-2.83	Carlos Alonso-Blanco	Monsanto	0.333226	0.13369	0.254628	0.31064	-0.64428	-14	85.75	47
748	9590	IP-Trs-0	CS77387	ESP	43.37	-5.49	Carlos Alonso-Blanco	Monsanto	0.137473	0.12512	0.0598519	0.278757	0.7374	38	51.25	50
749	9591	IP-Vad-0	CS78826	ESP	42.86	-3.59	Carlos Alonso-Blanco	Monsanto	0.345524	0.10894	0.213355	0.349554	-0.672161	10	67	33
750	9592	IP-Vae-2	CS78827	ESP	42.1	-5.44	Carlos Alonso-Blanco	Monsanto	0.394861	0.224188	0.288016	0.314668	-0.250533	-3	95	62
751	9593	IP-Vaz-0	CS78836	ESP	42.26	-2.99	Carlos Alonso-Blanco	Monsanto	0.383283	0.143425	0.232072	0.25471	-0.481233	-35	109.5	94
752	9594	IP-Vdm-0	CS78837	ESP	42.04	1.01	Carlos Alonso-Blanco	Monsanto	0.387572	0.347045	0.316468	0.114879	0.0922331	-13	95	76
753	9595	IP-Vdt-0	CS78838	ESP	40.89	-5.5	Carlos Alonso-Blanco	Monsanto	0.358413	0.309543	0.362539	0.517725	-0.158035	0	80.5	47
754	9596	IP-Ver-5	CS78841	ESP	41.95	-7.45	Carlos Alonso-Blanco	Monsanto	0.300207	0.136089	0.185452	0.241664	-0.309483	22	73	48
755	9597	IP-Vig-1	CS78843	ESP	42.31	-2.53	Carlos Alonso-Blanco	Monsanto	0.195646	0.0787056	0.247772	0.41504	-1.14679	-4	69.75	51
756	9598	IP-Vim-0	CS78844	ESP	41.88	-6.51	Carlos Alonso-Blanco	Monsanto	0.291097	0.184972	0.339504	0.232409	-0.607281	-2	87	61
757	9599	IP-Vin-0	CS78846	ESP	42.8	-5.77	Carlos Alonso-Blanco	Monsanto	0.206748	0.211504	0.220143	0.221964	-0.0400308	-24	84.75	57
758	9600	IP-Vis-0	CS78848	ESP	39.85	-6.04	Carlos Alonso-Blanco	Monsanto	0.138043	0.140683	0.229604	0.204997	-0.489847	36	89.5	74
759	9601	IP-Voz-0	CS78849	ESP	41.85	-1.88	Carlos Alonso-Blanco	Monsanto	0.305854	0.136364	0.375977	0.1964	-1.0142	-19	97	55
760	9602	IP-Vpa-1	CS78850	ESP	40.5	-3.96	Carlos Alonso-Blanco	Monsanto	0.22879	0.344508	0.504319	0.192008	-0.381091	13	77.25	60
761	9606	Aitba-1	CS76649	MAR	31.48	-7.45	0	Monsanto	0.275915	0.236734	0.360757	0.351946	-0.421268	-19	63	27
762	9607	Panik-1	CS77161	RUS	53.05	52.15	0	Monsanto	0.259928	0.226176	0.119772	0.198533	0.635719	-173	88.75	37
763	9608	Karag-2	CS76961	RUS	51.37	59.44	0	Monsanto	0.270611	0.293089	0.279377	0.283532	0.0479134	-222	58	28
764	9609	Adam-1	CS76645	RUS	51.41	59.98	0	Monsanto	0.368084	0.313657	0.266146	0.356867	0.164256	-230	74.5	50
765	9610	Lesno-4	CS77034	RUS	53.04	51.96	0	Monsanto	0.560015	0.247292	0.262512	0.325725	-0.0597273	-172	82.25	45
766	9611	Lesno-1	CS77032	RUS	53.04	51.9	0	Monsanto	0.560015	0.247292	0.262512	0.325725	-0.0597273	-171	73.5	52
767	9612	Lesno-2	CS77033	RUS	53.04	51.94	0	Monsanto	0.560015	0.247292	0.262512	0.325725	-0.0597273	-172	86.5	52
768	9613	Balan-1	CS76687	RUS	55.36	61.41	0	Monsanto	0.25692	0.441108	0.271973	0.410717	0.483586	-194	81.75	51
769	9615	Parti-1	CS77163	RUS	52.99	52.16	0	Monsanto	0.38237	0.377691	0.227821	0.214386	0.505515	-173	85.75	43
770	9616	Krazo-1	CS76984	RUS	53.06	51.96	0	Monsanto	0.560015	0.247292	0.262512	0.325725	-0.0597273	-173	93.5	54
771	9617	Karag-1	CS76960	RUS	51.37	59.44	0	Monsanto	0.270611	0.293089	0.279377	0.283532	0.0479134	-222	70.75	41
772	9619	Basta-1	CS76691	RUS	51.84	79.48	0	Monsanto	0.27556	0.129234	0.251817	0.203058	-0.667081	-213	77.33	42
773	9620	Basta-2	CS76692	RUS	51.82	79.48	0	Monsanto	0.27556	0.129234	0.251817	0.203058	-0.667081	-213	89.75	44
774	9621	Basta-3	CS76693	RUS	51.84	79.46	0	Monsanto	0.27556	0.129234	0.251817	0.203058	-0.667081	-213	92	53
775	9622	Bijisk-4	CS76707	RUS	52.52	85.27	0	Monsanto	0.540587	0.567188	0.16317	0.209865	1.2459	-191	92	54
776	9624	Chaba-2	CS76767	RUS	53.6	79.37	0	Monsanto	0.308275	0.276909	0.24071	0.29686	0.140096	-220	79.5	30
777	9625	Kolyv-2	CS76977	RUS	51.31	82.59	0	Monsanto	0.266231	0.183395	0.197792	0.187346	-0.0755755	-202	91.75	61
778	9626	Kolyv-3	CS76978	RUS	51.36	82.59	0	Monsanto	0.266231	0.183395	0.197792	0.187346	-0.0755755	-204	77.33	45
779	9627	Kolyv-5	CS76979	RUS	51.32	82.55	0	Monsanto	0.266231	0.183395	0.197792	0.187346	-0.0755755	-202	90.5	44
780	9628	Kolyv-6	CS76980	RUS	51.33	82.54	0	Monsanto	0.266231	0.183395	0.197792	0.187346	-0.0755755	-201	78.5	27
781	9629	K-oze-1	CS76957	RUS	51.35	82.18	0	Monsanto	0.287733	0.306527	0.151584	0.185362	0.704167	-204	98	44
782	9630	K-oze-3	CS76958	RUS	51.34	82.16	0	Monsanto	0.287733	0.306527	0.151584	0.185362	0.704167	-205	84.75	61
783	9631	Lebja-1	CS77015	RUS	51.65	80.79	0	Monsanto	0.434938	0.460716	0.220417	0.339839	0.737261	-211	98.5	47
784	9632	Lebja-2	CS77016	RUS	51.67	80.82	0	Monsanto	0.434938	0.460716	0.220417	0.339839	0.737261	-212	92	39
785	9633	Lebja-4	CS77017	RUS	51.63	80.83	0	Monsanto	0.434938	0.460716	0.220417	0.339839	0.737261	-213	88.25	32
786	9634	Masl-1	CS77073	RUS	54.13	81.31	0	Monsanto	0.558631	0.39202	0.206705	0.355339	0.640019	-221	91	37
787	9635	Nosov-1	CS77130	RUS	51.87	80.6	0	Monsanto	0.287219	0.359454	0.311874	0.24366	0.141986	-213	93.25	44
788	9636	Noveg-1	CS77131	RUS	51.75	80.82	0	Monsanto	0.604591	0.321884	0.326752	0.323204	-0.0150093	-212	109.75	52
789	9637	Noveg-2	CS77132	RUS	51.77	80.85	0	Monsanto	0.604591	0.321884	0.326752	0.323204	-0.0150093	-212	81.25	47
790	9638	Noveg-3	CS77133	RUS	51.73	80.86	0	Monsanto	0.604591	0.321884	0.326752	0.323204	-0.0150093	-213	88.25	47
791	9639	Panke-1	CS77162	RUS	53.82	80.31	0	Monsanto	0.399463	0.255999	0.351227	0.270874	-0.31626	-221	78	43
792	9640	Rakit-1	CS77202	RUS	51.87	80.06	0	Monsanto	0.551625	0.508433	0.320993	0.501234	0.459914	-212	92.75	41
793	9641	Rakit-2	CS77203	RUS	51.9	80.06	0	Monsanto	0.551625	0.508433	0.320993	0.501234	0.459914	-212	82.67	45
794	9642	Rakit-3	CS77204	RUS	51.84	80.06	0	Monsanto	0.243187	0.278281	0.256342	0.216438	0.0821184	-212	95.5	42
795	9643	Sever-1	CS77245	RUS	52.1	79.31	0	Monsanto	0.509534	0.229398	0.261004	0.488637	-0.129076	-213	85	51
796	9644	Zupan-1	CS78882	CRO	45.07	18.72	0	Monsanto	0.572201	0.261004	0.26402	0.325592	-0.0114914	-32	76.75	48
797	9645	Gradi-1	CS76887	CRO	45.17	18.7	0	Monsanto	0.566845	0.390786	0.477924	0.381842	-0.201293	-33	77.5	44
798	9646	Aiell-1	CS76648	ITA	39.1269	16.1702		Monsanto	0.133081	0.120801	0.187783	0.284715	-0.441143	33	62.5	42
799	9647	Basen-1	CS76690	ITA	40.37	16.77	0	Monsanto	0.371011	0.170575	0.105718	0.339764	0.478399	55	67.75	60
800	9648	Bisig-1	CS76712	ITA	39.48	16.28	0	Monsanto	0.16581	0.183189	0.178116	0.327188	0.0280853	71	60	13
801	9649	Bivio-1	CS76713	ITA	39.13	16.17	0	Monsanto	0.133081	0.120801	0.187783	0.284715	-0.441143	33	76.25	50
802	9651	Filet-1	CS76858	ITA	40.68	14.87	0	Monsanto	0.272453	0.164267	0.284931	0.261905	-0.550752	49	64	32
803	9653	Giffo-1	CS76878	ITA	38.44	16.13	0	Monsanto	0.231802	0.153435	0.367407	0.288844	-0.873195	46	59.5	49
804	9655	Marce-1	CS77071	ITA	38.92	16.47	0	Monsanto	0.27981	0.236254	0.368093	0.277928	-0.443428	58	79	26
805	9656	Marti-1	CS77072	ITA	40.64	17.31	0	Monsanto	0.213955	0.176128	0.336556	0.354543	-0.647554	27	78.25	42
806	9657	Melic-1	CS77078	ITA	38.45	16.04	0	Monsanto	0.164584	0.17887	0.343343	0.249983	-0.65207	77	58.5	43
807	9658	Nicas-1	CS77127	ITA	38.97	16.34	0	Monsanto	0.197488	0.243316	0.297888	0.334238	-0.20236	49	71.33	29
808	9659	Pigna-1	CS77177	ITA	41.18	14.18	0	Monsanto	0.180841	0.298574	0.305224	0.263292	-0.0220288	32	71.25	42
809	9660	Sarno-1	CS77236	ITA	40.84	14.57	0	Monsanto	0.239948	0.278418	0.224805	0.358733	0.213891	49	53.25	44
810	9661	Cimin-1	CS76771	ITA	39.58	16.21	0	Monsanto	0.213805	0.194981	0.74736	0.531459	-1.34364	76	55.25	36
811	9663	Teano-1	CS77357	ITA	41.33	14.09	0	Monsanto	0.0973236	0.183326	0.33683	0.362257	-0.608309	28	69.75	41
812	9664	Mitterberg-1-179	CS78907	ITA	46.366	11.2832	Joerg Wunder	Monsanto	0.254259	0.0995475	0.161525	0.164193	-0.484023	-32	85.5	47
813	9665	Mitterberg-1-180	CS78908	ITA	46.366	11.2832	Joerg Wunder	Monsanto	0.254259	0.0995475	0.161525	0.164193	-0.484023	-32	85.5	51
814	9666	Mitterberg-1-182	CS78909	ITA	46.366	11.2832	Joerg Wunder	Monsanto	0.254259	0.0995475	0.161525	0.164193	-0.484023	-32	86.5	39
815	9667	Mitterberg-1-183	CS78910	ITA	46.366	11.2832	Joerg Wunder	Monsanto	0.254259	0.0995475	0.161525	0.164193	-0.484023	-32	89	33
816	9668	Mitterberg-2-184	CS77085	ITA	46.3668	11.2837	Joerg Wunder	Monsanto	0.254259	0.0995475	0.161525	0.164193	-0.484023	-32	82.5	30
817	9669	Mitterberg-2-185	CS77086	ITA	46.3668	11.2837	Joerg Wunder	Monsanto	0.254259	0.0995475	0.161525	0.164193	-0.484023	-32	81	44
818	9670	Mitterberg-2-186	CS77087	ITA	46.3668	11.2837	Joerg Wunder	Monsanto	0.254259	0.0995475	0.161525	0.164193	-0.484023	-32	105.5	50
819	9671	Mitterberg-3-187	CS77088	ITA	46.3668	11.2837	Joerg Wunder	Monsanto	0.254259	0.0995475	0.161525	0.164193	-0.484023	-32	90.5	48
820	9672	Mitterberg-3-188	CS77089	ITA	46.3668	11.2837	Joerg Wunder	Monsanto	0.254259	0.0995475	0.161525	0.164193	-0.484023	-32	85.33	50
821	9673	Mitterberg-3-189	CS77090	ITA	46.3668	11.2837	Joerg Wunder	Monsanto	0.254259	0.0995475	0.161525	0.164193	-0.484023	-32	87.5	61
822	9676	Mitterberg-4-192	CS77093	ITA	46.3718	11.2866	Joerg Wunder	Monsanto	0.319223	0.18744	0.260661	0.210184	-0.329762	-32	87.75	41
823	9677	Mitterberg-4-193	CS77094	ITA	46.3718	11.2866	Joerg Wunder	Monsanto	0.319223	0.18744	0.260661	0.210184	-0.329762	-32	81.75	59
824	9678	Mitterberg-4-194	CS77095	ITA	46.3718	11.2866	Joerg Wunder	Monsanto	0.319223	0.18744	0.260661	0.210184	-0.329762	-32	69	54
825	9679	Castelfed-1-195	CS76744	ITA	46.3378	11.2928	Joerg Wunder	Monsanto	0.254259	0.0995475	0.161525	0.164193	-0.484023	-44	69.25	46
826	9680	Castelfed-1-196	CS76745	ITA	46.3378	11.2928	Joerg Wunder	Monsanto	0.254259	0.0995475	0.161525	0.164193	-0.484023	-44	62.75	46
827	9681	Castelfed-1-197	CS76746	ITA	46.3378	11.2928	Joerg Wunder	Monsanto	0.254259	0.0995475	0.161525	0.164193	-0.484023	-44	66.25	41
828	9682	Castelfed-1-198	CS76747	ITA	46.3378	11.2928	Joerg Wunder	Monsanto	0.254259	0.0995475	0.161525	0.164193	-0.484023	-44	77.75	50
829	9683	Castelfed-1-199	CS76748	ITA	46.3378	11.2928	Joerg Wunder	Monsanto	0.254259	0.0995475	0.161525	0.164193	-0.484023	-44	64	48
830	9684	Castelfed-2-200	CS76749	ITA	46.3378	11.2928	Joerg Wunder	Monsanto	0.254259	0.0995475	0.161525	0.164193	-0.484023	-44	84	57
831	9685	Castelfed-2-201	CS76750	ITA	46.3378	11.2928	Joerg Wunder	Monsanto	0.254259	0.0995475	0.161525	0.164193	-0.484023	-44	84.75	48
832	9686	Castelfed-2-202	CS76751	ITA	46.3378	11.2928	Joerg Wunder	Monsanto	0.254259	0.0995475	0.161525	0.164193	-0.484023	-44	84.33	57
833	9687	Castelfed-2-203	CS76752	ITA	46.3378	11.2928	Joerg Wunder	Monsanto	0.254259	0.0995475	0.161525	0.164193	-0.484023	-44	88.5	45
834	9689	Castelfed-3-205	CS76754	ITA	46.3378	11.2928	Joerg Wunder	Monsanto	0.254259	0.0995475	0.161525	0.164193	-0.484023	-44	67.75	51
835	9690	Castelfed-3-206	CS76755	ITA	46.3378	11.2928	Joerg Wunder	Monsanto	0.254259	0.0995475	0.161525	0.164193	-0.484023	-44	75.5	44
836	9691	Castelfed-3-207	CS76756	ITA	46.3378	11.2928	Joerg Wunder	Monsanto	0.254259	0.0995475	0.161525	0.164193	-0.484023	-44	74	28
837	9692	Castelfed-3-208	CS76757	ITA	46.3378	11.2928	Joerg Wunder	Monsanto	0.254259	0.0995475	0.161525	0.164193	-0.484023	-44	72	49
838	9693	Castelfed-3-209	CS76758	ITA	46.3378	11.2928	Joerg Wunder	Monsanto	0.254259	0.0995475	0.161525	0.164193	-0.484023	-44	68.5	46
839	9694	Castelfed-4-210	CS78891	ITA	46.3378	11.2928	Joerg Wunder	Monsanto	0.254259	0.0995475	0.161525	0.164193	-0.484023	-44	76.5	61
840	9695	Castelfed-4-211	CS78892	ITA	46.3378	11.2928	Joerg Wunder	Monsanto	0.254259	0.0995475	0.161525	0.164193	-0.484023	-44	103.5	44
841	9696	Castelfed-4-214	CS78893	ITA	46.3378	11.2928	Joerg Wunder	Monsanto	0.254259	0.0995475	0.161525	0.164193	-0.484023	-44	77.5	44
842	9697	Dolen-1	CS76802	BUL	41.62	23.94	0	Monsanto	0.346959	0.270739	0.155971	0.287123	0.551482	-44	77.5	41
843	9698	Goced-1	CS76882	BUL	41.57	23.85	0	Monsanto	0.50566	0.367133	0.481558	0.376308	-0.271302	-26	81	56
844	9699	Kolar-1	CS76974	BUL	41.37	23.14	0	Monsanto	0.292875	0.292815	0.318936	0.24366	-0.0854492	-31	74.25	44
845	9700	Dolna-1-10	CS76803	BUL	42.32	23.1	0	Monsanto	0.385104	0.351913	0.304607	0.362463	0.14436	-41	80	59
846	9701	Ivano-1	CS76954	BUL	43.7	25.91	0	Monsanto	0.501221	0.37584	0.339024	0.423694	0.103093	-50	85.5	57
847	9703	Melni-1	CS77079	BUL	41.53	23.39	0	Monsanto	0.445406	0.215618	0.318456	0.388496	-0.389977	-17	76.5	53
848	9704	Melni-2	CS77080	BUL	41.53	23.39	0	Monsanto	0.445406	0.215618	0.318456	0.388496	-0.389977	-17	75.5	40
849	9705	Choto-1	CS76769	BUL	41.5	23.33	0	Monsanto	0.445406	0.215618	0.318456	0.388496	-0.389977	-3	71.33	45
850	9706	Dospa-1	CS76807	BUL	41.64	24.18	0	Monsanto	0.418513	0.129371	0.0938571	0.301146	0.320908	-62	95.25	43
851	9707	Podvi-1	CS77187	BUL	41.57	24.84	0	Monsanto	0.39091	0.189908	0.132799	0.246653	0.357707	-42	80.5	47
852	9708	Kardz-1	CS76962	BUL	41.62	25.35	0	Monsanto	0.495342	0.455642	0.276909	0.262555	0.498018	-22	89	62
853	9709	Zerev-1-34	CS78878	BUL	41.85	23.13	0	Monsanto	0.306424	0.166187	0.364665	0.261307	-0.785866	-23	82	43
854	9710	Zerev-1-35	CS78879	BUL	41.85	23.13	0	Monsanto	0.306424	0.166187	0.364665	0.261307	-0.785866	-23	80.5	40
855	9711	Dolna-1-39	CS76804	BUL	42.32	23.1	0	Monsanto	0.385104	0.351913	0.304607	0.362463	0.14436	-41	75	64
856	9712	Dolna-1-40	CS76805	BUL	42.32	23.1	0	Monsanto	0.385104	0.351913	0.304607	0.362463	0.14436	-41	77	39
857	9713	Stara-1	CS77271	BUL	42.49	25.61	0	Monsanto	0.409348	0.326203	0.211573	0.351752	0.432952	-45	75.25	55
858	9714	Grivo-1	CS76888	BUL	41.84	25.75	0	Monsanto	0.594204	0.221788	0.226244	0.429026	-0.0198935	-21	80.75	60
859	9716	Leska-1-44	CS77030	BUL	41.54	24.98	0	Monsanto	0.355358	0.236391	0.18744	0.266216	0.232029	-41	102.67	50
860	9717	Kardz-2	CS76963	BUL	41.66	25.47	0	Monsanto	0.495342	0.455642	0.276909	0.262555	0.498018	-19	90.25	51
861	9718	Smolj-1	CS77256	BUL	41.55	24.75	0	Monsanto	0.416864	0.212807	0.189223	0.323592	0.117461	-47	78.75	39
862	9719	Koren-1	CS76983	BUL	41.83	25.69	0	Monsanto	0.594204	0.221788	0.226244	0.429026	-0.0198935	-19	72.5	37
863	9720	Malak-1	CS77064	BUL	41.77	25.68	0	Monsanto	0.594204	0.221788	0.226244	0.429026	-0.0198935	-21	100.75	61
864	9721	Schip-1	CS77239	BUL	42.72	25.33	0	Monsanto	0.337108	0.308309	0.274784	0.289176	0.115118	-65	77.5	49
865	9722	Groch-1	CS76890	BUL	41.71	24.41	0	Monsanto	0.444673	0.111065	0.167352	0.33804	-0.409982	-48	99.5	47
866	9723	Slavi-2	CS77252	BUL	41.42	23.67	0	Monsanto	0.404832	0.219114	0.127999	0.310341	0.537567	-40	76	38
867	9725	Epidauros-1	CS76844	GRC	37.6	23.08	0	Monsanto	0.359489	0.101879	0.142054	0.404603	-0.332426	42	61.25	29
868	9726	Faneronemi-3	CS76853	GRC	37.07	22.04	0	Monsanto	0.212314	0.121829	0.130056	0.219755	-0.0653471	61	67	37
869	9727	Olympia-2	CS77144	GRC	37.63	21.62	0	Monsanto	0.103477	0.181201	0.226724	0.379818	-0.224127	65	61.25	52
870	9728	Stiav-1	CS77279	SVK	48.46	18.9	0	Monsanto	0.428155	0.304264	0.114768	0.305481	0.974988	-81	77.5	42
871	9729	Stiav-2	CS77280	SVK	48.46	18.9	0	Monsanto	0.428155	0.304264	0.114768	0.305481	0.974988	-81	96.75	68
872	9730	Bela-1	CS76696	SVK	48.47	18.94	0	Monsanto	0.428155	0.304264	0.114768	0.305481	0.974988	-76	89	54
873	9731	Stiav-3	CS77281	SVK	48.46	18.9	0	Monsanto	0.428155	0.304264	0.114768	0.305481	0.974988	-81	92.5	44
874	9732	Halca-1	CS76909	SVK	48.47	18.96	0	Monsanto	0.428155	0.304264	0.114768	0.305481	0.974988	-80	82	57
875	9733	Bela-2	CS76697	SVK	48.47	18.94	0	Monsanto	0.428155	0.304264	0.114768	0.305481	0.974988	-76	80	45
876	9735	Bela-4	CS76699	SVK	48.47	18.94	0	Monsanto	0.428155	0.304264	0.114768	0.305481	0.974988	-76	85.5	46
877	9736	Teiu-2	CS77361	ROU	44.69	25.17	0	Monsanto	0.538329	0.32113	0.242904	0.285252	0.279179	-65	78	35
878	9737	Ulies-1	CS78815	ROU	45.95	22.62	0	Monsanto	0.551762	0.332374	0.194639	0.329657	0.535114	-45	85.75	39
879	9738	Bran-1	CS76722	ROU	45.57	25.42	0	Monsanto	0.492051	0.380296	0.224667	0.354487	0.526329	-86	79	32
880	9739	Toc-1	CS77370	ROU	46.01	22.33	0	Monsanto	0.449215	0.299739	0.11463	0.299252	0.9612	-48	86	42
881	9741	Orast-1	CS77151	ROU	45.84	23.16	0	Monsanto	0.492467	0.352804	0.384958	0.320074	-0.0872219	-52	88	48
882	9743	Furni-1	CS76873	ROU	45.14	25	0	Monsanto	0.352894	0.17318	0.128411	0.239398	0.299096	-79	79.5	44
883	9744	Iasi-1	CS76944	ROU	47.16	27.59	0	Monsanto	0.311553	0.400041	0.161182	0.397877	0.909033	-67	78.75	48
884	9745	Sij 1/96	CS77249	UZB	41.45	70.05	0	Monsanto	0.342345	0.306527	0.366173	0.454498	-0.177801	-165	79.5	49
885	9747	Zabar-1	CS78870	SRB	44.38	21.22	0	Monsanto	0.345258	0.356301	0.179076	0.286	0.687965	-33	86	52
886	9748	Zagub-1	CS78871	SRB	44.23	21.71	0	Monsanto	0.505896	0.309475	0.339161	0.29313	-0.0915977	-38	81	31
887	9749	Knjas-1	CS76971	SRB	43.54	22.29	0	Monsanto	0.365822	0.237694	0.192925	0.295644	0.208683	-39	74.75	38
888	9754	Sredn-1	CS77269	SRB	44.66	21.37	0	Monsanto	0.451619	0.312149	0.284657	0.203134	0.0921962	-31	79.25	59
889	9755	Vajug-1	CS78828	SRB	44.56	22.56	0	Monsanto	0.370762	0.302139	0.316399	0.476868	-0.0461177	-34	88.75	57
890	9756	Staro-2	CS77273	SRB	44.3	21.08	0	Monsanto	0.448791	0.465035	0.389003	0.319998	0.178525	-33	88.75	51
891	9757	Staro-1	CS77272	SRB	44.3	21.08	0	Monsanto	0.448791	0.465035	0.389003	0.319998	0.178525	-33	93.75	44
892	9758	Altai-5	CS76433	CHN	47.75	88.4	0	Salk	0.332241	0.485945	0.302345	0.332052	0.474529	-229	71.25	46
893	9759	Anz-0	CS76439	IRN	37.47	49.47	0	Salk	0.660042	0.657068	0.514192	0.575054	0.245192	37	61.5	48
894	9761	Bik-1	CS76449	LBN	33.92	35.7	0	Salk	0.141428	0.145893	0.268271	0.261227	-0.609122	53	65.25	62
895	9762	Etna-2	CS76487	ITA	37.69	14.98	0	Salk	0.266934	0.174071	0.31969	0.314948	-0.607889	-10	95.5	47
896	9764	Qar-8a	CS76581	LBN	34.1	35.84	0	Salk	0.438803	0.352461	0.449404	0.241127	-0.242981	6	69.75	42
897	9766	Westkar-4	CS76629	KGZ	42.26	74.16	0	Salk	0.285196	0.238654	0.182092	0.370533	0.270498	-189	57.75	50
898	9768	Ru4-16	CS77225	GER	48.57	9.16	0	Monsanto	0.46267	0.274304	0.235843	0.22037	0.151073	-33	74.5	45
899	9769	HE-1	CS76916	GER	48.55	8.99	0	Monsanto	0.230311	0.254902	0.187577	0.247386	0.306689	-34	66.5	53
900	9770	KBG2-13	CS76966	GER	48.53	9.01	0	Monsanto	0.230311	0.254902	0.187577	0.247386	0.306689	-32	67	48
901	9771	Pfn-N2.2-6	CS77172	GER	48.56	9.11	0	Monsanto	0.46267	0.274304	0.235843	0.22037	0.151073	-34	62.5	43
902	9772	Hof-1	CS76925	GER	48.41	8.85	0	Monsanto	0.512529	0.337447	0.196216	0.267076	0.542194	-34	67	45
903	9774	Alt-1	CS76663	GER	48.59	9.22	0	Monsanto	0.29776	0.274647	0.229741	0.263752	0.178534	-31	68	57
904	9775	Berg-1	CS76701	GER	48.41	8.79	0	Monsanto	0.512529	0.337447	0.196216	0.267076	0.542194	-35	60	48
905	9776	Fell3-7	CS76857	GER	48.43	8.79	0	Monsanto	0.512529	0.337447	0.196216	0.267076	0.542194	-34	65.25	63
906	9777	Gn-1	CS76880	GER	48.57	9.17	0	Monsanto	0.46267	0.274304	0.235843	0.22037	0.151073	-32	66.5	59
907	9778	Bach-7	CS76679	GER	48.41	8.84	0	Monsanto	0.512529	0.337447	0.196216	0.267076	0.542194	-34	71.5	50
908	9779	Bai-10	CS76682	GER	48.5	8.78	0	Monsanto	0.517448	0.251268	0.223296	0.228268	0.118022	-35	63.25	44
909	9780	Fell2-4	CS76856	GER	48.43	8.79	0	Monsanto	0.512529	0.337447	0.196216	0.267076	0.542194	-34	72.25	50
910	9781	Kus2-2	CS76990	GER	48.52	9.11	0	Monsanto	0.415917	0.254079	0.209859	0.235527	0.191211	-32	60	48
911	9782	Lu3-30	CS77057	GER	48.53	9.09	0	Monsanto	0.46267	0.274304	0.235843	0.22037	0.151073	-32	63.25	56
912	9783	Tu-PK-7	CS77396	GER	48.52	9.05	0	Monsanto	0.375257	0.307829	0.145002	0.169517	0.752798	-31	76.5	92
913	9784	Erg2-6	CS76845	GER	48.5	8.8	0	Monsanto	0.512529	0.337447	0.196216	0.267076	0.542194	-34	60.25	60
914	9785	Ha-HBT1-2	CS76898	GER	48.54	9.02	0	Monsanto	0.230311	0.254902	0.187577	0.247386	0.306689	-32	63.25	60
915	9786	Ha-P-13	CS76901	GER	48.54	9.01	0	Monsanto	0.230311	0.254902	0.187577	0.247386	0.306689	-32	64.75	46
916	9787	HI-4	CS76922	GER	48.5	9	0	Monsanto	0.375257	0.307829	0.145002	0.169517	0.752798	-32	70.5	52
917	9788	KBG1-14	CS76965	GER	48.53	9.01	0	Monsanto	0.230311	0.254902	0.187577	0.247386	0.306689	-32	62.5	52
918	9789	Obh-13	CS77140	GER	48.39	8.96	0	Monsanto	0.375257	0.307829	0.145002	0.169517	0.752798	-35	65	50
919	9790	Gn2-3	CS76881	GER	48.58	9.18	0	Monsanto	0.46267	0.274304	0.235843	0.22037	0.151073	-32	66.75	62
920	9791	Haes-1	CS76914	GER	48.6	9.2	0	Monsanto	0.46267	0.274304	0.235843	0.22037	0.151073	-33	65.33	36
921	9792	Lu4-2	CS77058	GER	48.54	9.09	0	Monsanto	0.46267	0.274304	0.235843	0.22037	0.151073	-32	62.75	54
922	9793	Ru-N2	CS77224	GER	48.57	9.16	0	Monsanto	0.46267	0.274304	0.235843	0.22037	0.151073	-33	62	43
923	9794	Tu-B1-2	CS77391	GER	48.52	9.08	0	Monsanto	0.415917	0.254079	0.209859	0.235527	0.191211	-31	69.25	64
924	9795	Wank-2	CS78852	GER	48.5	9.11	0	Monsanto	0.415917	0.254079	0.209859	0.235527	0.191211	-33	57.75	37
925	9796	Bach2-1	CS76680	GER	48.41	8.84	0	Monsanto	0.512529	0.337447	0.196216	0.267076	0.542194	-34	73.5	68
926	9797	Ha-HBT2-10	CS76899	GER	48.54	9.02	0	Monsanto	0.230311	0.254902	0.187577	0.247386	0.306689	-32	69	51
927	9798	Ha-P2-1	CS76902	GER	48.54	9.01	0	Monsanto	0.230311	0.254902	0.187577	0.247386	0.306689	-32	65.25	40
928	9799	Hart-2	CS76913	GER	48.39	8.85	0	Monsanto	0.512529	0.337447	0.196216	0.267076	0.542194	-34	66.25	50
929	9800	Ha-S-B	CS76903	GER	48.54	9.01	0	Monsanto	0.230311	0.254902	0.187577	0.247386	0.306689	-32	68.5	43
930	9801	Ha-SP-2	CS76904	GER	48.54	9.01	0	Monsanto	0.230311	0.254902	0.187577	0.247386	0.306689	-32	62	39
931	9802	Kus3-1	CS76991	GER	48.51	9.11	0	Monsanto	0.415917	0.254079	0.209859	0.235527	0.191211	-32	69.75	41
932	9803	Muh-2	CS77113	GER	48.42	8.76	0	Monsanto	0.517448	0.251268	0.223296	0.228268	0.118022	-34	63	63
933	9804	Obe1-15	CS77139	GER	48.45	8.87	0	Monsanto	0.512529	0.337447	0.196216	0.267076	0.542194	-33	65.75	60
934	9805	Pfn-10	CS77171	GER	48.54	9.09	0	Monsanto	0.46267	0.274304	0.235843	0.22037	0.151073	-32	70.5	46
935	9806	Ru-2	CS77223	GER	48.56	9.16	0	Monsanto	0.46267	0.274304	0.235843	0.22037	0.151073	-33	67	53
936	9807	Schl-7	CS77240	GER	48.6	9.22	0	Monsanto	0.29776	0.274647	0.229741	0.263752	0.178534	-31	67.5	38
937	9808	Tu-B2-3	CS77392	GER	48.52	9.08	0	Monsanto	0.415917	0.254079	0.209859	0.235527	0.191211	-31	75.25	50
938	9809	Tu-KB-6	CS77393	GER	48.52	9.05	0	Monsanto	0.375257	0.307829	0.145002	0.169517	0.752798	-31	74.75	64
939	9810	Tu-KS-7	CS77394	GER	48.53	9.07	0	Monsanto	0.230311	0.254902	0.187577	0.247386	0.306689	-31	69.25	33
940	9811	Tu-NK-12	CS77395	GER	48.52	9.05	0	Monsanto	0.375257	0.307829	0.145002	0.169517	0.752798	-31	69.75	45
941	9812	Tu-W1	CS77397	GER	48.52	9.03	0	Monsanto	0.375257	0.307829	0.145002	0.169517	0.752798	-32	67.75	38
942	9813	BI-4	CS76706	GER	48.4	8.77	0	Monsanto	0.517448	0.251268	0.223296	0.228268	0.118022	-35	65.75	34
943	9814	Fell1-10	CS76855	GER	48.42	8.79	0	Monsanto	0.512529	0.337447	0.196216	0.267076	0.542194	-34	71.5	23
944	9815	Ha-HBT3-11	CS76900	GER	48.54	9.02	0	Monsanto	0.230311	0.254902	0.187577	0.247386	0.306689	-32	72.5	45
945	9816	Tu-WH	CS77398	GER	48.55	9.06	0	Monsanto	0.230311	0.254902	0.187577	0.247386	0.306689	-34	63	19
946	9817	IP-Ace-0	CS76642	ESP	39.84	-6.6	Carlos Alonso-Blanco	Monsanto	0.278259	0.316536	0.264089	0.207728	0.181153	43	64.25	34
947	9819	IP-Amu-0	CS76664	ESP	42.35	-3.03	Carlos Alonso-Blanco	Monsanto	0.160304	0.143837	0.145002	0.134048	-0.0080703	-8	98	36
948	9820	IP-Are-0	CS76671	ESP	41	-4.71	Carlos Alonso-Blanco	Monsanto	0.302773	0.31496	0.49479	0.586024	-0.451688	-4	61.75	49
949	9821	IP-Aru-0	CS76674	ESP	41.81	2.49	Xavier Pic√≥	Monsanto	0.214829	0.0968052	0.321267	0.299894	-1.19957	27	79.5	63
950	9822	IP-Aul-0	CS76675	ESP	40.52	-4.02	Carlos Alonso-Blanco	Monsanto	0.22879	0.344508	0.504319	0.192008	-0.381091	4	82	43
951	9823	IP-Bae-0	CS76681	ESP	43.34	-5.84	Carlos Alonso-Blanco	Monsanto	0.229865	0.137186	0.0231729	0.169529	1.77836	38	63	33
952	9824	IP-Bes-5	CS76702	ESP	42.91	-4.91	Carlos Alonso-Blanco	Monsanto	0.364836	0.10421	0.156246	0.214789	-0.405026	-31	115.5	43
953	9825	IP-Boa-0	CS76714	ESP	40.4	-3.88	Carlos Alonso-Blanco	Monsanto	0.37281	0.39675	0.507267	0.413428	-0.245731	13	68.5	55
954	9826	IP-Bor-0	CS76717	ESP	42.49	-6.71	Carlos Alonso-Blanco	Monsanto	0.298668	0.206499	0.320581	0.374259	-0.439839	4	77	45
955	9827	IP-Bos-0	CS76719	ESP	42.78	0.69	Xavier Pic√≥	Monsanto	0.528838	0.295557	0.107775	0.175452	1.00882	-26	69.25	50
956	9828	IP-Bra-0	CS76721	ESP	42.5	-6.15	Xavier Pic√≥	Monsanto	0.399308	0.254559	0.370012	0.356285	-0.374003	-12	82.25	49
957	9830	IP-Bus-0	CS76736	ESP	36.97	-3.28	Carlos Alonso-Blanco	Monsanto	0.163132	0.294803	0.419306	0.542969	-0.352293	-20	61.5	36
958	9831	IP-Cas-0	CS76743	ESP	38.54	-3.39	Carlos Alonso-Blanco	Monsanto	0.5216	0.421226	0.36062	0.282004	0.155345	11	86.25	39
959	9832	IP-Cat-0	CS76759	ESP	40.54	-3.69	Carlos Alonso-Blanco	Monsanto	0.230636	0.180378	0.376251	0.356935	-0.7352	11	97	64
960	9833	IP-Cha-0	CS76764	ESP	40.38	-4.21	Carlos Alonso-Blanco	Monsanto	0.289211	0.307967	0.462635	0.343284	-0.406948	7	75.75	51
961	9834	IP-Cho-0	CS76768	ESP	40.51	-3.9	Carlos Alonso-Blanco	Monsanto	0.22879	0.344508	0.504319	0.192008	-0.381091	10	75	46
962	9835	IP-Cir-0	CS76772	ESP	40.61	-6.57	Carlos Alonso-Blanco	Monsanto	0.202682	0.232003	0.304607	0.263881	-0.272271	18	81.75	51
963	9836	IP-Cod-0	CS76777	ESP	41.25	-1.32	Carlos Alonso-Blanco	Monsanto	0.462743	0.21267	0.179967	0.315804	0.166966	-23	109.5	71
964	9837	IP-Con-0	CS76780	ESP	37.94	-5.6	Xavier Pic√≥	Monsanto	0.137615	0.13842	0.332579	0.216245	-0.876583	17	76.33	66
965	9838	IP-Cot-0	CS76784	ESP	41.83	-5.38	Carlos Alonso-Blanco	Monsanto	0.277903	0.386466	0.391266	0.302503	-0.0123415	-3	73.5	36
966	9839	IP-Coy-0	CS76785	ESP	40.44	-4.27	Carlos Alonso-Blanco	Monsanto	0.289211	0.307967	0.462635	0.343284	-0.406948	-3	102.75	58
967	9840	IP-Dar-0	CS76792	ESP	41.13	-1.43	Carlos Alonso-Blanco	Monsanto	0.408898	0.231112	0.315577	0.376768	-0.311499	-18	100.5	64
968	9841	IP-Ees-0	CS76836	ESP	40.59	-4.15	Carlos Alonso-Blanco	Monsanto	0.170703	0.241533	0.481215	0.218903	-0.689308	-17	77.75	39
969	9843	IP-Elp-0	CS76840	ESP	40.53	-3.92	Carlos Alonso-Blanco	Monsanto	0.22879	0.344508	0.504319	0.192008	-0.381091	13	62.75	53
970	9844	IP-Esn-2	CS76846	ESP	42.27	0.19	Carlos Alonso-Blanco	Monsanto	0.261805	0.244687	0.342177	0.263969	-0.335351	-6	89.25	58
971	9845	IP-Evs-0	CS76848	ESP	40.48	-3.96	Carlos Alonso-Blanco	Monsanto	0.22879	0.344508	0.504319	0.192008	-0.381091	13	77.5	58
972	9846	IP-Ezc-2	CS76849	ESP	42.31	-3.02	Carlos Alonso-Blanco	Monsanto	0.383283	0.143425	0.232072	0.25471	-0.481233	-8	116	55
973	9847	IP-Fel-2	CS76854	ESP	43.31	-5.7	Carlos Alonso-Blanco	Monsanto	0.169915	0.199369	0.114973	0.117279	0.550459	36	60	28
974	9848	IP-Glo-1	CS76879	ESP	40.11	-5.77	Carlos Alonso-Blanco	Monsanto	0.335069	0.177088	0.123817	0.227819	0.357837	13	85.75	42
975	9849	IP-Gud-3	CS76895	ESP	40.65	-4.11	Carlos Alonso-Blanco	Monsanto	0.258613	0.254902	0.464007	0.549817	-0.59902	-6	99	42
976	9850	IP-Hec-0	CS76917	ESP	42.86	-0.7	Carlos Alonso-Blanco	Monsanto	0.652346	0.692171	0.243521	0.248867	1.04463	-48	95.5	60
977	9851	IP-Hue-3	CS76942	ESP	42.96	-6.1	Carlos Alonso-Blanco	Monsanto	0.326242	0.20266	0.112711	0.137899	0.586705	-31	119.5	53
978	9852	IP-Ini-0	CS76945	ESP	40.46	-3.75	Carlos Alonso-Blanco	Monsanto	0.37281	0.39675	0.507267	0.413428	-0.245731	14	76.25	37
979	9853	IP-Lac-0	CS76996	ESP	43.33	-5.91	Carlos Alonso-Blanco	Monsanto	0.158538	0.0764432	0.136021	0.137455	-0.576261	39	56.75	44
980	9854	IP-Laf-1	CS76997	ESP	43.36	-5.88	Carlos Alonso-Blanco	Monsanto	0.101557	0.374469	0.327849	0.339443	0.132956	40	58.75	45
981	9855	IP-Lam-0	CS77008	ESP	40.57	-3.89	Carlos Alonso-Blanco	Monsanto	0.22879	0.344508	0.504319	0.192008	-0.381091	8	73	55
982	9856	IP-Lch-0	CS77010	ESP	40.51	-4	Carlos Alonso-Blanco	Monsanto	0.22879	0.344508	0.504319	0.192008	-0.381091	9	75.25	35
983	9857	IP-Leg-0	CS77019	ESP	40.33	-3.8	Carlos Alonso-Blanco	Monsanto	0.37281	0.39675	0.507267	0.413428	-0.245731	13	65.75	34
984	9858	IP-Loz-0	CS77051	ESP	40.98	-3.8	Carlos Alonso-Blanco	Monsanto	0.105889	0.0689702	0.283834	0.370502	-1.41471	-36	120.75	33
985	9859	IP-Lro-0	CS77054	ESP	40.5	-3.88	Carlos Alonso-Blanco	Monsanto	0.337404	0.212601	0.35918	0.28232	-0.524406	11	76.25	27
986	9860	IP-Lum-0	CS77059	ESP	42.24	-2.62	Carlos Alonso-Blanco	Monsanto	0.193936	0.0785685	0.18744	0.21523	-0.869488	-15	80.75	39
987	9861	IP-Mac-0	CS77061	ESP	40.72	-3.21	Carlos Alonso-Blanco	Monsanto	0.244044	0.234197	0.41677	0.44711	-0.57637	4	107.5	39
988	9862	IP-Mad-0	CS77062	ESP	40.45	-3.67	Carlos Alonso-Blanco	Monsanto	0.389963	0.405046	0.45242	0.343216	-0.110611	12	67.5	17
989	9864	IP-Mat-0	CS77074	ESP	41.76	2.69	Xavier Pic√≥	Monsanto	0.202784	0.286988	0.553476	0.370106	-0.65678	49	63.25	37
990	9866	IP-Mdd-0	CS77076	ESP	41.89	-2.79	Carlos Alonso-Blanco	Monsanto	0.341218	0.181201	0.386741	0.22855	-0.758147	-23	104.75	44
991	9867	IP-Mie-1	CS77083	ESP	40.94	-3.22	Xavier Pic√≥	Monsanto	0.328573	0.300905	0.383724	0.24806	-0.243129	-7	101.75	45
992	9868	IP-Moe-0	CS77104	ESP	41.78	2.37	Xavier Pic√≥	Monsanto	0.173364	0.13938	0.167489	0.180304	-0.183714	15	70.25	54
993	9869	IP-Moj-0	CS77105	ESP	36.76	-5.28	Xavier Pic√≥	Monsanto	0.225126	0.208419	0.388797	0.489373	-0.623508	33	86.25	46
994	9870	IP-Moz-0	CS77111	ESP	41.91	0.17	Carlos Alonso-Blanco	Monsanto	0.325166	0.39579	0.341972	0.403267	0.146157	8	100.5	63
995	9871	IP-Nac-0	CS77117	ESP	40.75	-3.99	Carlos Alonso-Blanco	Monsanto	0.294765	0.359043	0.420814	0.185213	-0.15875	-15	105	76
996	9873	IP-Ndc-0	CS77125	ESP	37.94	-5.45	Xavier Pic√≥	Monsanto	0.183691	0.184972	0.284999	0.286586	-0.432283	32	66.75	36
997	9874	IP-Oja-0	CS77143	ESP	42.34	-3	Carlos Alonso-Blanco	Monsanto	0.516634	0.143425	0.325381	0.387025	-0.819182	-6	68.75	54
998	9875	IP-Ovi-1	CS77155	ESP	43.38	-5.87	Carlos Alonso-Blanco	Monsanto	0.101557	0.374469	0.327849	0.339443	0.132956	36	63.75	38
999	9876	IP-Pad-0	CS77158	ESP	41.34	0.99	Carlos Alonso-Blanco	Monsanto	0.338132	0.338612	0.38297	0.363125	-0.123101	6	87.25	76
1000	9877	IP-Pdl-0	CS77165	ESP	43.02	-5.6	Carlos Alonso-Blanco	Monsanto	0.571627	0.21075	0.155903	0.21106	0.301439	-37	124.75	54
1001	9878	IP-Pee-0	CS77167	ESP	40.78	-3.62	Carlos Alonso-Blanco	Monsanto	0.17294	0.171534	0.418072	0.392468	-0.89087	1	113.25	63
1002	9879	IP-Per-0	CS77169	ESP	37.6	-1.12	Carlos Alonso-Blanco	Monsanto	0.737012	0.382422	0.344097	0.45918	0.1056	47	68.5	73
1003	9880	IP-Pib-1	CS77175	ESP	42.72	-3.44	Carlos Alonso-Blanco	Monsanto	0.313867	0.198958	0.321473	0.281799	-0.479819	13	91.5	61
1004	9881	IP-Pie-0	CS77176	ESP	40.46	-5.32	Carlos Alonso-Blanco	Monsanto	0.194073	0.136775	0.29686	0.308693	-0.774923	-8	82	41
1005	9882	IP-Pil-0	CS77178	ESP	40.46	-4.26	Carlos Alonso-Blanco	Monsanto	0.289211	0.307967	0.462635	0.343284	-0.406948	-2	78.5	48
1006	9883	IP-Piq-0	CS77179	ESP	42.1	-2.56	Carlos Alonso-Blanco	Monsanto	0.201276	0.0740436	0.199301	0.162467	-0.990161	-31	60	34
1007	9885	IP-Prd-0	CS77189	ESP	41.14	-3.68	Carlos Alonso-Blanco	Monsanto	0.210951	0.0788427	0.178802	0.23966	-0.818822	-14	116.25	57
1008	9886	IP-Pru-0	CS77190	ESP	42.38	1.73	Xavier Pic√≥	Monsanto	0.108914	0.0647882	0.266763	0.251729	-1.41524	-28	85.75	66
1009	9887	IP-Pun-0	CS77196	ESP	40.4	-4.77	Carlos Alonso-Blanco	Monsanto	0.278122	0.261209	0.252571	0.180894	0.0336301	-2	89.33	75
1010	9888	IP-Pva-1	CS77197	ESP	40.93	-3.31	Xavier Pic√≥	Monsanto	0.328573	0.300905	0.383724	0.24806	-0.243129	-2	86.25	47
1011	9890	IP-Rib-1	CS77217	ESP	43.16	-5.07	Carlos Alonso-Blanco	Monsanto	0.392868	0.299328	0.0666392	0.117473	1.50225	0	96	53
1012	9891	IP-Sal-0	CS77230	ESP	41.93	2.92	Xavier Pic√≥	Monsanto	0.311394	0.129165	0.389757	0.365662	-1.10443	44	83	75
1013	9892	IP-Sam-0	CS77231	ESP	42.68	-6.96	Carlos Alonso-Blanco	Monsanto	0.135138	0.0600576	0.141506	0.164475	-0.857035	-2	88.5	41
1014	9894	IP-Sen-0	CS77243	ESP	42.59	0.76	Xavier Pic√≥	Monsanto	0.209023	0.217263	0.120938	0.0857221	0.585832	-58	88.25	50
1015	9895	IP-Sfb-6	CS77248	ESP	41.78	2.57	Xavier Pic√≥	Monsanto	0.214829	0.0968052	0.321267	0.299894	-1.19957	44	75.75	41
1016	9897	IP-Smt-1	CS77257	ESP	40.95	-5.63	Xavier Pic√≥	Monsanto	0.411958	0.314822	0.38009	0.304633	-0.188401	0	81	47
1017	9898	IP-Som-0	CS77259	ESP	41.14	-3.58	Carlos Alonso-Blanco	Monsanto	0.0722911	0.132113	0.18552	0.167117	-0.339507	-40	97.75	67
1018	9899	IP-Tau-0	CS77342	ESP	42.54	0.84	Xavier Pic√≥	Monsanto	0.209023	0.217263	0.120938	0.0857221	0.585832	-50	70.75	61
1019	9900	IP-Tri-0	CS77386	ESP	37.38	-6.01	Xavier Pic√≥	Monsanto	0.260087	0.366653	0.480186	0.328869	-0.269759	56	53	40
1020	9901	IP-Urd-1	CS78824	ESP	42.27	-2.98	Carlos Alonso-Blanco	Monsanto	0.383283	0.143425	0.232072	0.25471	-0.481233	-35	117	71
1021	9902	IP-Usa-0	CS78825	ESP	40.71	-3.24	Carlos Alonso-Blanco	Monsanto	0.244044	0.234197	0.41677	0.44711	-0.57637	4	98	56
1022	9903	IP-Val-0	CS78829	ESP	42.31	-3.1	Carlos Alonso-Blanco	Monsanto	0.286195	0.171192	0.14891	0.103495	0.139442	-21	108	46
1023	9904	IP-Vas-0	CS78833	ESP	40.95	-3.31	Carlos Alonso-Blanco	Monsanto	0.328573	0.300905	0.383724	0.24806	-0.243129	-2	107.5	58
1024	9905	IP-Ven-0	CS78840	ESP	40.76	-4.01	Carlos Alonso-Blanco	Monsanto	0.235508	0.0874811	0.241053	0.180243	-1.01359	-36	89.75	57
1025	9906	IP-Mah-6	CS77063	ESP	40	4.25	Xavier Pic√≥	Monsanto	0.739746	0.677636	0.300905	0.452316	0.811816	76	88	55
1026	9908	ESP-1-11	CS76847	FRA	50.72	3.47	0	Monsanto	0.44586	0.196078	0.215069	0.257033	-0.0924453	2	65.25	43
1027	9909	GEN-8	CS76877	FRA	50.59	3.3	0	Monsanto	0.396112	0.237351	0.123269	0.198343	0.655172	1	87	34
1028	9910	BRI-2	CS76725	FRA	50.68	3.52	0	Monsanto	0.371581	0.235568	0.145893	0.221104	0.479125	0	70	44
1029	9911	ARGE-1-15	CS76672	FRA	47.16	4.28	0	Monsanto	0.233554	0.157823	0.191554	0.216564	-0.193696	-15	66	60
1030	9912	CIRY-13	CS76773	FRA	46.67	4.55	0	Monsanto	0.113075	0.0811052	0.258536	0.211841	-1.15929	-10	NA	36
1031	9914	IST-29	CS76948	FRA	47.58	5.33	0	Monsanto	0.318139	0.110791	0.201426	0.155409	-0.597775	-15	74.75	33
1032	9915	MAR-4-16	CS77069	FRA	47.45	3.94	0	Monsanto	0.175871	0.0813108	0.265323	0.202274	-1.18267	-9	84.25	47
1033	9917	RAD-21	CS77200	FRA	46.69	4.34	0	Monsanto	0.156126	0.0858357	0.279446	0.234865	-1.18037	-8	75.25	50
1034	9918	SAUL-24	CS77237	FRA	47.43	5.21	0	Monsanto	0.379675	0.14322	0.382079	0.277148	-0.981248	-14	81.25	49
1035	9920	DIR-9	CS76796	FRA	48.54	4.32	0	Monsanto	0.414996	0.263472	0.279652	0.42388	-0.0595985	-10	64	46
1036	9921	FOR-23	CS76867	FRA	48.57	4.41	0	Monsanto	0.414996	0.263472	0.279652	0.42388	-0.0595985	-11	64.5	38
1037	9924	PLY-20	CS77181	FRA	48.59	4.24	0	Monsanto	0.302053	0.166392	0.433635	0.291038	-0.957854	-10	66.5	63
1038	9925	RUM-20	CS77226	FRA	48.91	4.52	0	Monsanto	0.534074	0.235843	0.277184	0.255448	-0.161516	-11	92.5	62
1039	9926	TRE-1	CS77385	FRA	48.86	4.1	0	Monsanto	0.591835	0.276224	0.430276	0.254258	-0.443215	-11	67	31
1040	9927	ARR-17	CS76673	FRA	44.05	3.69	0	Monsanto	0.302542	0.298643	0.355752	0.342881	-0.174987	-3	87.75	36
1041	9928	BEZ-9	CS76703	FRA	44.12	3.77	0	Monsanto	0.180027	0.242836	0.220005	0.187111	0.0987322	-3	83.5	33
1042	9929	ISS-20	CS76947	FRA	43.92	3.71	0	Monsanto	0.238105	0.180447	0.288839	0.257368	-0.470431	7	85.25	63
1043	9930	LEC-25	CS77018	FRA	43.91	4.14	0	Monsanto	0.275628	0.238174	0.431647	0.281532	-0.594608	7	75.75	37
1044	9932	NOZ-6	CS77134	FRA	44.12	4.33	0	Monsanto	0.272659	0.14322	0.286439	0.200735	-0.693147	2	81.5	29
1045	9933	VED-10	CS78839	FRA	43.74	3.89	0	Monsanto	0.172871	0.173248	0.346702	0.236215	-0.693741	11	76.75	55
1046	9935	BAU-15	CS76694	FRA	50.6	2.93	0	Monsanto	0.546157	0.166187	0.231866	0.28459	-0.333048	4	79.25	41
1047	9937	CATS-6	CS76760	FRA	50.79	2.69	0	Monsanto	0.481412	0.112368	0.238722	0.219245	-0.753521	6	67	48
1048	9938	WAV-8	CS78854	FRA	50.65	2.99	0	Monsanto	0.546157	0.166187	0.231866	0.28459	-0.333048	4	67.25	50
1049	9939	Aitba-2	CS76347	MAR	31.48	-7.45		MPI	0.275915	0.236734	0.360757	0.351946	-0.421268	-19	75.25	24
1050	9941	Fei-0	CS76412	POR	40.92	-8.54		MPI	0.319596	0.207185	0.283628	0.266559	-0.314052	45	70	18
1051	9942	Agu-1	CS76409	ESP	41.32	-1.34		MPI	0.462743	0.21267	0.179967	0.315804	0.166966	-21	65.67	54
1052	9943	Cdm-0	CS76410	ESP	39.73	-5.74		MPI	0.119584	0.176196	0.155971	0.144299	0.121926	28	74	30
1053	9944	Don-0	CS76411	ESP	36.83	-6.36		MPI	0.404819	0.206842	0.273139	0.567043	-0.278023	74	75.75	40
1054	9945	Leo-1	CS76413	ESP	41.8	-3.11		MPI	0.385592	0.294323	0.257781	0.166794	0.132567	-17	113.5	21
1055	9946	Mer-6	CS76414	ESP	38.92	-6.34		MPI	0.336144	0.347525	0.438708	0.451259	-0.232998	42	61.5	20
1056	9947	Ped-0	CS76415	ESP	40.74	-3.9		MPI	0.294765	0.359043	0.420814	0.185213	-0.15875	-5	104.5	40
1057	9948	Pra-6	CS76416	ESP	41.05	-3.54		MPI	0.0722911	0.132113	0.18552	0.167117	-0.339507	-17	105	35
1058	9949	Qui-0	CS76417	ESP	42.69	-6.93		MPI	0.135138	0.0600576	0.141506	0.164475	-0.857035	-1	76.75	32
1059	9950	Vie-0	CS76418	ESP	42.63	0.76		MPI	0.603404	0.510352	0.212601	0.104221	0.875684	-66	99	56
1060	9951	Kly-1	CS76385	RUS	51.3333	82.5667	Heike Schmuths	MPI	0.266231	0.183395	0.197792	0.187346	-0.0755755	-202	98.75	14
1061	9952	Kly-4	CS76384	RUS	51.32	82.55		MPI	0.266231	0.183395	0.197792	0.187346	-0.0755755	-202	86	25
1062	9953	Koz-2	CS76383	RUS	51.33	82.19		MPI	0.287733	0.306527	0.151584	0.185362	0.704167	-209	88	35
1063	9955	Stepn-2	CS76377	RUS	54.09	60.46		MPI	0.388365	0.184835	0.18744	0.280594	-0.0139965	-211	80.5	18
1064	9956	Stepn-1	CS76378	RUS	54.06	60.48		MPI	0.383497	0.30735	0.178939	0.363444	0.540942	-209	72.75	27
1065	9957	Borsk-2	CS76421	RUS	53.04	51.75		MPI	0.551222	0.326957	0.155903	0.251319	0.740596	-170	83.75	20
1066	9958	Shigu-1	CS76375	RUS	53.33	49.48		MPI	0.269346	0.437131	0.229398	0.24379	0.644775	-165	82	38
1067	9959	Shigu-2	CS76374	RUS	53.33	49.48		MPI	0.269346	0.437131	0.229398	0.24379	0.644775	-165	81.5	21
1068	9960	Kidr-1	CS76376	RUS	51.31	57.56		MPI	0.277664	0.226107	0.176813	0.335374	0.245914	-210	82.5	15
1069	9962	Galdo-1	CS76423	ITA	40.57	15.32		MPI	0.12707	0.132661	0.202112	0.171509	-0.42102	32	78	18
1070	9963	Lago-1	CS76367	ITA	39.18	16.26		MPI	0.204961	0.0324284	0.298163	0.177973	-2.21861	37	75	18
1071	9964	Mammo-1	CS76365	ITA	38.36	16.23		MPI	0.231802	0.153435	0.367407	0.288844	-0.873195	59	70	22
1072	9965	Mammo-2	CS76364	ITA	38.38	16.22		MPI	0.231802	0.153435	0.367407	0.288844	-0.873195	40	70.5	21
1073	9966	Monte-1	CS76361	ITA	40.28	15.65		MPI	0.139663	0.250857	0.105375	0.203195	0.867357	40	90.5	28
1074	9968	Timpo-1	CS76424	ITA	39.27	16.27		MPI	0.204961	0.0324284	0.298163	0.177973	-2.21861	60	66.75	14
1075	9969	Valsi-1	CS76425	ITA	40.18	16.45		MPI	0.383827	0.183464	0.232346	0.410725	-0.236212	45	68.75	9
1076	9970	Altenb-2	CS76353	ITA	46.3716	11.2376	Joerg Wunder	MPI	0.319223	0.18744	0.260661	0.210184	-0.329762	-52	86.5	13
1077	9971	Bozen-1.1	CS76357	ITA	46.513	11.331	Joerg Wunder	MPI	0.202771	0.138283	0.125806	0.155991	0.0945668	-63	70.5	40
1078	9972	Bozen-1.2	CS76358	ITA	46.513	11.331	Joerg Wunder	MPI	0.202771	0.138283	0.125806	0.155991	0.0945668	-63	63	25
1079	9973	Mitterberg-1-181	CS76354	ITA	46.366	11.2832	Joerg Wunder	MPI	0.254259	0.0995475	0.161525	0.164193	-0.484023	-32	94.25	20
1080	9974	Castelfed-4-212	CS76355	ITA	46.3378	11.2928	Joerg Wunder	MPI	0.254259	0.0995475	0.161525	0.164193	-0.484023	-44	94	16
1081	9975	Castelfed-4-213	CS76356	ITA	46.3378	11.2928	Joerg Wunder	MPI	0.254259	0.0995475	0.161525	0.164193	-0.484023	-44	79.25	32
1082	9976	Rovero-1	CS76351	ITA	46.2543	11.167	Joerg Wunder	MPI	0.184681	0.199164	0.162073	0.206731	0.206078	-55	79	17
1083	9978	Vezzano-2.2	CS76350	ITA	46.6297	10.817	Joerg Wunder	MPI	0.817029	0.667764	0.407103	0.511886	0.494869	-84	80.25	22
1084	9979	Voeran-1	CS76352	ITA	46.36	11.23		MPI	0.184681	0.199164	0.162073	0.206731	0.206078	-52	82.5	37
1085	9980	Angel-1	CS76362	ITA	38.62	16.17		MPI	0.210476	0.265323	0.304744	0.340763	-0.138525	69	68.5	16
1086	9981	Angit-1	CS76366	ITA	38.76	16.24		MPI	0.407026	0.154806	0.0529275	0.315998	1.07325	75	69.25	10
1087	9982	Apost-1	CS76368	ITA	39.01	16.47		MPI	0.27981	0.236254	0.368093	0.277928	-0.443428	34	85.5	23
1088	9983	Ciste-1	CS76359	ITA	41.62	12.87		MPI	0.314077	0.079117	0.208213	0.259376	-0.967636	32	63	16
1089	9984	Ciste-2	CS76360	ITA	41.62	12.87		MPI	0.314077	0.079117	0.208213	0.259376	-0.967636	32	65.75	12
1090	9985	Slavi-1	CS76419	BUL	41.43	23.65		MPI	0.404832	0.219114	0.127999	0.310341	0.537567	-53	71	9
1091	9986	Jablo-1	CS76372	BUL	41.59	25.2		MPI	0.351951	0.24359	0.236117	0.331843	0.0311587	-37	89.33	23
1092	9987	Lecho-1	CS76371	BUL	41.43	23.5		MPI	0.378676	0.203277	0.360825	0.437284	-0.573824	-24	91	24
1093	9988	Bak-2	CS76392	GEO	41.7942	43.4767	James Beck	MPI	0.46971	0.279583	0.137049	0.225892	0.71296	-97	95.5	29
1094	9990	Lag2-2	CS76390	GEO	41.8296	46.2831	James Beck	MPI	0.384251	0.22501	0.225147	0.236812	-0.000609199	-24	83.75	17
1095	9991	Vash-1	CS76391	GEO	41.2381	46.3728	James Beck	MPI	0.750853	0.407994	0.247429	0.449731	0.500129	-17	90.5	23
1096	9993	Nemrut-1	CS76398	TUR	38.6425	42.2394	James Beck	MPI	0.606373	0.356095	0.41245	0.320889	-0.146918	-105	97.75	24
1097	9995	HKT2.4	CS76404	GER	48.14	9.4		MPI	0.50734	0.1727	0.395516	0.218583	-0.828637	-38	64.25	23
1098	9996	Nie1-2	CS76402	GER	48.52	8.8		MPI	0.512529	0.337447	0.196216	0.267076	0.542194	-34	61.33	11
1099	9997	Rue3-1-31	CS76406	GER	48.56	9.16		MPI	0.46267	0.274304	0.235843	0.22037	0.151073	-33	70.25	19
1100	9998	Star-8	CS76400	GER	48.43	8.82		MPI	0.512529	0.337447	0.196216	0.267076	0.542194	-34	68	16
1101	9999	TueSB30-3	CS76403	GER	48.53	9.06		MPI	0.230311	0.254902	0.187577	0.247386	0.306689	-31	72	22
1102	10001	TueV-13	CS76407	GER	48.52	9.05	Kirsten Bomblies	MPI	0.375257	0.307829	0.145002	0.169517	0.752798	-31	68.75	30
1103	10002	TueWa1-2	CS76405	GER	48.53	9.04	Kirsten Bomblies	MPI	0.230311	0.254902	0.187577	0.247386	0.306689	-32	61	30
1104	10004	Bolin-1	CS76373	ROU	44.46	25.74		MPI	0.459409	0.41149	0.259633	0.440593	0.460519	-59	81.75	24
1105	10005	Copac-1	CS76420	ROU	46.11	21.95		MPI	0.491674	0.25216	0.200192	0.234736	0.230786	-46	76.67	9
1106	10006	Kastel-1	CS76395	UKR	44.6419	34.3814	James Beck	MPI	0.454785	0.311257	0.35301	0.365117	-0.125876	-22	113.5	24
1107	10008	Sij-1	CS76379	UZB	41.45	70.05	Heike Schmuths	MPI	0.342345	0.306527	0.366173	0.454498	-0.177801	-165	79.25	25
1108	10009	Sij-2	CS76380	UZB	41.45	70.05		MPI	0.342345	0.306527	0.366173	0.454498	-0.177801	-165	80.75	23
1109	10010	Sij-4	CS76381	UZB	41.45	70.05		MPI	0.342345	0.306527	0.366173	0.454498	-0.177801	-165	85	33
1110	10011	Yeg-1	CS76394	ARM	39.8692	45.3622	James Beck	MPI	0.536349	0.436172	0.135335	0.397142	1.17028	-100	71	24
1111	10012	Istisu-1	CS76389	AZE	38.9786	48.5594	James Beck	MPI	0.514594	0.496229	0.384821	0.239866	0.25426	-5	113.5	23
1112	10013	Lerik1-3	CS76388	AZE	38.7406	48.6131	James Beck	MPI	0.571794	0.382696	0.338612	0.315273	0.122384	-12	92.25	21
1113	10014	Xan-1	CS76387	AZE	38.6536	48.7992	James Beck	MPI	0.563374	0.288701	0.417455	0.275769	-0.368784	12	96.75	24
1114	10015	Ara-1	CS76382	AFG	37.29	71.3		MPI	0.262353	0.208556	0.244755	0.454551	-0.16005	-224	69.75	35
1115	10017	Petro-1	CS76370	SRB	44.34	21.46		MPI	0.389063	0.330454	0.150967	0.348896	0.783408	-34	87.5	18
1116	10018	Dobra-1	CS76369	SRB	44.84	20.16		MPI	0.50102	0.438228	0.355889	0.458111	0.208121	-26	90	39
1117	10020	Jl-2	CS76956	CZE	49.17	16.5		MPI	0.492176	0.344508	0.473742	0.358992	-0.318544	-52	72.5	51
1118	10022	Uk-3	CS78777	GER	48.0333	7.7667	Albert Kranz	MPI	0.566074	0.242081	0.354312	0.251178	-0.380905	-10	73.5	39
1119	10023	Strand-1	CS77284	NOR	68.8	15.45		MPI	NA	0.217075	0.0924859	0.276194	0.853184	NA	96.25	90
1120	10027	Uk-6	CS78938	GER	48.0284	7.76557	Eunyoung Chae	MPI	0.566074	0.242081	0.354312	0.251178	-0.380905	-10	NA	54
1121	14312	Kos-1	CS78923	RUS	62.02	34.12	Magnus Nordborg	GMI	0.32042	0.465253	0.281777	0.615584	0.501466	-148	NA	78
1122	14313	Kos-2	CS78924	RUS	62.02	34.12	Magnus Nordborg	GMI	0.32042	0.465253	0.281777	0.615584	0.501466	-148	NA	83
1123	14314	Radk-1	CS78927	RUS	61.59	35.11	Magnus Nordborg	GMI	NA	NA	NA	NA	NA	-148	NA	70
1124	14315	Radk-2	CS78928	RUS	61.59	35.11	Magnus Nordborg	GMI	NA	NA	NA	NA	NA	-148	NA	85
1125	14318	Shu-1	CS78930	RUS	61.94	34.24	Magnus Nordborg	GMI	0.474435	0.513258	0.170986	0.332981	1.0992	-149	NA	79
1126	14319	Shu-2	CS78931	RUS	61.94	34.24	Magnus Nordborg	GMI	0.474435	0.513258	0.170986	0.332981	1.0992	-149	NA	84
1127	15560	Valm	CS78932	RUS	61.37	61.37	Magnus Nordborg	GMI	0.392013	0.233974	0.101467	0.111622	0.835476	-251	NA	65
1128	15591	OOE1-1	CS78939	AUT	48.3315	14.7266	Wolfram Weckwert	GMI	0.546162	0.235363	0.309475	0.297785	-0.273749	-63	NA	52
1129	15592	OOE3-1	CS78940	AUT	48.3315	14.7159	Wolfram Weckwert	GMI	0.546162	0.235363	0.309475	0.297785	-0.273749	-63	NA	40
1130	15593	OOE3-2	CS78941	AUT	48.3315	14.7159	Wolfram Weckwert	GMI	0.546162	0.235363	0.309475	0.297785	-0.273749	-63	NA	58
1131	18694	Pien	CS78926	RUS	60.4	32.09	Magnus Nordborg	GMI	NA	NA	NA	NA	NA	-131	NA	60
1132	18696	Samm	CS78929	RUS	61.57	30.63	Magnus Nordborg	GMI	0.39637	0.2687	0.395769	0.431527	-0.387233	-136	NA	69
1133	19949	OOE2-1	CS79036	AUT	48.3268	14.7182	Wolfram Weckwert	GMI	0.546162	0.235363	0.309475	0.297785	-0.273749	-63	NA	55
1134	19950	OOE2-2	CS79037	AUT	48.3268	14.7182	Wolfram Weckwert	GMI	0.546162	0.235363	0.309475	0.297785	-0.273749	-63	NA	60
1135	19951	OOE23	CS79038	AUT	48.3268	14.7182	Wolfram Weckwert	GMI	0.546162	0.235363	0.309475	0.297785	-0.273749	-63	NA	62
