# Supplementary material for: Drought adaptation in Arabidopsis thaliana by extensive genetic loss-of-function
Source: eLife. 2018 Dec 6;7:e41038. doi: 10.7554/eLife.41038 (PMC6326724; doi:10.7554/eLife.41038)
Supplement: Supplementary file 2. — (A) Flowering time predicted by seasonal drought frequencies. Arabidopsis common garden flowering times were predicted by historic drought frequencies (DF) during different seasons at ecotypes’ location of origin using multiple linear regression. (B) The strength of association between LoF alleles and flowering time (-log10 transformed P values) predicted by the strength of LoF alleles with drought timing, latitude, and minimum temperature. [file elife-41038-supp2.xlsx]

## Sheet: (A) model  flw=w+sp+s+f
Predictor	Estimate	Std.Error	tvalue	P
(Intercept)	78.755	1.934	40.719	<2e-16
Winter_DF	-3.601	4.724	-0.762	0.446
Spring_DF	50.016	5.135	9.74	<2e-16
Summer_DF	-28.035	5.51	-5.088	4.35e-07
Fall_DF	-4.329	6.237	-0.694	0.488

## Sheet: (B) model  flwp=dtp+latp+tempp
Predictor	Estimate	Std. Error	t value	P
(Intercept)	0.37417	0.0545	6.865	8.72e-12
`-log10(drought timing P)`	0.50552	0.03062	16.508	< 2e-16
`-log10(latitude P)`	0.26647	0.0139	19.173	< 2e-16
`-log10(min temp P)`	0.01788	0.03523	0.508	0.612
