# Supplementary figures and images for: Drought adaptation in Arabidopsis thaliana by extensive genetic loss-of-function
Source: eLife journal article supplement (doi:10.7554/elife.41038), 2018-12-06

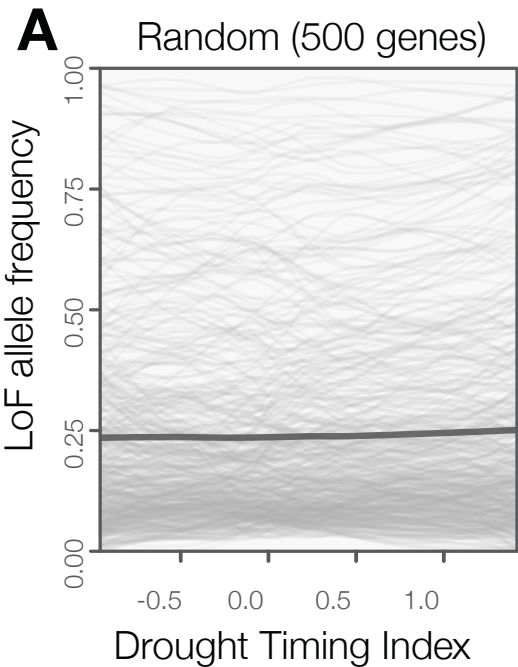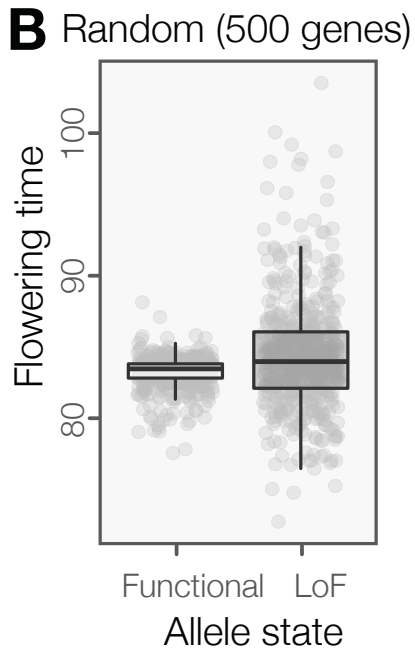

Supplement: supp [file elife-41038-supp-v1.zip]

## LoF genotypes

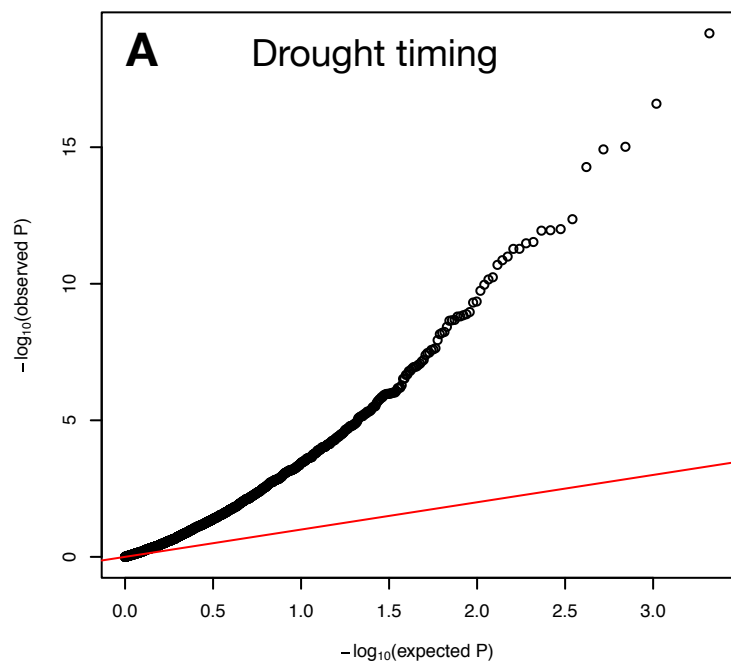

## Randomized LoF genotypes

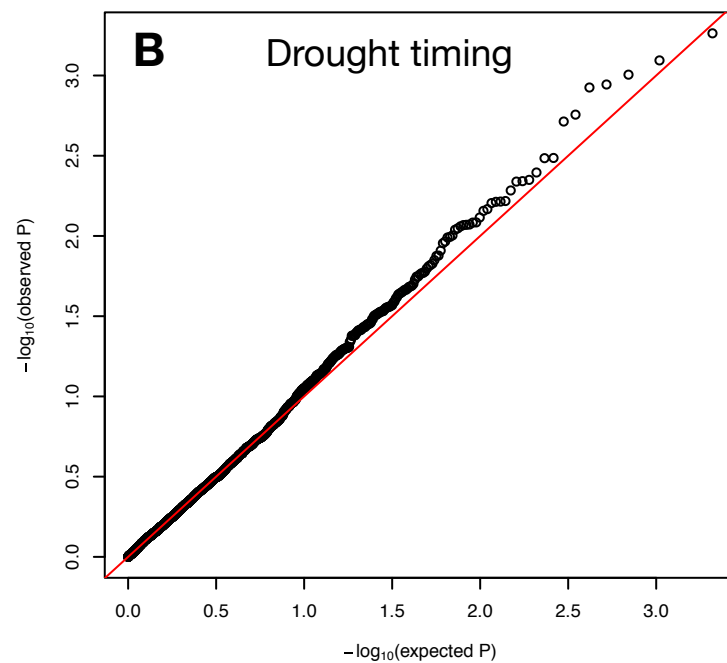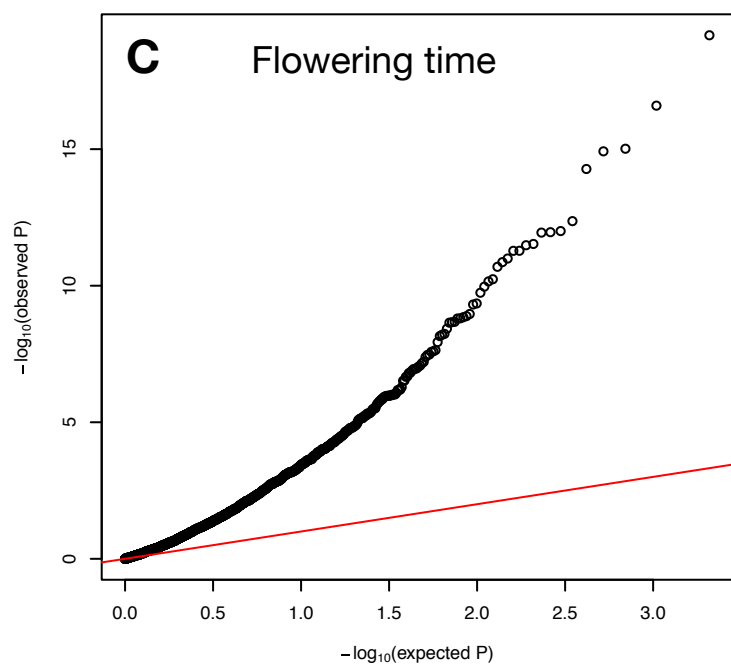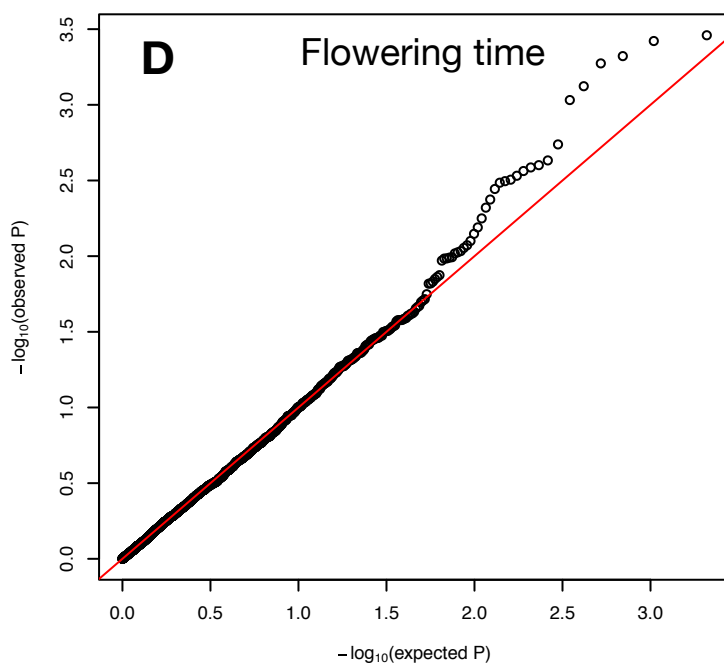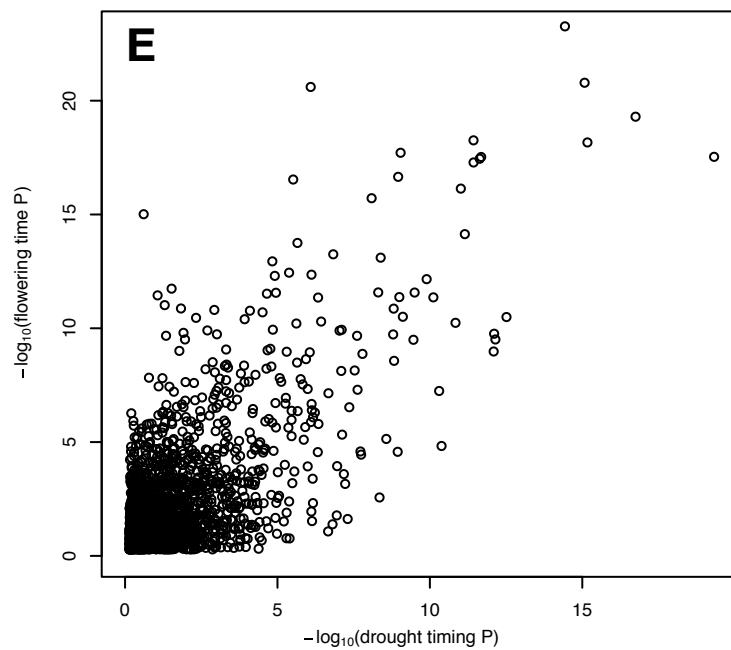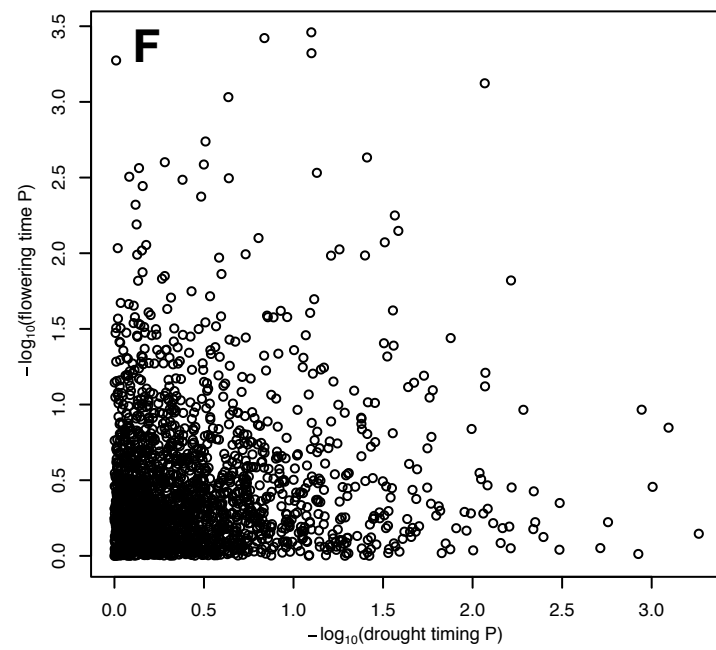

Supplement: supp [file elife-41038-supp-v1.zip]
